# Supplementary material for: Electrochemical Hydroboration of Alkynes
Source: PubMed Central journal article supplement — Chemistry. 2021 May 19;27(32):8277–82. doi: 10.1002/chem.202101132 (PMC8251609; doi:10.1002/chem.202101132), 2021-05-19
Supplement: CHEM-27-8277-s001.pdf [file CHEM-27-8277-s001.pdf]

# Chemistry–A European Journal

Supporting Information

## **Electrochemical Hydroboration of Alkynes**

Maude Aelterman, Morgane Sayes, Philippe Jubault,\* and Thomas Poisson\*

## TABLE OF CONTENTS

|                                                 |           |
|-------------------------------------------------|-----------|
| <b>GENERAL INFORMATIONS .....</b>               | <b>2</b>  |
| SOLVENTS .....                                  | 2         |
| REAGENTS .....                                  | 2         |
| <b>BORONATE FORMATION .....</b>                 | <b>2</b>  |
| GENERAL PROCEDURE A.....                        | 2         |
| GENERAL PROCEDURE B.....                        | 3         |
| PRODUCTS PURIFICATION AND CHARACTERIZATION..... | 3         |
| SCALE UP.....                                   | 17        |
| <b>MECHANISTIC STUDIES.....</b>                 | <b>18</b> |
| CYCLIC VOLTAMMETRY MEASUREMENTS .....           | 18        |
| CONTROL EXPERIMENTS.....                        | 21        |
| DEUTERATION EXPERIMENTS.....                    | 22        |
| KINETIC ISOTOPE EFFECT (KIE) .....              | 23        |
| SENSITIVITY ASSESSMENT.....                     | 25        |
| <b>NMR-SPECTRA OF KEY COMPOUNDS .....</b>       | <b>27</b> |
| <b>REFERENCES .....</b>                         | <b>72</b> |

## General Informations

Reactions were performed with ElectraSyn® 2.0 package from IKA® device. Flash chromatographies were performed with silica gel (0.040-0.060 nm). Analytical thin layer chromatographies were performed on silica gel aluminum plates with F-254 indicator and visualized by UV light (254 nm) and/or chemical staining with a *p*-anisaldehyde solution. NMR spectra were recorded on a Bruker DXP 300 instrument at 300 MHz for <sup>1</sup>H, 75 MHz for <sup>13</sup>C, 282 MHz for <sup>19</sup>F and 96 MHz for <sup>11</sup>B in CDCl<sub>3</sub> or benzene-d<sub>6</sub> at room temperature unless otherwise stated. Chemical shifts (δ) were quoted in parts per million (ppm) relative to the residual peak of CHCl<sub>3</sub> (δ<sub>H</sub> = 7.26 ppm and δ<sub>C</sub> = 77.16 ppm) and benzene (δ<sub>H</sub> = 7.16 ppm and δ<sub>C</sub> = 128.06 ppm). Spectra are reported as follows: chemical shift δ (ppm), multiplicity (s = singlet, d = doublet, dd = doublet of doublets, t = triplet, td = triplet of doublets q = quartet and m = multiplet), integration and coupling constant. High-resolution mass spectra (HRMS) were recorded on Waters LCT Premier and IR spectra were recorded on a PerkinElmer Spectrum 100. Melting point were measured with the Stuart SMP3 device in open capillaries.

## Solvents

Methanol 99.9% extra-dry AcroSeal™ was used for reactions. Technical grade solvents for extraction and purification (cyclohexane, dichloromethane, *n*-pentane, ethyl acetate, diethyl ether and petroleum ether) were used without purification.

## Reagents

All reagents were commercial and used as received except compounds below.

(4-ethynylphenyl)methanol and 2-ethynyl-naphthalene were prepared according to the literature.<sup>1</sup>

(*R*)-2,5,7,8-tetramethyl-6-(prop-2-yn-1-yloxy)-2-((4*R*,8*R*)-4,8,12-trimethyltridecyl)chromane was prepared according to the literature.<sup>2</sup>

2-(4-ethynylphenyl)-2-methyl-1,3-dioxolane was prepared according to the literature.<sup>1,3</sup>

## Boronate Formation

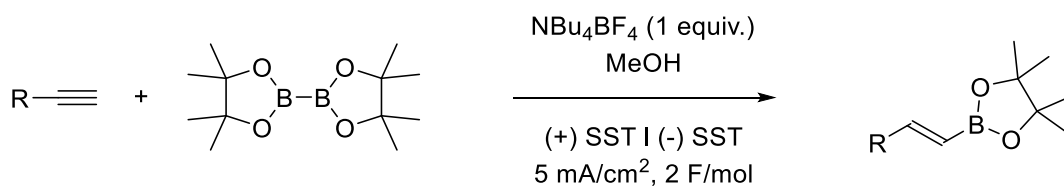

## General procedure A

In a 5 mL IKA® vial were added the alkyne derivative (0.2 mmol, 1 equiv.), B<sub>2</sub>Pin<sub>2</sub> (102 mg, 0.4 mmol, 2 equiv.) and NBu<sub>4</sub>BF<sub>4</sub> (66 mg, 0.2 mmol, 1 equiv.) in anhydrous MeOH (4 mL). The reaction mixture was stirred under air before starting the IKA ElectraSyn® device ((+) SST, (-) SST, 5 mA/cm<sup>2</sup>, 2 F/mol, 64 min). Then, HCl 1 M (2 mL) was added and the aqueous layer was extracted with EtOAc (3 x 10 mL). The combined organic layers were washed with a NH<sub>4</sub>Cl saturated aqueous solution, dried over MgSO<sub>4</sub>, filtered and concentrated under reduced pressure. Then, the residue was purified by flash chromatography. [SST=Stainless Steel]

## General procedure B

In a 5 mL IKA<sup>®</sup> vial were added the alkyne derivative (0.2 mmol, 1 equiv.), B<sub>2</sub>Pin<sub>2</sub> (102 mg, 0.4 mmol, 2 equiv.), K<sub>2</sub>CO<sub>3</sub> (28 mg, 0.2 mmol, 1 equiv.) and NBu<sub>4</sub>BF<sub>4</sub> (66 mg, 0.2 mmol, 1 equiv.) in anhydrous MeOH (4 mL). The reaction mixture was stirred under air before starting the IKA ElectraSyn<sup>®</sup> device ((+) SST, (-) SST, 5 mA/cm<sup>2</sup>, 2.5 F/mol, 100 min). Then, HCl 1 M (2 mL) was added and the aqueous layer was extracted with EtOAc (3 x 10 mL). The combined organic layers were washed with a NH<sub>4</sub>Cl saturated aqueous solution, dried over MgSO<sub>4</sub>, filtered and concentrated under reduced pressure. Then, the residue was purified by flash chromatography. [SST=Stainless Steel]

## Products purification and characterization

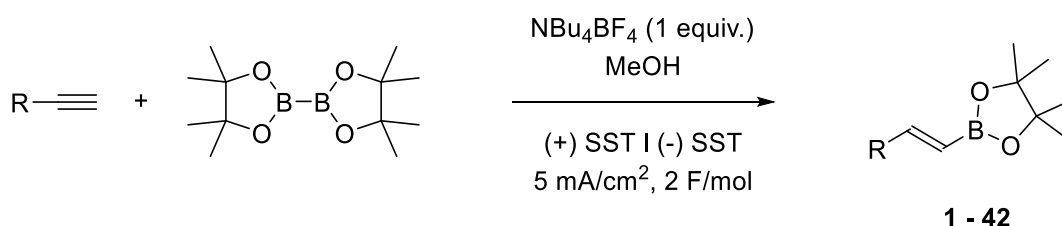

### (E)-4,4,5,5-tetramethyl-2-styryl-1,3,2-dioxaborolane (1)

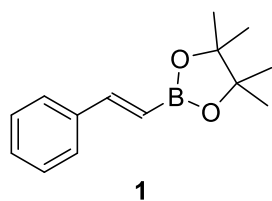

Prepared following the general procedure **A** in duplicate and combined prior to purification. **Yield:** 84% (77.1 mg, 0.34 mmol). Flash column chromatography: pentane/EtOAc: 98:2; Pale yellow oil; **R<sub>f</sub>:** 0.66 (petroleum ether/EtOAc: 9:1); **<sup>1</sup>H NMR (300 MHz, CDCl<sub>3</sub>):** δ 7.50-7.48 (m, 2H), 7.40 (d, *J* = 19.0 Hz, 1H), 7.34-7.29 (m, 3H), 6.17 (d, *J* = 18.4 Hz, 1H), 1.32 (s, 12H); **<sup>13</sup>C NMR (75 MHz, CDCl<sub>3</sub>):** δ 149.7, 137.6, 129.0, 128.7, 127.2, 83.5, 24.9. The carbon bearing boron was not observed. **<sup>11</sup>B NMR (96 MHz, CDCl<sub>3</sub>):** δ 30.8; **IR (neat, cm<sup>-1</sup>):** ν 2978, 2927, 1623, 1350, 1321, 1209, 1142, 747; **HRMS (API<sup>+</sup>):** calcd for [M+H]<sup>+</sup> C<sub>14</sub>H<sub>20</sub>BO<sub>2</sub>: 231.1556, found: 231.1560 (+ 1.7 ppm). The data were consistent with those reported in the literature.<sup>4</sup>

### (E)-4,4,5,5-tetramethyl-2-(4-methylstyryl)-1,3,2-dioxaborolane (2)

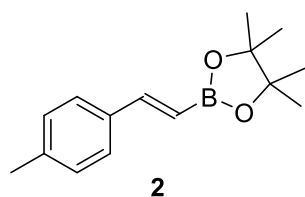

Prepared following to general procedure **A** in duplicate and combined prior to purification. **Yield:** 85% (83.4 mg, 0.34 mmol). Flash column chromatography: pentane/EtOAc: 40:1; Yellow amorphous solid; **R<sub>f</sub>:** 0.63 (petroleum ether/EtOAc: 9:1); **<sup>1</sup>H NMR (300 MHz, CDCl<sub>3</sub>):** δ 7.41-7.35 (m, 3H), 7.14 (d, *J* = 7.7 Hz, 2H), 6.12 (d, *J* = 18.5 Hz, 1H), 2.35 (s, 3H), 1.32 (s, 12H); **<sup>13</sup>C NMR (75 MHz, CDCl<sub>3</sub>):** δ 149.6, 139.1, 134.9, 129.4, 127.1, 83.4, 24.9, 21.5. The carbon bearing boron was not observed. **<sup>11</sup>B NMR (96 MHz, CDCl<sub>3</sub>):** δ 30.5; **IR (neat, cm<sup>-1</sup>):** ν 2978, 2921, 1626, 1346, 1324, 1139, 798, 493; **HRMS (EI<sup>+</sup>):** calcd for [MS] C<sub>15</sub>H<sub>21</sub>BO<sub>2</sub>: 244.16346, found: 244.16391 (- 1.8 ppm). The data were consistent with those reported in the literature.<sup>4</sup>

### (E)-4,4,5,5-tetramethyl-2-(3-methylstyryl)-1,3,2-dioxaborolane (3)

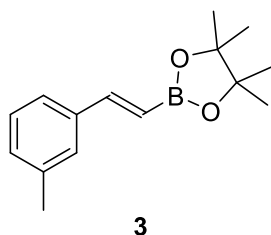

Prepared following to general procedure **A** in duplicate and combined prior to purification. **Yield:** 91% (88.5 mg, 0.36 mmol). Flash column chromatography: pentane/EtOAc: 40:1; Yellow amorphous solid; **R<sub>f</sub>**: 0.68 (petroleum ether/EtOAc: 9:1); **<sup>1</sup>H NMR (300 MHz, CDCl<sub>3</sub>):** δ 7.39 (d, *J* = 18.4 Hz, 1H), 7.31 (m, 2H), 7.23 (t, *J* = 7.7 Hz, 1H), 7.12 (d, *J* = 7.3 Hz, 1H), 6.17 (d, *J* = 18.4 Hz, 1H), 2.35 (s, 3H), 1.32 (s, 12H); **<sup>13</sup>C NMR (75 MHz, CDCl<sub>3</sub>):** δ 149.8, 138.2, 137.5, 129.8, 128.6, 127.9, 124.3, 83.4, 24.9, 21.5. The carbon bearing boron was not observed. **<sup>11</sup>B NMR (96 MHz, CDCl<sub>3</sub>):** δ 29.9; **IR (neat, cm<sup>-1</sup>):** ν 2978, 2927, 1624, 1343, 1321, 1141, 849, 776, 645; **HRMS (EI<sup>+</sup>):** calcd for [MS] C<sub>15</sub>H<sub>21</sub>BO<sub>2</sub>: 244.16346, found: 244.16383 (+ 1.5 ppm). The data were consistent with those reported in the literature.<sup>5</sup>

### (E)-4,4,5,5-tetramethyl-2-(2-methylstyryl)-1,3,2-dioxaborolane (4)

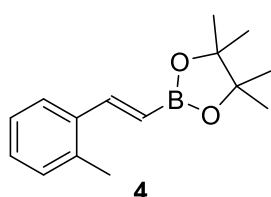

Prepared following to general procedure **A** in duplicate and combined prior to purification. **Yield:** 73% (71 mg, 0.29 mmol). Flash column chromatography: pentane/EtOAc: 40:1; Yellow amorphous solid; **R<sub>f</sub>**: 0.69 (petroleum ether/EtOAc: 9:1); **<sup>1</sup>H NMR (300 MHz, CDCl<sub>3</sub>):** δ 7.67 (d, *J* = 18.2 Hz, 1H), 7.59-7.56 (m, 1H), 7.21-7.16 (m, 3H), 6.11 (d, *J* = 18.2 Hz, 1H), 2.44 (s, 3H), 1.33 (s, 12H); **<sup>13</sup>C NMR (75 MHz, CDCl<sub>3</sub>):** δ 147.2, 136.8, 136.4, 130.5, 128.7, 126.2, 125.9, 83.4, 24.9, 19.9. The carbon bearing boron was not observed. **<sup>11</sup>B NMR (96 MHz, CDCl<sub>3</sub>):** δ 30.0; **IR (neat, cm<sup>-1</sup>):** ν 2979, 2928, 1618, 1347, 1328, 1141, 762; **HRMS (API<sup>+</sup>):** calcd for [M+H]<sup>+</sup> C<sub>15</sub>H<sub>22</sub>BO<sub>2</sub>: 245.1713, found: 245.1703 (- 4.1 ppm). The data were consistent with those reported in the literature.<sup>6</sup>

### (E)-2-(4-(tert-butyl)styryl)-4,4,5,5-tetramethyl-1,3,2-dioxaborolane (5)

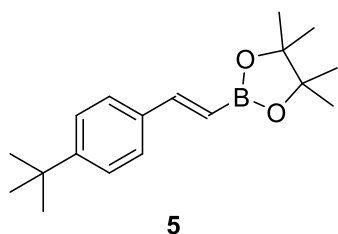

Prepared following to general procedure **A** in duplicate and combined prior to purification. **Yield:** 82% (94.3 mg, 0.33 mmol). Flash column chromatography: pentane/EtOAc: 40:1; Yellow solid; **Mp:** 77-78 °C (pentane/EtOAc); **R<sub>f</sub>**: 0.68 (petroleum ether/EtOAc: 9:1); **<sup>1</sup>H NMR (300 MHz, CDCl<sub>3</sub>):** δ 7.45-7.35 (m, 5H), 6.12 (d, *J* = 18.4 Hz, 1H), 1.31 (app s, 21H); **<sup>13</sup>C NMR (75 MHz, CDCl<sub>3</sub>):** δ 152.3, 149.5, 134.9, 127.0, 125.6, 83.4, 34.8, 31.4, 25.0. The carbon bearing boron was not observed. **<sup>11</sup>B NMR (96 MHz, CDCl<sub>3</sub>):** δ 29.8; **IR (neat, cm<sup>-1</sup>):** ν 2963, 2927, 2870, 1624, 1346, 1323, 1141, 813, 558; **HRMS (API<sup>+</sup>):** calcd for [M+H]<sup>+</sup> C<sub>18</sub>H<sub>28</sub>BO<sub>2</sub>: 287.2182, found: 287.2175 (- 2.4 ppm). The data were consistent with those reported in the literature.<sup>4</sup>

### (E)-2-(4-methoxystyryl)-4,4,5,5-tetramethyl-1,3,2-dioxaborolane (6)

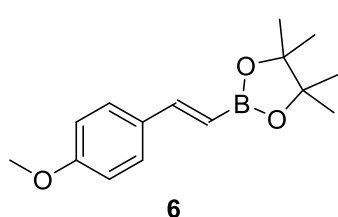

Prepared following to general procedure **A** in duplicate and combined prior to purification. **Yield:** 75% (75.2 mg, 0.30 mmol). Flash column chromatography: pentane/EtOAc: 98:2; Yellow amorphous solid; **R<sub>f</sub>**: 0.64 (petroleum ether/EtOAc: 9:1); **<sup>1</sup>H NMR (300 MHz, CDCl<sub>3</sub>):** δ 7.45-7.32 (m, 3H), 6.86 (d, *J* = 8.4 Hz, 2H), 6.02 (d, *J* = 18.4 Hz, 1H), 3.79 (s, 3H), 1.30 (s, 12H); **<sup>13</sup>C NMR (75 MHz, CDCl<sub>3</sub>):** δ 160.4, 149.2, 130.5, 128.6, 114.0, 83.3, 55.3, 24.9. The carbon bearing boron was not observed. **<sup>11</sup>B NMR (96 MHz, CDCl<sub>3</sub>):** δ 29.8; **IR (neat, cm<sup>-1</sup>):** ν 2980, 2927, 1624, 1510, 1353, 1322, 1250, 1212, 1136, 805; **HRMS (API<sup>+</sup>):** calcd for

[M+H]<sup>+</sup> C<sub>15</sub>H<sub>22</sub>BO<sub>3</sub>: 261.1662, found: 261.1668 (+ 2.3 ppm). The data were consistent with those reported in the literature.<sup>4</sup>

### (E)-2-(2-methoxystyryl)-4,4,5,5-tetramethyl-1,3,2-dioxaborolane (7)

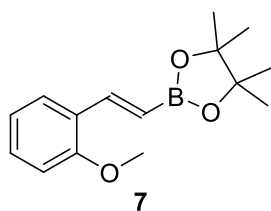

Prepared following to general procedure **A** in duplicate and combined prior to purification. **Yield:** 70% (72.4 mg, 0.28 mmol). Flash column chromatography: pentane/EtOAc: 95:5; Yellow amorphous solid; **R<sub>f</sub>**: 0.37 (petroleum ether/EtOAc: 9:1); **<sup>1</sup>H NMR (300 MHz, CDCl<sub>3</sub>):** δ 7.78 (d, *J* = 18.6 Hz, 1H), 7.55 (dd, *J* = 7.7, 1.3 Hz, 1H), 7.26 (td, *J* = 7.8, 1.5 Hz, 1H), 6.93 (t, *J* = 7.5 Hz, 1H), 6.86 (d, *J* = 8.3 Hz, 1H), 6.19 (d, *J* = 18.6 Hz, 1H), 3.84 (s, 3H), 1.31 (s, 12H); **<sup>13</sup>C NMR (75 MHz, CDCl<sub>3</sub>):** δ 157.4, 144.2, 130.1, 127.1, 126.6, 120.6, 110.9, 83.3, 55.4, 24.9. The carbon bearing boron was not observed. **<sup>11</sup>B NMR (96 MHz, CDCl<sub>3</sub>):** δ 29.8; **IR (neat, cm<sup>-1</sup>):** ν 2979, 2932, 1617, 1488, 1346, 1322, 1242, 1123, 1141, 1123, 848, 750, 730; **HRMS (API<sup>+</sup>):** calcd for [M+H]<sup>+</sup> C<sub>15</sub>H<sub>22</sub>BO<sub>3</sub>: 261.1662, found: 261.1655 (- 2.7 ppm).

### (E)-2-(2-([1,1'-biphenyl]-4-yl)vinyl)-4,4,5,5-tetramethyl-1,3,2-dioxaborolane (8)

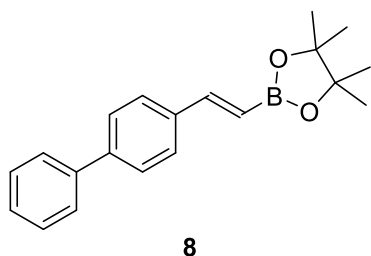

Prepared following to general procedure **A** in duplicate and combined prior to purification. **Yield:** 42% (51.5 mg, 0.17 mmol). Flash column chromatography: pentane/EtOAc: 30:1; White solid; **Mp:** 104-105 °C (pentane/EtOAc); **R<sub>f</sub>**: 0.41 (petroleum ether/EtOAc: 9:1); **<sup>1</sup>H NMR (300 MHz, CDCl<sub>3</sub>):** δ 7.63-7.59 (m, 6H), 7.50-7.47 (m, 1H), 7.45-7.43 (m, 2H), 7.38-7.33 (m, 1H), 6.23 (d, *J* = 18.4 Hz, 1H), 1.34 (s, 12H); **<sup>13</sup>C NMR (75 MHz, CDCl<sub>3</sub>):** δ 149.1, 141.7, 140.7, 136.6, 128.9, 127.6, 127.6, 127.4, 127.1, 83.5, 24.9. The carbon bearing boron was not observed. **<sup>11</sup>B NMR (96 MHz, CDCl<sub>3</sub>):** δ 29.1; **IR (neat, cm<sup>-1</sup>):** ν 3029, 2976, 2925, 2856, 1620, 1349, 1325, 1139, 1001, 818, 762, 699, 503; **HRMS (EI<sup>+</sup>):** calcd for [MS] C<sub>20</sub>H<sub>23</sub>BO<sub>2</sub>: 306.1791, found: 306.1784 (- 2.4 ppm). The data were consistent with those reported in the literature.<sup>4</sup>

### (E)-N,N-dimethyl-4-(2-(4,4,5,5-tetramethyl-1,3,2-dioxaborolan-2-yl)vinyl)aniline (9)

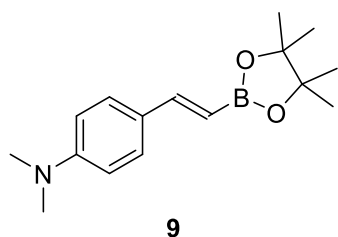

Prepared following to general procedure **A** in duplicate and combined prior to purification. **Yield:** 92% (100.2 mg, 0.37 mmol). Flash column chromatography: pentane/EtOAc: 30:1; Brown solid; **Mp:** 97-98 °C (pentane/EtOAc); **R<sub>f</sub>**: 0.48 (petroleum ether/EtOAc: 9:1); **<sup>1</sup>H NMR (300 MHz, CDCl<sub>3</sub>):** δ 7.40 (d, *J* = 8.6 Hz, 2H), 7.34 (d, *J* = 18.8 Hz, 1H), 6.66 (d, *J* = 8.5 Hz, 2H), 5.92 (d, *J* = 18.3 Hz, 1H), 2.98 (s, 6H), 1.31 (s, 12H); **<sup>13</sup>C NMR (75 MHz, CDCl<sub>3</sub>):** δ 151.1, 149.9, 128.5, 126.0, 112.1, 83.1, 40.4, 24.9. The carbon bearing boron was not observed. **<sup>11</sup>B NMR (96 MHz, CDCl<sub>3</sub>):** δ 30.1; **IR (neat, cm<sup>-1</sup>):** ν 2977, 2927, 1601, 1522, 1351, 1321, 1137, 800, 510; **HRMS (ESI<sup>+</sup>):** calcd for [M+H]<sup>+</sup> C<sub>16</sub>H<sub>25</sub>BNO<sub>2</sub>: 274.1978, found: 274.1987 (+ 3.3 ppm). The data were consistent with those reported in the literature.<sup>4</sup>

**(E)-3-(2-(4,4,5,5-tetramethyl-1,3,2-dioxaborolan-2-yl)vinyl)aniline (10)**

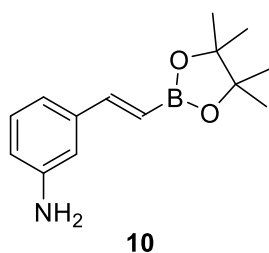

Prepared following to general procedure **A** in duplicate and combined prior to purification. **Yield:** 68% (66.5 mg, 0.27 mmol). Flash column chromatography: pentane/EtOAc: 9:1; Yellow oil; **R<sub>f</sub>:** 0.45 (petroleum ether/EtOAc: 7:3); **<sup>1</sup>H NMR (300 MHz, CDCl<sub>3</sub>):** δ 7.29 (d, *J* = 18.5 Hz, 1H), 7.10 (t, *J* = 7.7 Hz, 1H), 6.88 (d, *J* = 7.4 Hz, 1H), 6.78 (s, 1H), 6.61 (d, *J* = 7.5 Hz, 1H), 6.08 (d, *J* = 18.4 Hz, 1H), 3.71-3.44 (m, 2H), 1.29 (s, 12H); **<sup>13</sup>C NMR (75 MHz, CDCl<sub>3</sub>):** δ 149.9, 146.6, 138.6, 129.5, 118.0, 116.0, 113.5, 83.4, 24.9. The carbon bearing boron was not observed. **<sup>11</sup>B NMR (96 MHz, CDCl<sub>3</sub>):** δ 30.9; **IR (neat, cm<sup>-1</sup>):** ν 3377, 2981, 2933, 1735, 1623, 1350, 1321, 1141, 849, 775; **HRMS (ESI<sup>+</sup>):** calcd for [M+H]<sup>+</sup> C<sub>14</sub>H<sub>21</sub>BNO<sub>2</sub>: 246.1665, found: 246.1666 (+ 0.4 ppm). The data were consistent with those reported in the literature.<sup>7</sup>

**(E)-2-(2-(4,4,5,5-tetramethyl-1,3,2-dioxaborolan-2-yl)vinyl)aniline (11)**

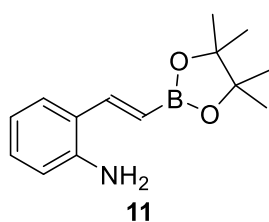

Prepared following to general procedure **A** in duplicate and combined prior to purification. **Yield:** 43% (42.4 mg, 0.17 mmol). Flash column chromatography: pentane/EtOAc: 87:13; Yellow oil; **R<sub>f</sub>:** 0.33 (petroleum ether/EtOAc: 8:2); **<sup>1</sup>H NMR (300 MHz, CDCl<sub>3</sub>):** δ 7.53 (d, *J* = 18.3 Hz, 1H), 7.42 (d, *J* = 7.70 Hz, 1H), 7.12 (t, *J* = 7.6 Hz, 1H), 6.77 (d, *J* = 7.5 Hz, 1H), 6.88 (d, *J* = 8.0 Hz, 1H), 6.08 (d, *J* = 18.2 Hz, 1H), 3.97 (s<sub>brd</sub>, 2H), 1.32 (s, 12H); **<sup>13</sup>C NMR (75 MHz, CDCl<sub>3</sub>):** δ 144.9, 144.6, 129.9, 127.5, 123.6, 118.9, 116.4, 83.4, 24.9. The carbon bearing boron was not observed. **<sup>11</sup>B NMR (96 MHz, CDCl<sub>3</sub>):** δ 31.0; **IR (neat, cm<sup>-1</sup>):** ν 3348, 2977, 2925, 2855, 1613, 1569, 1452, 1349, 1313, 1139, 849, 748; **HRMS (API<sup>+</sup>):** calcd for [M+H]<sup>+</sup> C<sub>14</sub>H<sub>21</sub>BNO<sub>2</sub>: 246.1665 found: 246.1670 (+ 2.0 ppm).

**(E)-4,4,5,5-tetramethyl-2-(4-(4,4,5,5-tetramethyl-1,3,2-dioxaborolan-2-yl)styryl)-1,3,2-dioxaborolane (12)**

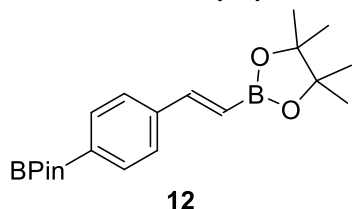

Prepared following to general procedure **A** in duplicate and combined prior to purification. **Yield:** 56% (80.0 mg, 0.22 mmol). Flash column chromatography: pentane/EtOAc: 97:3; White solid; **Mp:** 203-204 °C (pentane/EtOAc); **R<sub>f</sub>:** 0.64 (petroleum ether/EtOAc: 9:1); **<sup>1</sup>H NMR (300 MHz, CDCl<sub>3</sub>):** δ 7.78 (d, *J* = 7.9 Hz, 2H), 7.48 (d, *J* = 7.9 Hz, 2H), 7.40 (d, *J* = 18.5 Hz, 1H), 6.23 (d, *J* = 18.4 Hz, 1H), 1.33 (s, 12H), 1.30 (s, 12H); **<sup>13</sup>C NMR (75 MHz, CDCl<sub>3</sub>):** δ 149.5, 140.1, 135.1, 126.4, 83.9, 83.5, 25.0, 24.9. The carbons bearing the boron derivatives were not observed. **<sup>11</sup>B NMR (96 MHz, CDCl<sub>3</sub>):** δ 31.8; **IR (neat, cm<sup>-1</sup>):** ν 2980, 2925, 2854, 1623, 1348, 1326, 1139, 813, 638; **HRMS (API<sup>+</sup>):** calcd for [M+H]<sup>+</sup> C<sub>20</sub>H<sub>31</sub>B<sub>2</sub>O<sub>4</sub>: 357.2408, found: 357.2425 (+ 4.8 ppm). The data were consistent with those reported in the literature.<sup>4</sup>

**(E)-4-(2-(4,4,5,5-tetramethyl-1,3,2-dioxaborolan-2-yl)vinyl)phenylmethanol (13)**

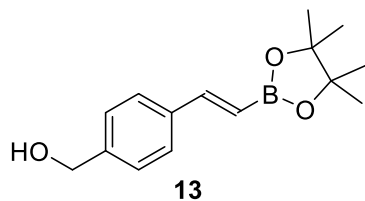

Prepared following to general procedure **A** in duplicate and combined prior to purification. **Yield:** 67% (70 mg, 0.27 mmol). Flash column chromatography: pentane/EtOAc: 8:2; White solid; **Mp:** 84-85 °C (pentane/EtOAc); **R<sub>f</sub>:** 0.2 (petroleum ether/EtOAc: 8:2); **<sup>1</sup>H NMR (300 MHz, CDCl<sub>3</sub>):** δ 7.42 (d, *J* = 8.1 Hz, 2H), 7.35 (d, *J* = 18.5 Hz, 1H), 7.28 (d, *J* = 8.0 Hz, 2H), 6.10 (d, *J* = 18.4 Hz, 1H), 4.62 (s, 2H), 2.64 (s<sub>brd</sub>, 1H), 1.29 (s, 12H); **<sup>13</sup>C NMR (75 MHz, CDCl<sub>3</sub>):** δ 149.2, 141.9, 136.8, 127.3, 127.2, 83.5, 64.8, 24.8. The carbon bearing boron was not

observed.  $^{11}\text{B}$  NMR (96 MHz,  $\text{CDCl}_3$ ):  $\delta$  29.4; IR (neat,  $\text{cm}^{-1}$ ):  $\nu$  3442, 2978, 2928, 2874, 1622, 1380, 1371, 1347, 1321, 1213, 1138, 968, 997, 844, 801, 490; HRMS (API $^+$ ): calcd for  $[\text{M}+\text{H}-\text{H}_2\text{O}]^+$   $\text{C}_{15}\text{H}_{20}\text{BO}_2$ : 243.1556, found: 243.1562 (+ 2.5 ppm).

#### (E)-4,4,5,5-tetramethyl-2-(4-(2-methyl-1,3-dioxolan-2-yl)styryl)-1,3,2-dioxaborolane (14)

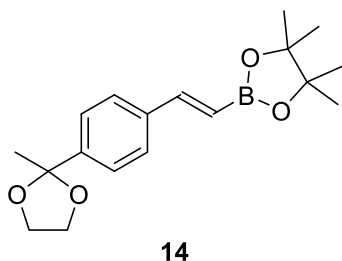

14

Prepared following to general procedure **A** in duplicate and combined prior to purification. **Yield:** 67% (84.9 mg, 0.27 mmol). Flash column chromatography: pentane/EtOAc: 9:1; White solid; **Mp:** 106-107 °C (pentane/EtOAc); **R<sub>f</sub>:** 0.40 (petroleum ether/EtOAc: 9:1);  $^1\text{H}$  NMR (300 MHz,  $\text{CDCl}_3$ ):  $\delta$  7.43-7.43 (m, 4H), 7.36 (d,  $J$  = 18.5 Hz, 1H), 6.14 (d,  $J$  = 18.4 Hz, 1H), 4.00 (t,  $J$  = 6.7 Hz, 2H), 3.73 (t,  $J$  = 6.7 Hz, 2H), 1.62 (s, 3H), 1.29 (s, 12H);  $^{13}\text{C}$  NMR (75 MHz,  $\text{CDCl}_3$ ):  $\delta$  149.1, 144.1, 137.1, 127.0, 125.6,

108.7, 83.4, 64.5, 27.5, 24.9. The carbon bearing boron was not observed.  $^{11}\text{B}$  NMR (96 MHz,  $\text{CDCl}_3$ ):  $\delta$  29.8; IR (neat,  $\text{cm}^{-1}$ ):  $\nu$  2977, 2929, 2853, 1622, 1370, 1345, 1328, 1197, 1142, 1124, 1033, 848, 812, 578; HRMS (API $^+$ ): calcd for  $[\text{M}+\text{H}]^+$   $\text{C}_{18}\text{H}_{26}\text{BO}_4$ : 317.1924, found: 317.1933 (+ 2.8 ppm). The data were consistent with those reported in the literature.<sup>4</sup>

#### (E)-2-(4-fluorostyryl)-4,4,5,5-tetramethyl-1,3,2-dioxaborolane (15)

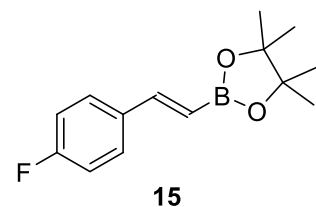

15

Prepared following to general procedure **A** in duplicate and combined prior to purification. **Yield:** 80% (79.4 mg, 0.32 mmol). Flash column chromatography: pentane/EtOAc: 40:1; Yellow amorphous solid; **R<sub>f</sub>:** 0.58 (petroleum ether/EtOAc: 9:1);  $^1\text{H}$  NMR (300 MHz,  $\text{CDCl}_3$ ):  $\delta$  7.48-7.43 (m, 2H), 7.35 (d,  $J$  = 18.4 Hz, 1H), 7.04-6.99 (m, 2H), 6.07 (d,  $J$  = 18.4 Hz, 1H), 1.31 (s, 12H);  $^{13}\text{C}$  NMR

(75 MHz,  $\text{CDCl}_3$ ):  $\delta$  163.3 (d,  $J_{\text{C-F}}$  = 249 Hz), 148.3, 133.8 (d,  $J_{\text{C-F}}$  = 3 Hz), 128.8 (d,  $J_{\text{C-F}}$  = 8 Hz), 115.7 (d,  $J_{\text{C-F}}$  = 22 Hz), 83.5, 24.9. The carbon bearing boron was not observed.  $^{11}\text{B}$  NMR (96 MHz,  $\text{CDCl}_3$ ):  $\delta$  29.8;  $^{19}\text{F}$  NMR (282 MHz,  $\text{CDCl}_3$ ):  $\delta$  -112.3; IR (neat,  $\text{cm}^{-1}$ ):  $\nu$  2978, 2927, 1623, 1600, 1507, 1349, 1324, 1209, 1223, 1141, 811; HRMS (EI $^+$ ): calcd for  $[\text{M}]$   $\text{C}_{14}\text{H}_{18}\text{BFO}_2$ : 248.1384, found: 248.1386 (+ 0.9 ppm). The data were consistent with those reported in the literature.<sup>4</sup>

#### (E)-2-(4-chlorostyryl)-4,4,5,5-tetramethyl-1,3,2-dioxaborolane (16)

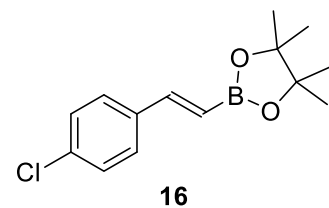

16

Prepared following to general procedure **A** in duplicate and combined prior to purification. **Yield:** 88% (93.2 mg, 0.35 mmol). Flash column chromatography: pentane/EtOAc: 40:1; White solid; **Mp:** 88-89 °C (pentane/EtOAc); **R<sub>f</sub>:** 0.72 (petroleum ether/EtOAc: 9:1);  $^1\text{H}$  NMR (300 MHz,  $\text{CDCl}_3$ ):  $\delta$  7.40 (d,  $J$  = 8.3 Hz, 2H), 7.36-7.28 (m, 3H), 6.13 (d,  $J$  = 18.4 Hz, 1H), 1.30 (s, 12H);  $^{13}\text{C}$  NMR (75

MHz,  $\text{CDCl}_3$ ):  $\delta$  148.1, 136.0, 134.7, 128.9, 128.3, 83.6, 24.9. The carbon bearing boron was not observed.  $^{11}\text{B}$  NMR (96 MHz,  $\text{CDCl}_3$ ):  $\delta$  29.7; IR (neat,  $\text{cm}^{-1}$ ):  $\nu$  2976, 2930, 1625, 1347, 1321, 1140, 802; HRMS (EI $^+$ ): calcd for  $[\text{M}]$   $\text{C}_{14}\text{H}_{18}\text{BClO}_2$ : 266.10589, found: 266.10620 (+ 1.2 ppm). The data were consistent with those reported in the literature.<sup>5</sup>



### (E)-2-(4-bromostyryl)-4,4,5,5-tetramethyl-1,3,2-dioxaborolane (17)

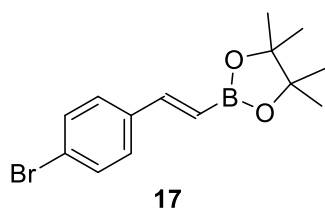

Prepared following to general procedure **A** in duplicate and combined prior to purification. **Yield:** 68% (83.3 mg, 0.27 mmol). Flash column chromatography: pentane/EtOAc: 99:1; Yellow solid; **Mp:** 88-89 °C (pentane/EtOAc); **R<sub>f</sub>:** 0.73 (petroleum ether/EtOAc: 9:1); **<sup>1</sup>H NMR (300 MHz, CDCl<sub>3</sub>):** δ 7.46-7.44 (d, *J* = 8.3 Hz, 2H), 7.35-7.28 (m, 3H), 6.14 (d, *J* = 18.4 Hz, 1H), 1.30 (s, 12H); **<sup>13</sup>C NMR (75 MHz, CDCl<sub>3</sub>):** δ 148.2, 136.5, 131.9, 128.6, 123.0, 83.6,

24.9. The carbon bearing boron was not observed. **<sup>11</sup>B NMR (96 MHz, CDCl<sub>3</sub>):** δ 29.7; **IR (neat, cm<sup>-1</sup>):** ν 2974, 2928, 1625, 1344, 1320, 1260, 799, 486; **HRMS (API<sup>+</sup>):** calcd for [M+H]<sup>+</sup> C<sub>14</sub>H<sub>19</sub>BBrO<sub>2</sub>: 309.0661, found: 309.0648 (- 4.2 ppm). The data were consistent with those reported in the literature.<sup>11</sup>

### (E)-2-(3-fluorostyryl)-4,4,5,5-tetramethyl-1,3,2-dioxaborolane (18)

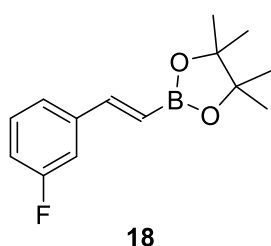

Prepared following to general procedure **A** in duplicate and combined prior to purification. **Yield:** 61% (60.1 mg, 0.24 mmol). Flash column chromatography: pentane/EtOAc: 40:1; Pale yellow oil; **R<sub>f</sub>:** 0.49 (petroleum ether/EtOAc: 9:1); **<sup>1</sup>H NMR (300 MHz, CDCl<sub>3</sub>):** δ 7.28 (d, *J* = 18.6 Hz, 1H), 7.23-7.16 (m, 2H), 7.12-7.09 (m, 1H), 6.94-6.89 (m, 1H), 6.10 (d, *J* = 18.4 Hz, 1H), 1.25 (s, 12H); **<sup>13</sup>C NMR (75 MHz, CDCl<sub>3</sub>):** δ 163.2 (d, *J*<sub>C-F</sub> = 246 Hz), 148.2 (d, *J*<sub>C-F</sub> = 2.5 Hz), 140.0 (d, *J*<sub>C-F</sub> = 7.5

Hz), 130.1 (d, *J*<sub>C-F</sub> = 8.3 Hz), 123.1 (d, *J*<sub>C-F</sub> = 2.7 Hz), 115.8 (d, *J*<sub>C-F</sub> = 21.5 Hz), 113.4 (d, *J*<sub>C-F</sub> = 21.6 Hz), 83.6, 24.9. The carbon bearing boron was not observed. **<sup>11</sup>B NMR (96 MHz, CDCl<sub>3</sub>):** δ 30.0; **<sup>19</sup>F NMR (282 MHz, CDCl<sub>3</sub>):** δ -113.5; **IR (neat, cm<sup>-1</sup>):** ν 2979, 2930, 1627, 1582, 1346, 1325, 1244, 1140, 849, 779; **HRMS (API<sup>+</sup>):** calcd for [M+H]<sup>+</sup> C<sub>14</sub>H<sub>19</sub>BFO<sub>2</sub>: 249.1462, found: 249.1467 (+ 2.0 ppm). The data were consistent with those reported in the literature.<sup>8</sup>

### (E)-2-(2,4-difluorostyryl)-4,4,5,5-tetramethyl-1,3,2-dioxaborolane (19)

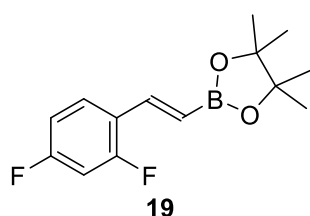

Prepared following to general procedure **A** in duplicate and combined prior to purification. **Yield:** 76% (80.3 mg, 0.30 mmol). Flash column chromatography: pentane/EtOAc: 40:1; Yellow oil; **R<sub>f</sub>:** 0.63 (petroleum ether/EtOAc: 9:1); **<sup>1</sup>H NMR (300 MHz, CDCl<sub>3</sub>):** δ 7.56-7.46 (m, 2H), 6.86-6.74 (m, 2H), 6.14 (d, *J* = 18.6 Hz, 1H), 1.29 (s, 12H); **<sup>13</sup>C NMR (75 MHz, CDCl<sub>3</sub>):** δ 163.2 (dd, <sup>1</sup>*J*<sub>C-F</sub> = 251 Hz, <sup>3</sup>*J*<sub>C-F</sub> = 12 Hz), 160.9 (dd, <sup>1</sup>*J*<sub>C-F</sub> = 254 Hz, <sup>3</sup>*J*<sub>C-F</sub> = 12 Hz), 140.4 (dd, <sup>1</sup>*J*<sub>C-F</sub> = 3 Hz, <sup>3</sup>*J*<sub>C-F</sub> = 1 Hz), 128.5 (dd, <sup>1</sup>*J*<sub>C-F</sub> = 10 Hz, <sup>3</sup>*J*<sub>C-F</sub> = 5 Hz), 122.0 (dd, <sup>1</sup>*J*<sub>C-F</sub> = 12 Hz, <sup>3</sup>*J*<sub>C-F</sub> = 4 Hz), 111.7 (dd, <sup>1</sup>*J*<sub>C-F</sub> = 22 Hz, <sup>3</sup>*J*<sub>C-F</sub> = 4 Hz), 104.2 (t, *J*<sub>C-F</sub> = 26 Hz), 83.6, 24.9. The carbon bearing boron was not observed. **<sup>11</sup>B NMR (96 MHz, CDCl<sub>3</sub>):** δ 29.7; **<sup>19</sup>F NMR (282 MHz, CDCl<sub>3</sub>):** δ -109.0 (d, <sup>4</sup>*J*<sub>F-F</sub> = 8 Hz), -113.4 (d, <sup>4</sup>*J*<sub>F-F</sub> = 8 Hz); **IR (neat, cm<sup>-1</sup>):** ν 2981, 2933, 1627, 1500, 1349, 1327, 1138, 967, 848; **HRMS (API<sup>+</sup>):** calcd for [M+H]<sup>+</sup> C<sub>14</sub>H<sub>18</sub>BF<sub>2</sub>O<sub>2</sub>: 267.1368, found: 267.1370 (+ 0.7 ppm). The data were consistent with those reported in the literature.<sup>9</sup>

### (E)-4,4,5,5-tetramethyl-2-(4-(trifluoromethyl)styryl)-1,3,2-dioxaborolane (20)

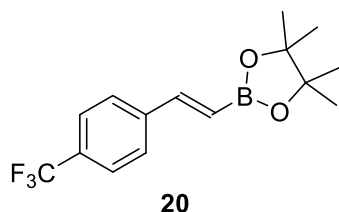

Prepared following to general procedure **A** in duplicate and combined prior to purification. **Yield:** 79% (94.3 mg, 0.32 mmol). Flash column chromatography: pentane/EtOAc: 40:1; Yellow amorphous solid; **R<sub>f</sub>:** 0.61 (petroleum ether/EtOAc: 9:1); **<sup>1</sup>H NMR (300 MHz, CDCl<sub>3</sub>):** δ 7.60-7.54 (m, 4H), 7.40 (d, *J* = 18.4 Hz, 1H), 6.26 (d, *J* = 18.4 Hz, 1H), 1.31 (s, 12H); **<sup>13</sup>C NMR (75 MHz, CDCl<sub>3</sub>):**

$\delta$  147.8, 140.9, 130.6 (q,  $J_{C-F}$  = 32 Hz), 127.3, 125.7 (q,  $J_{C-F}$  = 4 Hz), 124.2 (q,  $J_{C-F}$  = 272 Hz), 83.7, 24.9. The carbon bearing boron was not observed.  **$^{11}\text{B}$  NMR (96 MHz,  $\text{CDCl}_3$ ):**  $\delta$  29.7;  **$^{19}\text{F}$  NMR (282 MHz,  $\text{CDCl}_3$ ):**  $\delta$  -62.6; **IR (neat,  $\text{cm}^{-1}$ ):**  $\nu$  2980, 2927, 1628, 1614, 1321, 1105, 1066, 814; **HRMS (EI $^+$ ):** calcd for [MS]  $\text{C}_{15}\text{H}_{18}\text{BF}_3\text{O}_2$ : 298.13519, found: 298.13409 (- 3.7 ppm). The data were consistent with those reported in the literature.<sup>5</sup>

#### (E)-4-(2-(4,4,5,5-tetramethyl-1,3,2-dioxaborolan-2-yl)vinyl)benzaldehyde (21)

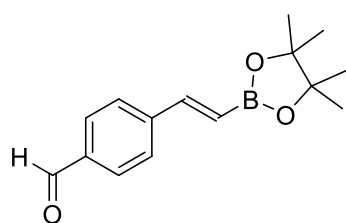

21

Prepared following to general procedure **A** in duplicate and combined prior to purification. **Yield:** 51% (52.1 mg, 0.20 mmol). Flash column chromatography: pentane/EtOAc: 92:8; White solid; **Mp:** 96-97 °C (pentane/EtOAc); **R<sub>f</sub>:** 0.34 (petroleum ether/EtOAc: 9:1);  **$^1\text{H}$  NMR (300 MHz,  $\text{CDCl}_3$ ):**  $\delta$  9.99 (s, 1H), 7.84 (d,  $J$  = 8.1 Hz, 2H), 7.61 (d,  $J$  = 8.1 Hz, 2H), 7.41 (d,  $J$  = 18.5 Hz, 1H), 6.31 (d,  $J$  = 18.4 Hz, 1H), 1.31 (s, 12H);  **$^{13}\text{C}$  NMR (75 MHz,  $\text{CDCl}_3$ ):**  $\delta$  191.8, 147.9, 143.3, 136.4, 130.2, 127.6, 83.8, 24.9. The carbon bearing boron was not observed.  **$^{11}\text{B}$  NMR (96 MHz,  $\text{CDCl}_3$ ):**  $\delta$  30.9; **IR (neat,  $\text{cm}^{-1}$ ):**  $\nu$  3976, 2928, 1686, 1623, 1370, 1348, 1327, 1139, 1124, 845, 804, 493; **HRMS (API $^+$ ):** calcd for [M+H+ACN] $^+$   $\text{C}_{17}\text{H}_{23}\text{BNO}_3$ : 300.1771, found: 300.1776 (+ 1.7 ppm).

#### Methyl (E)-4-(2-(4,4,5,5-tetramethyl-1,3,2-dioxaborolan-2-yl)vinyl)benzoate (22)

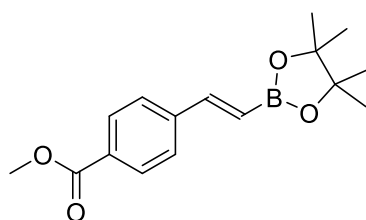

22

Prepared following to general procedure **A** using a charge of 2.5 F/mol. The reaction was run in duplicate and combined prior to purification. **Yield:** 60% (69.2 mg, 0.24 mmol). Flash column chromatography: pentane/EtOAc: 94:6; White solid; **Mp:** 111-112 °C (pentane/EtOAc); **R<sub>f</sub>:** 0.46 (petroleum ether/EtOAc: 9:1);  **$^1\text{H}$  NMR (300 MHz,  $\text{CDCl}_3$ ):**  $\delta$  7.99 (d,  $J$  = 8.3 Hz, 2H), 7.52 (d,  $J$  = 8.3 Hz, 2H), 7.40 (d,  $J$  = 18.5 Hz, 1H), 6.26 (d,  $J$  = 18.4 Hz, 1H), 3.89 (s, 3H), 1.30 (s, 12H);  **$^{13}\text{C}$  NMR (75 MHz,  $\text{CDCl}_3$ ):**  $\delta$  166.9, 148.2, 141.8, 130.2, 130.0, 127.0, 83.7, 52.2, 24.9. The carbon bearing boron was not observed.  **$^{11}\text{B}$  (96 MHz,  $\text{CDCl}_3$ ):**  $\delta$  29.7; **IR (neat,  $\text{cm}^{-1}$ ):**  $\nu$  2975, 2939, 1714, 1628, 1350, 1320, 1275, 1146, 1111, 759; **HRMS (API $^+$ ):** calcd for [M+H] $^+$   $\text{C}_{16}\text{H}_{22}\text{BO}_4$ : 289.1611, found: 289.1605 (- 2.1 ppm). The data were consistent with those reported in the literature.<sup>6</sup>

#### (E)-4,4,5,5-tetramethyl-2-(2-(naphthalen-2-yl)vinyl)-1,3,2-dioxaborolane (23)

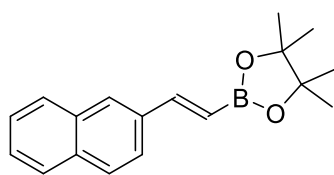

23

Prepared following to general procedure **A** using a charge of 2.5 F/mol. The reaction was run in duplicate and combined prior to purification **Yield:** 65% (72.8 mg, 0.26 mmol). Flash column chromatography: pentane/EtOAc: 98:2; Yellow solid; **Mp:** 70-71 °C (pentane/EtOAc); **R<sub>f</sub>:** 0.53 (petroleum ether/EtOAc: 9:1);  **$^1\text{H}$  NMR (300 MHz,  $\text{CDCl}_3$ ):**  $\delta$  7.86-7.80 (m, 4H), 7.74-7.71 (m, 1H), 7.60 (d,  $J$  = 18.4 Hz, 1H), 7.49-7.46 (m, 2H), 6.32 (d,  $J$  = 18.4 Hz, 1H), 1.35 (s, 12H);  **$^{13}\text{C}$  NMR (75 MHz,  $\text{CDCl}_3$ ):**  $\delta$  149.6, 135.1, 133.8, 133.5, 128.5, 128.4, 128.1, 127.8, 126.5, 126.4, 123.5, 83.5, 24.9. The carbon bearing boron was not observed.  **$^{11}\text{B}$  NMR (96 MHz,  $\text{CDCl}_3$ ):**  $\delta$  29.6; **IR (neat,  $\text{cm}^{-1}$ ):**  $\nu$  3058, 2925, 2854, 1620, 1366, 1327, 1141, 812, 475; **HRMS (API $^+$ ):** calcd for [M+H] $^+$   $\text{C}_{18}\text{H}_{22}\text{BO}_2$ : 281.1713, found: 281.1724 (+ 3.9 ppm). The data were consistent with those reported in the literature.<sup>10</sup>

**(E)-2-(2-(6-methoxynaphthalen-2-yl)vinyl)-4,4,5,5-tetramethyl-1,3,2-dioxaborolane (24)**

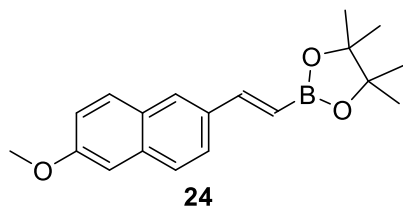

Prepared following to general procedure **A** using a charge of 2.5 F/mol. The reaction was run in duplicate and combined prior to purification. **Yield:** 84% (104.4 mg, 0.34 mmol). Flash column chromatography: pentane/EtOAc: 25:1; White solid; **Mp:** 140-141 °C (pentane/EtOAc); **R<sub>f</sub>:** 0.43 (petroleum ether/EtOAc: 9:1); **<sup>1</sup>H NMR (300 MHz, CDCl<sub>3</sub>):** δ 7.78 (s, 1H), 7.74-7.68 (m, 3H), 7.56 (d, *J* = 18.4 Hz, 1H), 7.15-7.10 (m, 2H), 6.25 (d, *J* = 18.4 Hz, 1H), 3.90 (s, 3H), 1.34 (s, 12H); **<sup>13</sup>C NMR (75 MHz, CDCl<sub>3</sub>):** δ 158.3, 149.8, 135.1, 133.0, 130.0, 128.9, 128.0, 127.2, 124.1, 119.1, 105.9, 83.4, 55.4, 24.9. The carbon bearing boron was not observed. **<sup>11</sup>B NMR (96 MHz, CDCl<sub>3</sub>):** δ 29.4; **IR (neat, cm<sup>-1</sup>):** ν 2975, 2926, 2855, 1619, 1392, 1355, 1328, 1259, 1202, 1142, 841, 813, 632, 472; **HRMS (API<sup>+</sup>):** calcd for [M+H]<sup>+</sup> C<sub>19</sub>H<sub>24</sub>BO<sub>3</sub>: 311.1819, found: 311.1826 (+ 2.2 ppm).

**(E)-3-(2-(4,4,5,5-tetramethyl-1,3,2-dioxaborolan-2-yl)vinyl)pyridine (25)**

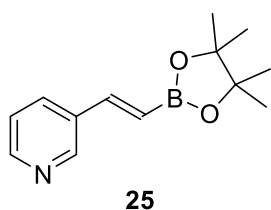

Prepared following to general procedure **A** in duplicate and combined prior to purification. **Yield:** 63% (58.3 mg, 0.25 mmol). Flash column chromatography: cyclohexane/EtOAc: 9:1; White solid; **Mp:** 53-55 °C (pentane/EtOAc); **R<sub>f</sub>:** 0.63 (petroleum ether/EtOAc: 7:3); **<sup>1</sup>H NMR (300 MHz, CDCl<sub>3</sub>):** δ 8.69 (s, 1H), 8.52 (m, 1H), 7.81 (d, *J* = 7.9 Hz, 1H), 7.38 (d, *J* = 18.5 Hz, 1H), 7.28 (t, *J* = 6.2 Hz, 1H), 6.25 (d, *J* = 18.5 Hz, 1H), 1.32 (s, 12H); **<sup>13</sup>C NMR (75 MHz, CDCl<sub>3</sub>):** δ 149.8, 149.2, 145.8, 133.3, 133.1, 123.7, 83.7, 24.9. The carbon bearing boron was not observed. **<sup>11</sup>B NMR (96 MHz, CDCl<sub>3</sub>):** δ 30.8; **IR (neat, cm<sup>-1</sup>):** ν 2979, 2928, 1627, 1417, 1352, 1329, 1141, 796, 645; **HRMS (ESI<sup>+</sup>):** calcd for [M+H]<sup>+</sup> C<sub>13</sub>H<sub>19</sub>BNO<sub>2</sub>: 232.1509, found: 232.1514 (+ 2.2 ppm). The data were consistent with those reported in the literature.<sup>11</sup>

**(E)-4-(4,4,5,5-tetramethyl-1,3,2-dioxaborolan-2-yl)but-3-en-1-ol (26)**

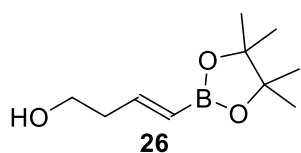

Prepared following to general procedure **A** in duplicate and combined prior to purification. **Yield:** 51% (40.3 mg, 0.20 mmol). Flash column chromatography: pentane/EtOAc: 8:2; Colourless oil; **R<sub>f</sub>:** 0.40 (petroleum ether/EtOAc: 8:2); **<sup>1</sup>H NMR (300 MHz, CDCl<sub>3</sub>):** δ 6.58 (dt, *J* = 18.0, 6.6 Hz, 1H), 5.53 (d, *J* = 18.0 Hz, 1H), 3.70 (t, *J* = 6.4 Hz, 2H), 2.44-2.38 (m, 2H), 1.72 (s<sub>brd</sub>, 1H), 1.24 (s, 12H); **<sup>13</sup>C NMR (75 MHz, CDCl<sub>3</sub>):** δ 150.2, 83.3, 61.3, 39.2, 24.9. The carbon bearing boron was not observed. **<sup>11</sup>B NMR (96 MHz, CDCl<sub>3</sub>):** δ 29.7; **IR (neat, cm<sup>-1</sup>):** ν 3429, 2978, 2931, 1639, 1358, 1317, 1142, 969, 849; **HRMS (API<sup>+</sup>):** calcd for [M+H]<sup>+</sup> C<sub>10</sub>H<sub>20</sub>BO<sub>3</sub>: 199.1506, found: 199.1515 (+ 4.5 ppm). The data were consistent with those reported in the literature.<sup>8</sup>

**(E)-1-phenyl-3-(4,4,5,5-tetramethyl-1,3,2-dioxaborolan-2-yl)prop-2-en-1-ol (27)**

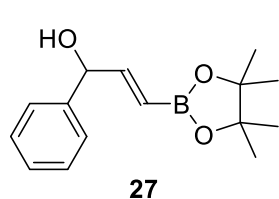

Prepared following to general procedure **A** in duplicate and combined prior to purification. **Yield:** 65% (67.2 mg, 0.26 mmol). Flash column chromatography: pentane/EtOAc: 85:15; Colorless amorphous solid; **R<sub>f</sub>:** 0.13 (petroleum ether/EtOAc: 9:1); **<sup>1</sup>H NMR (300 MHz, CDCl<sub>3</sub>):** δ 7.37-7.29 (m, 5H), 6.77 (dd, *J* = 18.0, 5.3 Hz, 1H), 5.75 (dd, *J* = 18.0, 1.0 Hz, 1H), 5.24 (d, *J* = 4.8 Hz, 1H), 2.41 (s, 1H), 1.27 (s, 12H); **<sup>13</sup>C NMR (75 MHz, CDCl<sub>3</sub>):** δ 153.9, 142.1, 128.6, 127.9, 126.6, 83.5, 76.2, 24.9, 24.8. The carbon

bearing boron was not observed.  $^{11}\text{B}$  NMR (96 MHz,  $\text{CDCl}_3$ ):  $\delta$  29.4; IR (neat,  $\text{cm}^{-1}$ ):  $\nu$  3445, 2976, 2870, 1632, 1396, 1358, 1331, 1141, 992, 847, 766, 706, 657, 544; HRMS (API<sup>+</sup>): calcd for  $[\text{M}+\text{H}]^+ \text{C}_{15}\text{H}_{22}\text{BO}_3$ : 261.1662, found: 261.1670 (+ 3.1 ppm). The data were consistent with those reported in the literature.<sup>12</sup>

**(E)-1,1-diphenyl-3-(4,4,5,5-tetramethyl-1,3,2-dioxaborolan-2-yl)prop-2-en-1-ol (28)**

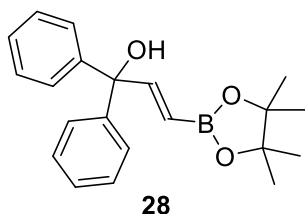

Prepared following to general procedure **A** in duplicate and combined prior to purification. **Yield:** 63% (84.8 mg, 0.25 mmol). Flash column chromatography: pentane/EtOAc: 9:1; White solid; **Mp:** 121-122 °C (pentane/EtOAc); **R<sub>f</sub>:** 0.23 (petroleum ether/EtOAc: 9:1);  $^1\text{H}$  NMR (300 MHz,  $\text{C}_6\text{D}_6$ ):  $\delta$  7.56 (d,  $J$  = 17.9 Hz, 1H), 7.41 (d,  $J$  = 7.0 Hz, 4H), 7.03 (dd,  $J$  = 15.8, 8.1 Hz, 6H), 6.17 (d,  $J$  = 17.9 Hz, 1H), 2.34 (s, 1H), 1.03 (s, 12H);  $^{13}\text{C}$  NMR (75 MHz,  $\text{C}_6\text{D}_6$ ):  $\delta$  157.6, 146.3, 128.4, 127.5, 127.3, 83.3, 80.1, 24.9. The carbon bearing boron was not observed.  $^{11}\text{B}$  NMR (96 MHz,  $\text{CDCl}_3$ ):  $\delta$  29.4; IR (neat,  $\text{cm}^{-1}$ ):  $\nu$  3481, 2981, 1637, 1351, 1321, 1141, 849, 698, 658; HRMS (API<sup>+</sup>): calcd for  $[\text{M}+\text{H}-\text{H}_2\text{O}]^+ \text{C}_{21}\text{H}_{24}\text{BO}_2$ : 319.1869, found: 319.1842 (- 8.5 ppm). The data were consistent with those reported in the literature.<sup>12</sup>

**(E)-9-(2-(4,4,5,5-tetramethyl-1,3,2-dioxaborolan-2-yl)vinyl)-9H-fluoren-9-ol (29)**

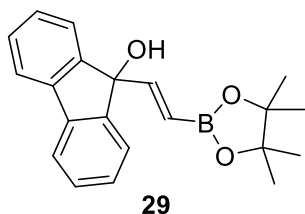

Prepared following to general procedure **A** in duplicate and combined prior to purification. **Yield:** 82% (109.8 mg, 0.33 mmol). Flash column chromatography: pentane/EtOAc: 85:15; Yellow amorphous solid; **R<sub>f</sub>:** 0.45 (petroleum ether/EtOAc: 8:2);  $^1\text{H}$  NMR (300 MHz,  $\text{CDCl}_3$ ):  $\delta$  7.61 (d,  $J$  = 7.2 Hz, 2H), 7.43 (d,  $J$  = 7.4 Hz, 2H), 7.38-7.27 (m, 4H), 6.63 (d,  $J$  = 18.0 Hz, 1H), 5.96 (d,  $J$  = 18.0 Hz, 1H), 2.59 (s, 1H), 1.21 (s, 12H);  $^{13}\text{C}$  NMR (75 MHz,  $\text{CDCl}_3$ ):  $\delta$  152.9, 147.7, 139.7, 129.2, 128.1, 124.8, 120.1, 83.3, 83.2 24.8. The carbon bearing boron was not observed.  $^{11}\text{B}$  NMR (96 MHz,  $\text{CDCl}_3$ ):  $\delta$  29.4; IR (neat,  $\text{cm}^{-1}$ ):  $\nu$  3376, 3064, 2978, 2933, 2244, 1636, 1346, 1142, 732; HRMS (API<sup>+</sup>): calcd for  $[\text{M}+\text{H}-\text{H}_2\text{O}]^+ \text{C}_{21}\text{H}_{22}\text{BO}_2$ : 317.1713, found: 317.1723 (+ 3.2 ppm). The data were consistent with those reported in the literature.<sup>12</sup>

**(E)-2,8-dimethyl-5-(2-(4,4,5,5-tetramethyl-1,3,2-dioxaborolan-2-yl)vinyl)nonan-5-ol (30)**

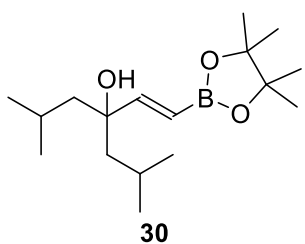

Prepared following to general procedure **A** in duplicate and combined prior to purification. **Yield:** 57% (67.2 mg, 0.23 mmol). Flash column chromatography: pentane/EtOAc: 9:1; White amorphous solid; **R<sub>f</sub>:** 0.26 (petroleum ether/EtOAc: 9:1);  $^1\text{H}$  NMR (300 MHz,  $\text{CDCl}_3$ ):  $\delta$  6.58 (d,  $J$  = 18.2 Hz, 1H), 5.58 (d,  $J$  = 18.2 Hz, 1H), 1.72-1.63 (m, 2H), 1.43-1.39 (m, 4H), 1.24 (s, 12H), 0.89 (d,  $J$  = 6.6 Hz, 6H), 0.85 (d,  $J$  = 6.7 Hz, 6H);  $^{13}\text{C}$  NMR (75 MHz,  $\text{CDCl}_3$ ):  $\delta$  159.5, 83.2, 50.4, 25.1, 24.9, 24.7, 24.0. The carbon bearing boron was not observed.  $^{11}\text{B}$  NMR (96 MHz,  $\text{CDCl}_3$ ):  $\delta$  29.8; IR (neat,  $\text{cm}^{-1}$ ):  $\nu$  3503, 2979, 2952, 2869, 1638, 1349, 1278, 1143, 1123, 849; HRMS (API<sup>+</sup>): calcd for  $[\text{M}+\text{H}-\text{H}_2\text{O}]^+ \text{C}_{17}\text{H}_{32}\text{BO}_2$ : 279.2495, found: 279.2501 (+ 2.1 ppm).

**(E)-2-(3-(4,4,5,5-tetramethyl-1,3,2-dioxaborolan-2-yl)allyl)isoindoline-1,3-dione (31)**

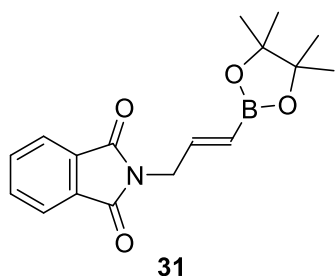

Prepared following to general procedure **A** in duplicate and combined prior to purification. **Yield:** 52% (65.2 mg, 0.21 mmol). Flash column chromatography: pentane/EtOAc: 88:12; Colourless oil; **R<sub>f</sub>:** 0.39 (petroleum ether/EtOAc: 8:2); **<sup>1</sup>H NMR (300 MHz, CDCl<sub>3</sub>):** δ 7.82-7.79 (m, 2H), 7.69-7.66 (m, 2H), 6.55 (dt, *J* = 18.0, 4.5 Hz, 1H), 5.43 (d, *J* = 18.0 Hz, 1H), 4.33 (dd, *J* = 4.4, 1.6 Hz, 2H), 1.18 (s, 12H); **<sup>13</sup>C NMR (75 MHz, CDCl<sub>3</sub>):** δ 167.9, 145.3, 134.1, 132.1, 123.4, 83.4, 41.1, 24.8. The carbon bearing boron

was not observed. **<sup>11</sup>B NMR (96 MHz, CDCl<sub>3</sub>):** δ 29.2; **IR (neat, cm<sup>-1</sup>):** ν 3474, 2979, 2929, 1773, 1711, 1645, 1389, 1360, 1322, 1141, 953, 848, 713, 529; **HRMS (API<sup>+</sup>):** calcd for [M+H]<sup>+</sup> C<sub>17</sub>H<sub>21</sub>BNO<sub>4</sub>: 314.1564, found: 314.1568 (+ 1.3 ppm).

**(E)-2-(2-(cyclohex-1-en-1-yl)vinyl)-4,4,5,5-tetramethyl-1,3,2-dioxaborolane (32)**

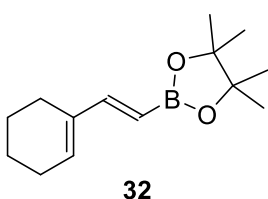

Prepared following to general procedure **A** in duplicate and combined prior to purification. **Yield:** 81% (75.8 mg, 0.32 mmol). Flash column chromatography: pentane/EtOAc: 98:2; Colourless oil; **R<sub>f</sub>:** 0.55 (petroleum ether/EtOAc: 9:1); **<sup>1</sup>H NMR (300 MHz, CDCl<sub>3</sub>):** δ 7.00 (d, *J* = 18.3 Hz, 1H), 5.94 (app s, 1H), 5.40 (d, *J* = 18.2 Hz, 1H), 2.13-2.12 (m, 4H), 1.64-1.56 (m, 4H), 1.25 (s, 12H); **<sup>13</sup>C NMR (75 MHz, CDCl<sub>3</sub>):**

δ 153.3, 137.2, 134.3, 83.1, 26.2, 24.8, 23.8, 22.5, 22.4. The carbon bearing boron was not observed. **<sup>11</sup>B NMR (96 MHz, CDCl<sub>3</sub>):** δ 30.0; **IR (neat, cm<sup>-1</sup>):** ν 2978, 2928, 2860, 1607, 1341, 1334, 1319, 1143, 970, 850, 771; **HRMS (API<sup>+</sup>):** calcd for [M+H]<sup>+</sup> C<sub>14</sub>H<sub>24</sub>BO<sub>2</sub>: 235.1869, found: 235.1873 (+ 1.7 ppm). The data were consistent with those reported in the literature.<sup>11</sup>

**(E)-2-(2-(cyclopropyl)vinyl)-4,4,5,5-tetramethyl-1,3,2-dioxaborolane (33)**

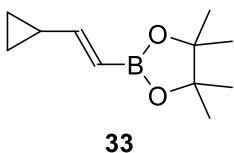

Prepared following to general procedure **A** in duplicate and combined prior to purification. **Yield:** 39% (30.4 mg, 0.16 mmol). Flash column chromatography: Cyclohexane/EtOAc: 99:1; Colourless oil; **R<sub>f</sub>:** 0.83 (petroleum ether/EtOAc: 9:1); **<sup>1</sup>H NMR (300 MHz, CDCl<sub>3</sub>):** δ 6.07 (dd, *J* = 17.8, 9.3 Hz, 1H), 5.49 (d, *J* = 17.8 Hz, 1H), 1.59-1.47 (m, 1H), 1.25 (s, 12H), 0.83-0.77 (m, 2H), 0.56-0.51 (m, 2H); **<sup>13</sup>C NMR (75 MHz, CDCl<sub>3</sub>):** δ 158.7, 83.1, 24.9, 17.2, 8.0. The carbon bearing boron was not observed. **<sup>11</sup>B NMR (96 MHz, CDCl<sub>3</sub>):** δ 30.4; **IR (neat, cm<sup>-1</sup>):** ν 2979, 2930, 1633, 1380, 1326, 1313, 1297, 1139, 970, 947, 845, 653; **HRMS (API<sup>+</sup>):** calcd for [M+H]<sup>+</sup> C<sub>11</sub>H<sub>20</sub>BO<sub>2</sub>: 195.1556, found: 195.1547 (- 4.6 ppm). The data were consistent with those reported in the literature.<sup>11</sup>

**(E)-4,4,5,5-tetramethyl-2-(3-phenylprop-1-en-1-yl)-1,3,2-dioxaborolane & 4,4,5,5-tetramethyl-2-(3-phenylprop-1-en-2-yl)-1,3,2-dioxaborolane (34)**

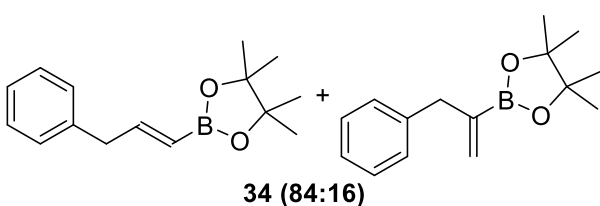

Prepared following to general procedure **A** in duplicate and combined prior to purification. **Yield:** 55% (53.2 mg, 0.22 mmol). Flash column chromatography: pentane/EtOAc: 97:3; Colorless oil; **R<sub>f</sub>:** 0.56 (petroleum ether/EtOAc: 9:1);

**MAJOR:** **<sup>1</sup>H NMR (300 MHz, CDCl<sub>3</sub>):** δ 7.32-7.22 (m, 3H), 7.20- 7.17 (m, 2H), 6.78 (dd, *J* = 17.8, 6.3 Hz, 1H), 5.46 (d, *J* = 17.8 Hz, 1H), 3.49 (d, *J* = 5.3 Hz, 2H), 1.26 (s, 12H); **<sup>13</sup>C NMR (75 MHz, CDCl<sub>3</sub>):** δ 152.6, 139.2, 129.0, 128.5, 126.3, 83.2, 42.4, 24.9. The carbon bearing

boron was not observed.  $^{11}\text{B}$  NMR (96 MHz,  $\text{CDCl}_3$ ):  $\delta$  29.7; IR (neat,  $\text{cm}^{-1}$ ):  $\nu$  3028, 2978, 2929, 1636, 1359, 1319, 1141, 970, 851, 698; HRMS (API $^+$ ): calcd for  $[\text{M}+\text{H}]^+$   $\text{C}_{15}\text{H}_{22}\text{BO}_2$ : 245.1713, found: 245.1711 (- 0.8 ppm). The data were consistent with those reported in the literature.<sup>5</sup>

**MINOR:**  $^1\text{H}$  NMR (300 MHz,  $\text{CDCl}_3$ ):  $\delta$  7.32-7.22 (m, 3H), 7.20- 7.17 (m, 2H), 5.85 (app s, 1H), 5.54 (app s, 1H), 3.49 (d,  $J$  = 5.2 Hz, 2H), 1.22 (s, 12H);  $^{13}\text{C}$  NMR (75 MHz,  $\text{CDCl}_3$ ):  $\delta$  140.8, 129.9, 129.3, 128.2, 125.8, 83.6, 41.5, 24.8. The carbon bearing boron was not observed.

**(E)-2-(2-cyclohexylvinyl)-4,4,5,5-tetramethyl-1,3,2-dioxaborolane & 2-(1-cyclohexyl vinyl)-4,4,5,5-tetramethyl-1,3,2-dioxaborolane (35)**

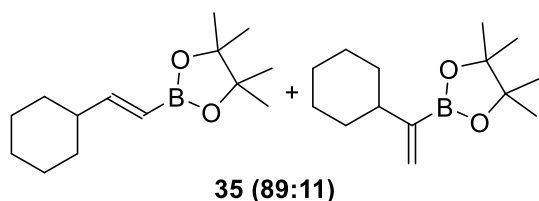

Prepared following to general procedure A in duplicate and combined prior to purification. **Yield:** 58% (54.9 mg, 0.23 mmol, ratio 88:12). Flash column chromatography: pentane/EtOAc: 99:1; Colourless oil;  $R_f$ : 0.78 (petroleum ether/EtOAc: 9:1);

**MAJOR:**  $^1\text{H}$  NMR (300 MHz,  $\text{CDCl}_3$ ):  $\delta$  6.56 (dd,  $J$  = 18.2, 6.1 Hz, 1H), 5.35 (d,  $J$  = 18.2 Hz, 1H), 2.02-1.99 (m, 1H), 1.73-1.61 (m, 6H), 1.25 (s, 12H), 1.19-1.02 (m, 4H);  $^{13}\text{C}$  NMR (75 MHz,  $\text{CDCl}_3$ ):  $\delta$  160.0, 83.1, 43.4, 32.0, 26.3, 26.1, 24.9. The carbon bearing boron was not observed.  $^{11}\text{B}$  NMR (96 MHz,  $\text{CDCl}_3$ ):  $\delta$  29.7; IR (neat,  $\text{cm}^{-1}$ ):  $\nu$  2978, 2924, 2852, 1635, 1370, 1348, 1319, 1144, 970, 850; HRMS (API $^+$ ): calcd for  $[\text{M}+\text{H}]^+$   $\text{C}_{14}\text{H}_{26}\text{BO}_2$ : 237.2026, found: 237.2022 (- 1.7 ppm). The data were consistent with those reported in the literature.<sup>11</sup>

**MINOR:**  $^1\text{H}$  NMR (300 MHz,  $\text{CDCl}_3$ ):  $\delta$  5.68 (app s, 1H), 5.53 (app s, 1H), 2.02-1.99 (m, 1H), 1.73-1.61 (m, 6H), 1.25 (s, 12H), 1.19-1.02 (m, 4H);  $^{13}\text{C}$  NMR (75 MHz,  $\text{CDCl}_3$ ):  $\delta$  126.0, 83.3, 42.9, 32.6, 26.8, 26.4, 24.8. The carbon bearing boron was not observed.

**(E)-2-(2-cyclopentylvinyl)-4,4,5,5-tetramethyl-1,3,2-dioxaborolane & 2-(1-cyclopentyl vinyl)-4,4,5,5-tetramethyl-1,3,2-dioxaborolane (36)**

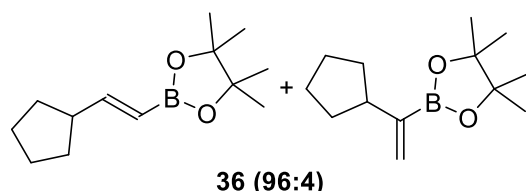

Prepared following to general procedure A in duplicate and combined prior to purification. **Yield:** 41% (36.6 mg, 0.16 mmol, ratio 96:4). Flash column chromatography: pentane/EtOAc: 99:1; Colourless oil;  $R_f$ : 0.79 (petroleum ether/EtOAc: 9:1);

**MAJOR:**  $^1\text{H}$  NMR (300 MHz,  $\text{CDCl}_3$ ):  $\delta$  6.60 (dd,  $J$  = 17.9, 7.2 Hz, 1H), 5.39 (d,  $J$  = 17.9 Hz, 1H), 2.57-2.44 (m, 1H), 1.78-1.76 (m, 2H), 1.64-1.55 (m, 4H), 1.39-1.33 (m, 2H), 1.26 (s, 12H);  $^{13}\text{C}$  NMR (75 MHz,  $\text{CDCl}_3$ ):  $\delta$  159.1, 83.1, 46.3, 32.5, 25.4, 24.9. The carbon bearing boron was not observed.  $^{11}\text{B}$  NMR (96 MHz,  $\text{CDCl}_3$ ):  $\delta$  30.8; IR (neat,  $\text{cm}^{-1}$ ):  $\nu$  2978, 2953, 2869, 1635, 1367, 1317, 1143, 970, 849; HRMS (API $^+$ ): calcd for  $[\text{M}+\text{H}]^+$   $\text{C}_{13}\text{H}_{24}\text{BO}_2$ : 223.1869, found: 223.1880 (+ 4.9 ppm). The data were consistent with those reported in the literature.<sup>11</sup>

**MINOR:**  $^1\text{H}$  NMR (300 MHz,  $\text{CDCl}_3$ ):  $\delta$  5.69 (app s, 1H), 5.58 (app s, 1H), 2.57-2.44 (m, 1H), 1.78-1.76 (m, 2H), 1.64-1.55 (m, 4H), 1.39-1.33 (m, 2H), 1.26 (s, 12H);  $^{13}\text{C}$  NMR (75 MHz,  $\text{CDCl}_3$ ):  $\delta$  126.2, 83.3, 45.7, 32.2, 25.2, 24.9. The carbon bearing boron was not observed.

**(E)-2-(3-cyclohexylprop-1-en-1-yl)-4,4,5,5-tetramethyl-1,3,2-dioxaborolane & 2-(3-cyclohexylprop-1-en-2-yl)-4,4,5,5-tetramethyl-1,3,2-dioxaborolane (37)**

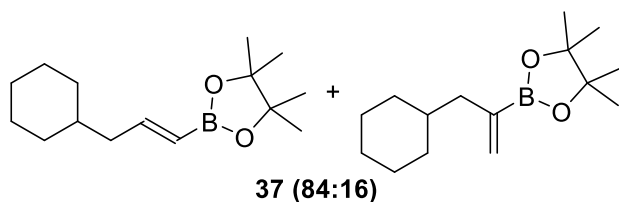

Prepared following to general procedure **A** in duplicate and combined prior to purification. **Yield:** 56% (56.0 mg, 0.22 mmol, ratio 89:11). Flash column chromatography: pentane/EtOAc: 99:1; Colourless oil; **R<sub>f</sub>:** 0.78 (petroleum

ether/EtOAc: 9:1);

**MAJOR:** <sup>1</sup>H NMR (300 MHz, CDCl<sub>3</sub>): δ 6.59 (dt, *J* = 17.7, 6.7 Hz, 1H), 5.39 (d, *J* = 17.6 Hz, 1H), 2.04 (t, *J* = 6.7 Hz, 2H), 1.71-1.64 (m, 4H), 1.38-1.33 (m, 1H), 1.26 (s, 12H), 1.18-1.04 (m, 4H), 0.93-0.82 (m, 2H); <sup>13</sup>C NMR (75 MHz, CDCl<sub>3</sub>): δ 153.7, 83.1, 44.3, 37.3, 33.3, 26.6, 26.4, 24.9. The carbon bearing boron was not observed. <sup>11</sup>B (96 MHz, CDCl<sub>3</sub>): δ 30.1; **IR (neat, cm<sup>-1</sup>):** ν 2978, 2922, 2852, 1638, 1360, 1316, 1144, 971, 850; **HRMS (API<sup>+</sup>):** calcd for [M+H]<sup>+</sup> C<sub>15</sub>H<sub>28</sub>BO<sub>2</sub>: 251.2182, found: 251.2176 (- 2.4 ppm). The data were consistent with those reported in the literature.<sup>11</sup>

**MINOR:** <sup>1</sup>H NMR (300 MHz, CDCl<sub>3</sub>): δ 5.77 (app s, 1H), 5.54 (app s, 1H), 2.04 (t, *J* = 6.7 Hz, 2H), 1.71-1.64 (m, 4H), 1.38-1.33 (m, 1H), 1.26 (s, 12H), 1.18-1.04 (m, 4H), 0.93-0.82 (m, 2H); <sup>13</sup>C NMR (75 MHz, CDCl<sub>3</sub>): δ 130.1, 83.4, 43.4, 37.8, 29.8, 26.8, 26.5, 24.8. The carbon bearing boron was not observed.

**(E)-2-(hept-1-en-1-yl)-4,4,5,5-tetramethyl-1,3,2-dioxaborolane & 2-(hept-1-en-2-yl)-4,4,5,5-tetramethyl-1,3,2-dioxaborolane (38)**

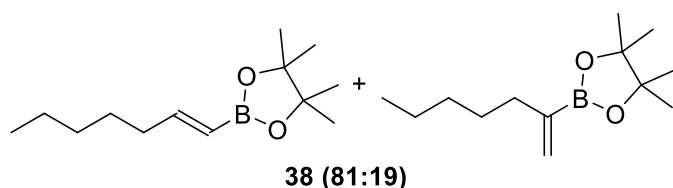

Prepared following to general procedure **A** in duplicate and combined prior to purification. **Yield:** 46% (41.1 mg, 0.18 mmol, ratio 81:19). Flash column chromatography: pentane/EtOAc:

98:2; Colourless oil; **R<sub>f</sub>:** 0.80 (petroleum ether/EtOAc: 9:1);

**MAJOR:** <sup>1</sup>H NMR (300 MHz, CDCl<sub>3</sub>): δ 6.62 (dt, *J* = 17.9, 6.4 Hz, 1H), 5.41 (d, *J* = 18.0 Hz, 1H), 2.13 (dd, *J* = 13.3, 6.4 Hz, 2H), 1.42-1.29 (m, 6H), 1.25 (s, 12H), 0.88-0.84 (m, 3H); <sup>13</sup>C NMR (75 MHz, CDCl<sub>3</sub>): δ 155.0, 83.1, 35.9, 31.5, 28.0, 24.9, 22.7, 14.1. The carbon bearing boron was not observed. <sup>11</sup>B NMR (96 MHz, CDCl<sub>3</sub>): δ 29.6; **IR (neat, cm<sup>-1</sup>):** ν 2978, 2959, 2927, 2858, 1638, 1360, 1316, 1143, 972, 850; **HRMS (API<sup>+</sup>):** calcd for [M+H]<sup>+</sup> C<sub>13</sub>H<sub>26</sub>BO<sub>2</sub>: 225.2026, found: 225.2025 (- 0.4 ppm). The data were consistent with those reported in the literature.<sup>13</sup>

**MINOR:** <sup>1</sup>H NMR (300 MHz, CDCl<sub>3</sub>): δ 5.72 (app s, 1H), 5.57 (app s, 1H), 2.13 (dd, *J* = 13.3, 6.4 Hz, 2H), 1.42-1.29 (m, 6H), 1.25 (s, 12H), 0.88-0.84 (m, 3H); <sup>13</sup>C NMR (75 MHz, CDCl<sub>3</sub>): δ 128.8, 83.4, 35.4, 31.6, 29.0, 24.9, 22.7, 14.2. The carbon bearing boron was not observed. The data were consistent with those reported in the literature.<sup>14</sup>

**(E)-2-(4-bromobut-1-en-1-yl)-4,4,5,5-tetramethyl-1,3,2-dioxaborolane & 2-(4-bromobut-1-en-2-yl)-4,4,5,5-tetramethyl-1,3,2-dioxaborolane (39)**

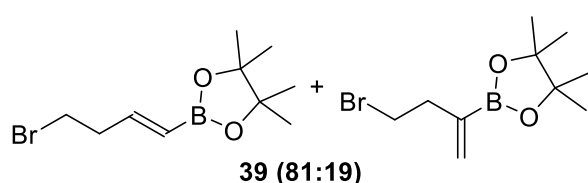

Prepared following to general procedure **A** in duplicate and combined prior to purification.

**MAJOR:** **Yield:** 33% (33.9 mg, 0.13 mmol). Flash column chromatography: pentane /EtOAc: 98:2; Colourless oil; **R<sub>f</sub>:** 0.57

(petroleum ether/EtOAc: 9:1);  $^1\text{H NMR}$  (300 MHz,  $\text{CDCl}_3$ ):  $\delta$  6.54 (dt,  $J = 18.0, 6.3$  Hz, 1H), 5.53 (d,  $J = 18.0$  Hz, 1H), 3.42 (t,  $J = 7.2$  Hz, 2H), 2.75-2.68 (m, 2H), 1.26 (s, 12H);  $^{13}\text{C NMR}$  (75 MHz,  $\text{CDCl}_3$ ):  $\delta$  149.7, 83.4, 38.9, 30.9, 24.9. The carbon bearing boron was not observed.  $^{11}\text{B NMR}$  (96 MHz,  $\text{CDCl}_3$ ):  $\delta$  30.0; IR (neat,  $\text{cm}^{-1}$ ):  $\nu$  2976, 2924, 2855, 1638, 1361, 1324, 1141, 847; HRMS (API<sup>+</sup>): calcd for  $[\text{M}+\text{H}]^+$   $\text{C}_{10}\text{H}_{19}\text{BBrO}_2$ : 261.0661, found: 261.0670 (+ 3.4 ppm). The data were consistent with those reported in the literature.<sup>15</sup>

**MINOR:** Yield: 18% (18.5 mg, 0.07 mmol). Flash column chromatography: pentane/EtOAc: 99:1; Colourless oil;  $R_f$ : 0.63 (petroleum ether/EtOAc: 9:1);  $^1\text{H NMR}$  (300 MHz,  $\text{CDCl}_3$ ):  $\delta$  5.92 (app s, 1H), 5.71 (app s, 1H), 3.50 (t,  $J = 7.4$  Hz, 2H), 2.70 (t,  $J = 7.2$  Hz, 2H), 1.26 (s, 12H);  $^{13}\text{C NMR}$  (75 MHz,  $\text{CDCl}_3$ ):  $\delta$  132.5, 83.8, 39.1, 32.9, 24.9. The carbon bearing boron was not observed.  $^{11}\text{B NMR}$  (96 MHz,  $\text{CDCl}_3$ ):  $\delta$  30.3; IR (neat,  $\text{cm}^{-1}$ ):  $\nu$  2978, 2926, 2855, 1369, 1311, 1141; HRMS (EI<sup>+</sup>): calcd for  $[\text{MS}]$   $\text{C}_{10}\text{H}_{18}\text{BBrO}_2$ : 260.0583, found: 260.0582 (- 0.4 ppm).

**(Z)-4,4,5,5-tetramethyl-2-(1-phenylprop-1-en-2-yl)-1,3,2-dioxaborolane & (Z)-4,4,5,5-tetramethyl-2-(1-phenylprop-1-en-1-yl)-1,3,2-dioxaborolane (40)**

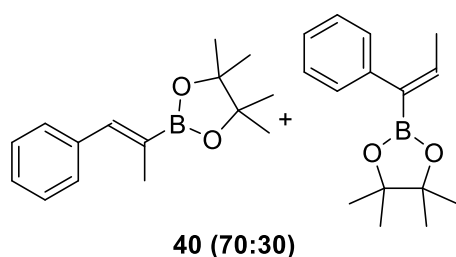

Prepared following to general procedure B. Yield: 49% (24 mg, 0.10 mmol, ratio 70:30). Flash column chromatography: pentane/EtOAc: 98:2; Colourless oil;  $R_f$ : 0.67 (petroleum ether/EtOAc: 9:1);

**MAJOR:**  $^1\text{H NMR}$  (300 MHz,  $\text{C}_6\text{D}_6$ ):  $\delta$  7.75 (s, 1H), 7.34 (d,  $J = 7.2$  Hz, 2H), 7.14-7.08 (m, 2H), 7.06-6.99 (m, 1H), 2.20 (d,  $J = 0.9$  Hz, 3H), 1.12 (s, 12H);  $^{13}\text{C NMR}$  (75 MHz,  $\text{CDCl}_3$ ):  $\delta$  142.5, 138.0, 129.5, 128.1, 127.2, 83.6, 25.0, 16.0. The carbon bearing boron was not observed.  $^{11}\text{B NMR}$  (96 MHz,  $\text{CDCl}_3$ ):  $\delta$  31.2; IR (neat,  $\text{cm}^{-1}$ ):  $\nu$  2978, 2930, 2865, 1616, 1367, 1337, 1307, 1144, 1103, 751, 699, 667; HRMS (API<sup>+</sup>): calcd for  $[\text{M}+\text{H}]^+$   $\text{C}_{15}\text{H}_{22}\text{BO}_2$ : 245.1713, found: 245.1722 (+ 3.7 ppm).

**MINOR:**  $^1\text{H NMR}$  (300 MHz,  $\text{C}_6\text{D}_6$ ):  $\delta$  7.37-7.33 (m, 1H), 7.24 (t,  $J = 7.6$  Hz, 2H), 7.14-7.08 (m, 2H), 7.06-6.99 (m, 1H), 2.67 (d,  $J = 7.0$  Hz, 3H), 1.06 (s, 12H);  $^{13}\text{C NMR}$  (75 MHz,  $\text{CDCl}_3$ ):  $\delta$  142.8, 139.9, 129.2, 127.8, 126.0, 83.5, 24.8, 16.1. The carbon bearing boron was not observed.

**(Z)-2-(1,2-diphenylvinyl)-4,4,5,5-tetramethyl-1,3,2-dioxaborolane (41)**

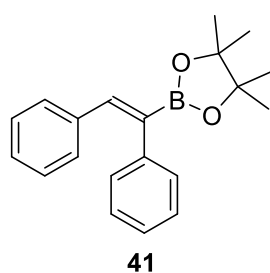

Prepared following to general procedure B. Yield: 58% (35.8 mg, 0.12 mmol). Flash column chromatography: pentane/EtOAc: 98:2; Colourless oil;  $R_f$ : 0.67 (petroleum ether/EtOAc: 9:1);  $^1\text{H NMR}$  (300 MHz,  $\text{C}_6\text{D}_6$ ):  $\delta$  7.89 (s, 1H), 7.45 (d,  $J = 7.3$  Hz, 2H), 7.23-7.19 (m, 4H), 7.09-7.06 (m, 1H), 6.94-6.92 (m, 3H), 1.12 (s, 12H);  $^{13}\text{C NMR}$  (75 MHz,  $\text{CDCl}_3$ ):  $\delta$  143.4, 140.5, 137.0, 130.0, 128.9, 128.3, 127.9, 127.7, 126.3, 83.8, 24.9. The carbon bearing boron was not observed.  $^{11}\text{B NMR}$  (96 MHz,  $\text{CDCl}_3$ ):  $\delta$  29.9; IR (neat,  $\text{cm}^{-1}$ ):  $\nu$  3053, 2988, 2929, 1606, 1377, 1342, 1318, 1140, 694, 683, 481; HRMS (API<sup>+</sup>): calcd for  $[\text{M}+\text{H}]^+$   $\text{C}_{20}\text{H}_{24}\text{BO}_2$ : 307.1869, found: 307.1877 (+ 2.6 ppm).



**(8*R*,9*S*,13*S*,14*S*,17*R*)-13-methyl-17-((*E*)-2-(4,4,5,5-tetramethyl-1,3,2-dioxaborolan-2-yl)vinyl)-7,8,9,11,12,13,14,15,16,17-decahydro-6*H*-cyclopenta[*a*]phenanthrene-3,17-diol (42)**

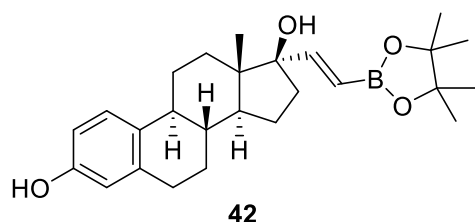

Prepared following to general procedure **A** in duplicate and combined prior to purification. **Yield:** 66% (111.4 mg, 0.26 mmol). Flash column chromatography: pentane/EtOAc: 74:26; White solid; **Mp:** 243-244 °C (pentane/EtOAc); **R<sub>f</sub>:** 0.25 (petroleum ether/EtOAc: 7:3); **<sup>1</sup>H NMR (300 MHz, CDCl<sub>3</sub>):** δ 7.58 (s, 1H), 6.97-6.91 (m, 2H), 6.59 (d, *J* = 10.5 Hz, 2H), 5.69 (d, *J* = 18.3 Hz, 1H), 2.81-2.62 (m, 2H), 2.00-1.66 (m, 6H), 1.35 (s, 12H), 1.28-1.10 (m, 8H), 0.85 (s, 3H); **<sup>13</sup>C NMR (75 MHz, CDCl<sub>3</sub>):** δ 158.9, 154.3, 138.4, 132.4, 125.9, 115.5, 112.9, 112.1, 85.1, 84.1, 49.2, 47.2, 42.2, 38.8, 37.2, 32.3, 29.7, 27.2, 25.7, 25.0, 24.7, 23.4, 14.2; **<sup>11</sup>B NMR (96 MHz, CDCl<sub>3</sub>):** δ 23.4; **IR (neat, cm<sup>-1</sup>):** ν 3372, 2974, 2924, 2866, 1626, 1382, 1348, 1137, 1004, 852; **HRMS (API<sup>+</sup>):** calcd for [M+H-H<sub>2</sub>O]<sup>+</sup> C<sub>26</sub>H<sub>36</sub>BO<sub>3</sub>: 407.2758, found: 407.2767 (+ 2.2 ppm).

**(8*R*,9*S*,13*S*,14*S*,17*R*)-3-methoxy-13-methyl-17-((*E*)-2-(4,4,5,5-tetramethyl-1,3,2-dioxaborolan-2-yl)vinyl)-7,8,9,11,12,13,14,15,16,17-decahydro-6*H*-cyclopenta[*a*]phenanthren-17-ol (43)**

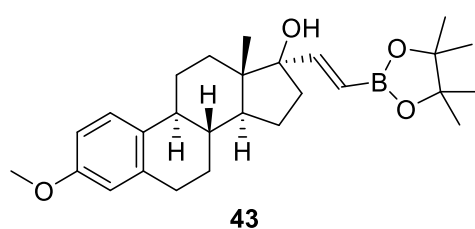

Prepared following to general procedure **A** in duplicate and combined prior to purification. **Yield:** 37% (65.2 mg, 0.15 mmol). Flash column chromatography: pentane/EtOAc: 8:2; White solid; **Mp:** 165-166 °C (pentane/EtOAc); **R<sub>f</sub>:** 0.27 (petroleum ether/EtOAc: 8:2); **<sup>1</sup>H NMR (300 MHz, CDCl<sub>3</sub>):** δ 7.18 (d, *J* = 8.6 Hz, 1H), 6.83 (d, *J* = 18.2 Hz, 1H), 6.70 (dd, *J* = 8.6, 2.6 Hz, 1H), 6.63 (d, *J* = 2.4 Hz, 1H), 5.61 (d, *J* = 18.2 Hz, 1H), 3.77 (s, 3H), 2.86-2.83 (m, 2H), 2.31-2.24 (m, 1H), 2.19-2.11 (m, 1H), 2.05-1.97 (m, 1H), 1.90-1.83 (m, 2H), 1.77-1.68 (m, 2H), 1.60-1.56 (m, 2H), 1.52-1.48 (m, 2H), 1.45-1.42 (m, 1H), 1.40-1.40 (m, 1H), 1.35-1.34 (m, 1H), 1.29 (s, 12H), 0.94 (s, 3H); **<sup>13</sup>C NMR (75 MHz, CDCl<sub>3</sub>):** δ 157.5, 157.4, 138.0, 132.7, 126.4, 115.1, 113.8, 111.5, 85.0, 83.4, 55.2, 49.2, 47.2, 43.6, 39.5, 36.4, 32.5, 29.9, 27.4, 26.3, 24.9, 24.9, 23.5, 14.3; **<sup>11</sup>B NMR (96 MHz, CDCl<sub>3</sub>):** δ 31.5; **IR (neat, cm<sup>-1</sup>):** ν 3498, 2974, 2915, 2873, 1630, 1499, 1348, 1143, 994; 970, 849, 658; **HRMS (API<sup>+</sup>):** calcd for [M+H-H<sub>2</sub>O]<sup>+</sup> C<sub>27</sub>H<sub>38</sub>BO<sub>3</sub>: 421.2914, found: 421.2912 (- 0.5 ppm).

**4,4,5,5-tetramethyl-2-((*E*)-3-(((*R*)-2,5,7,8-tetramethyl-2-((4*R*,8*R*)-4,8,12-trimethyltridecyl)chroman-6-yl)oxy)prop-1-en-1-yl)-1,3,2-dioxaborolane (44)**

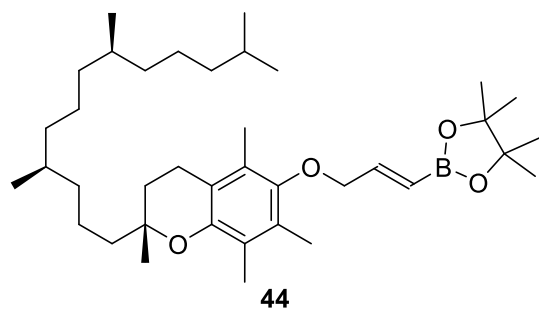

Prepared following to general procedure **A** in duplicate and combined prior to purification. **Yield:** 27% (64.7 mg, 0.11 mmol). Flash column chromatography: pentane/EtOAc: 98:2; Colourless oil; **R<sub>f</sub>:** 0.77 (petroleum ether/EtOAc: 9:1); **<sup>1</sup>H NMR (300 MHz, CDCl<sub>3</sub>):** δ 6.82 (dt, *J* = 4.4, 18.2 Hz, 1H), 5.92 (d, *J* = 18.1 Hz, 1H), 4.26-4.24 (m, 2H), 2.58-2.54 (m, 2H), 2.15 (s, 3H), 2.11 (s, 3H), 2.07 (s, 3H), 1.81-1.74 (m, 3H), 1.60 (s, 3H), 1.54-1.46 (m, 5H), 1.42-1.36 (m, 5H), 1.29 (s, 12H), 1.16-1.04 (m, 10H), 0.88-0.83 (m, 12H); **<sup>13</sup>C NMR (75 MHz, CDCl<sub>3</sub>):** δ 148.7, 148.3, 148.0, 128.0, 126.0, 123.0, 117.6, 83.4, 74.9, 74.3, 40.2; 39.5, 37.6, 37.6, 37.4, 32.9, 32.8, 31.4, 28.1, 25.2, 24.9, 24.6, 24.0, 22.9, 22.8, 21.2, 20.8, 19.9, 19.8, 12.9, 12.0, 11.9. The carbon bearing boron was not observed. **<sup>11</sup>B NMR**

**(96 MHz, CDCl<sub>3</sub>):**  $\delta$  31.6; **IR (neat, cm<sup>-1</sup>):**  $\nu$  2926, 2868, 1645, 1458, 1367, 1346, 1321, 1257, 1144, 1091, 736; **HRMS (ESI<sup>+</sup>):** calcd for [M+H]<sup>+</sup> C<sub>38</sub>H<sub>66</sub>BO<sub>4</sub>: 597.5054, found: 597.5073 (+ 3.2 ppm).

## Scale Up

In a 10 mL IKA<sup>®</sup> vial were added the 4-ethynylanisole (52  $\mu$ L, 0.4 mmol, 1 equiv.), B<sub>2</sub>Pin<sub>2</sub> (204 mg, 0.8 mmol, 2 equiv.) and NBu<sub>4</sub>BF<sub>4</sub> (132 mg, 0.4 mmol, 1 equiv.) in anhydrous MeOH (8 mL). The reaction mixture was stirred under air before starting the IKA ElectraSyn<sup>®</sup> device ((+)SST, (-)SST, 5 mA/cm<sup>2</sup>, 2 F/mol, 128 min). Then, HCl 1 M (4 mL) was added and the aqueous layer was extracted with EtOAc (3 x 15 mL). The combined organic layers were washed with a NH<sub>4</sub>Cl saturated aqueous solution, dried over MgSO<sub>4</sub>, filtered and concentrated under reduced pressure. Then, the residue was purified by flash chromatography (pentane/EtOAc: 98:2) to obtain a pale-yellow oil with 71% yield (73.5 mg, 0.28 mmol).

In a 20 mL IKA<sup>®</sup> vial were added the 4-ethynylanisole (104  $\mu$ L, 0.8 mmol, 1 equiv.), B<sub>2</sub>Pin<sub>2</sub> (406 mg, 1.6 mmol, 2 equiv.) and NBu<sub>4</sub>BF<sub>4</sub> (263 mg, 0.8 mmol, 1 equiv.) in anhydrous MeOH (16 mL). The reaction mixture was stirred under air before starting the IKA ElectraSyn<sup>®</sup> device ((+)SST, (-)SST, 5 mA/cm<sup>2</sup>, 2 F/mol, 256 min). Then, HCl 1 M (8 mL) was added and the aqueous layer was extracted with EtOAc (3 x 20 mL). The combined organic layers were washed with a NH<sub>4</sub>Cl saturated aqueous solution, dried over MgSO<sub>4</sub>, filtered and concentrated under reduced pressure. Then, the residue was purified by flash chromatography (pentane/EtOAc: 98:2) to obtain a pale-yellow oil with 51% yield (106.6 mg, 0.41 mmol).

## Mechanistic studies

### Cyclic voltammetry Measurements

CV measurements were done under Argon (Ar) with Gold (Au) as the working electrode, Platinum (Pt) as the counter electrode and Saturated calomel electrode ( $\text{Hg}_2\text{Cl}_2$ ) as the reference at  $200 \text{ mV}\cdot\text{s}^{-1}$  in a  $0.1 \text{ M}$  solution of  $\text{NBu}_4\text{BF}_4$  in anhydrous MeOH (13 mL).

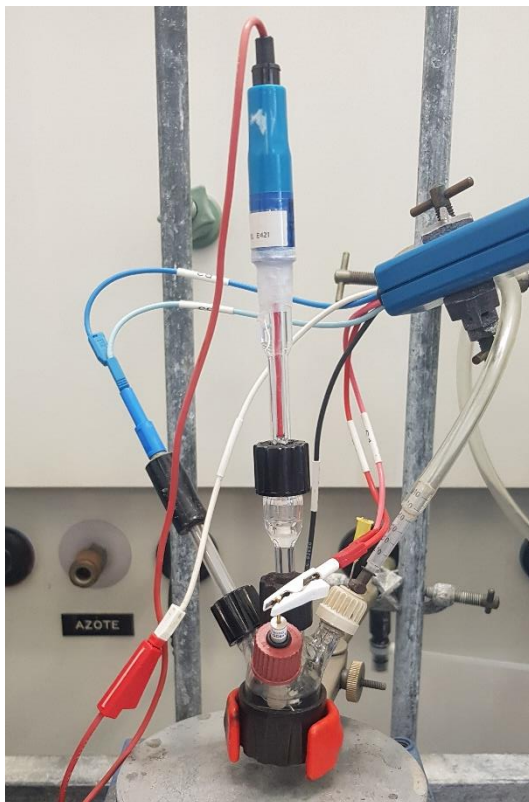

Picture 1: Home-made cell for cyclic voltammetry

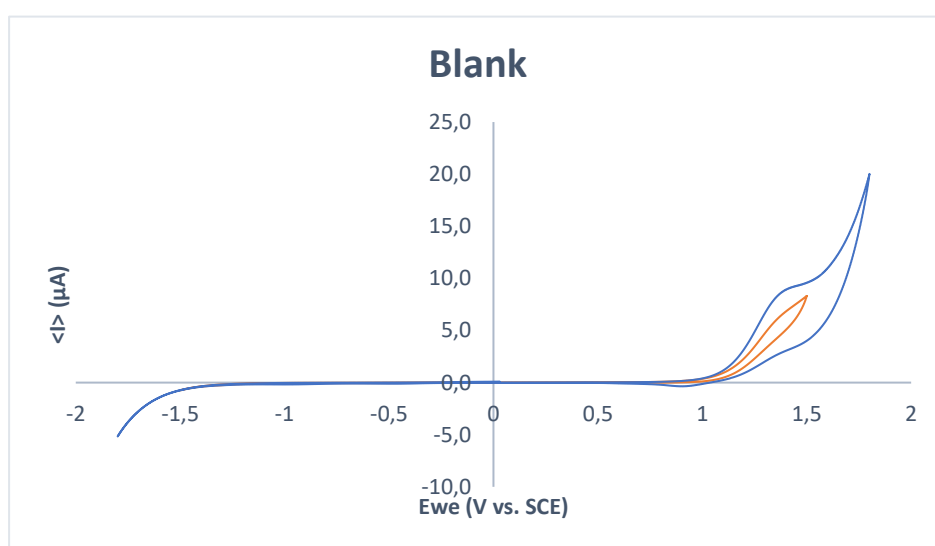

Figure 1: Blank - Anhydrous MeOH,  $\text{NBu}_4\text{BF}_4$  0.1M  
1.8 V to -1.8 V in oxidation (blue), 1.5 V to -1.5 V in oxidation (orange)

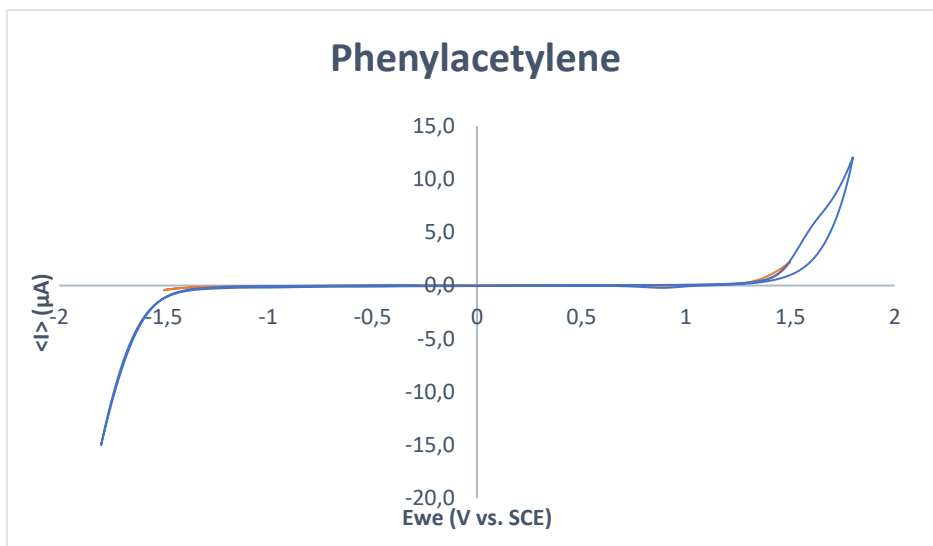

Figure 2: Phenylacetylene  $2.3 \cdot 10^{-2} M$   
 1.8 V to -1.8 V in oxidation (blue), 1.5 V to -1.5 V in oxidation (orange)

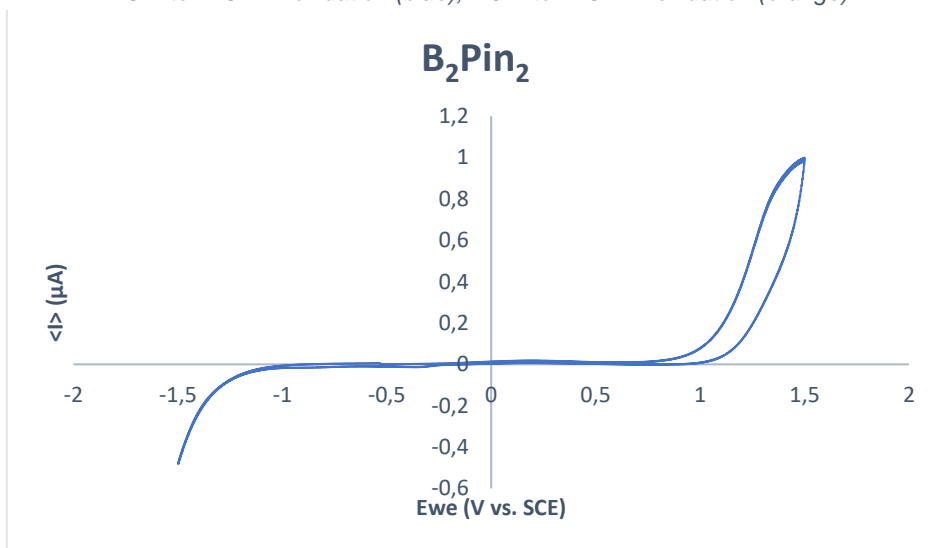

Figure 3:  $B_2Pin_2$   $2.3 \cdot 10^{-2} M$   
 1.5 V to -1.5 V in oxidation

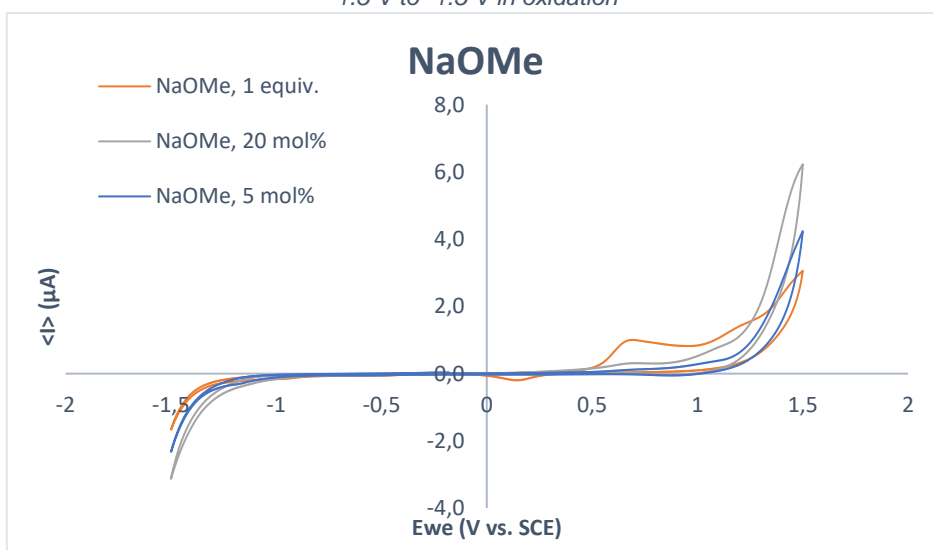

Figure 4: NaOMe,  $2.3 \cdot 10^{-2} M$  (Red),  $4.7 \cdot 10^{-3} M$  (Green),  $1.5 \cdot 10^{-3} M$  (Blue)  
 1.5 V to -1.5 V in oxidation  
 oxidation wave: 0.6V

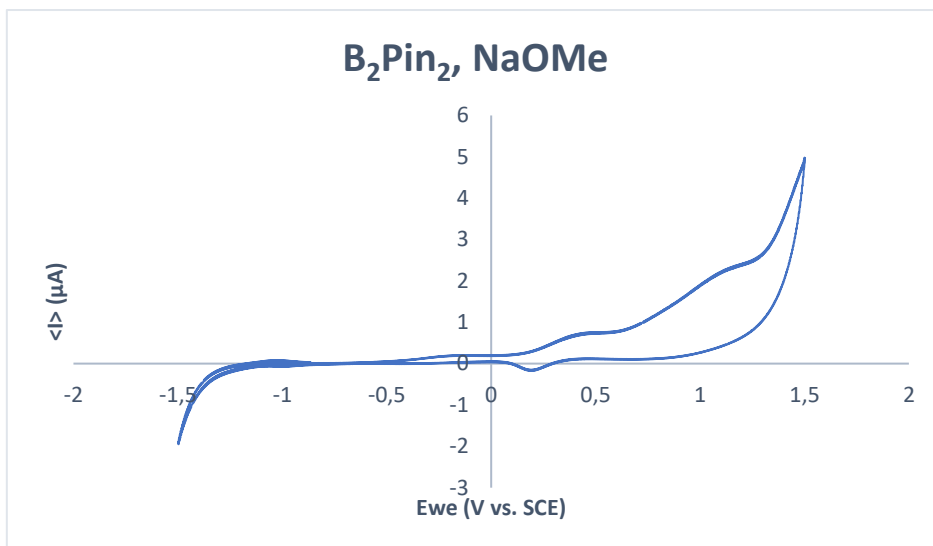

Figure 5:  $B_2Pin_2$   $2.3 \cdot 10^{-2}$  M, NaOMe,  $2.3 \cdot 10^{-2}$  M  
 1.5 V to -1.5 V in oxidation  
 oxidation wave: 1.2V

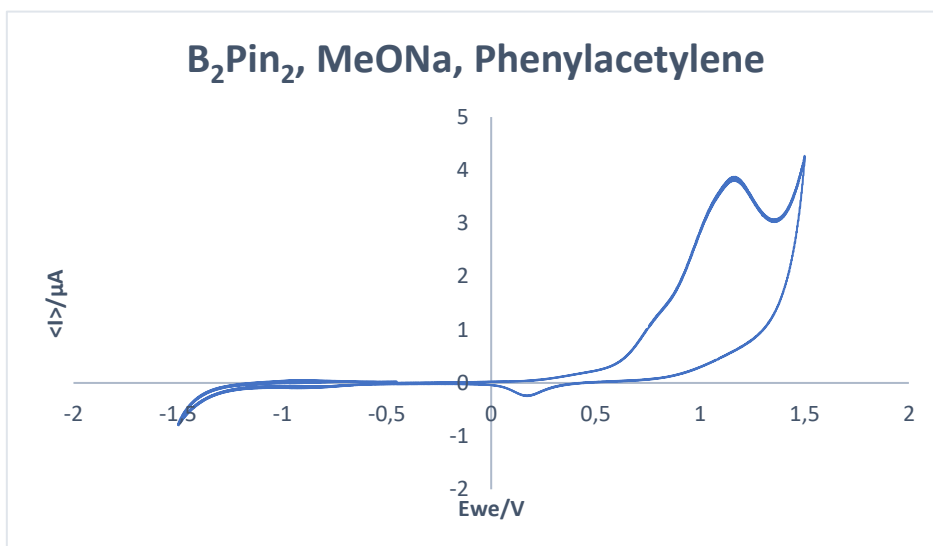

Figure 6:  $B_2Pin_2$   $2.3 \cdot 10^{-2}$  M, NaOMe  $2.3 \cdot 10^{-2}$  M, phenylacetylene  $2.3 \cdot 10^{-2}$  M  
 1.5 V to -1.5 V in oxidation  
 oxidation wave: 1.2V

For the CV measurements of the phenylacetylene and the  $B_2Pin_2$ , no oxidation or reduction wave was observed.

## Control Experiments

Following the procedure **A** except the current, these reactions below were started to confirm the requirement of the current.

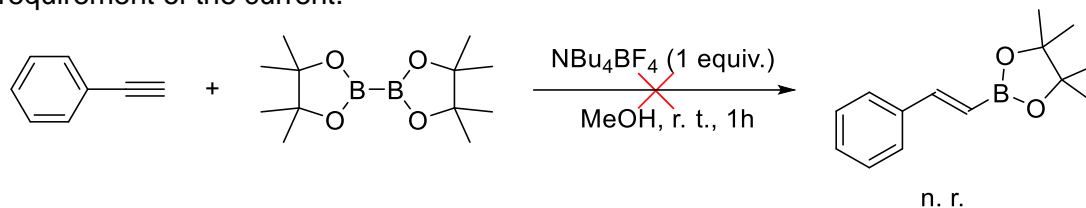

In a 5 mL IKA<sup>®</sup> vial were added the alkyne derivative (0.2 mmol, 1 equiv.), B<sub>2</sub>Pin<sub>2</sub> (102 mg, 0.4 mmol, 2 equiv.), NaOMe (11 mg, 0.2 mmol, 1 equiv.) and NBu<sub>4</sub>BF<sub>4</sub> (66 mg, 0.2 mmol, 1 equiv.) in anhydrous MeOH (4 mL). The reaction mixture was stirred under air for 24 h. Then, HCl 1 M (2 mL) was added and the aqueous layer was extracted with EtOAc (3 x 10 mL). The combined organic layers were washed with a NH<sub>4</sub>Cl saturated aqueous solution, dried over MgSO<sub>4</sub>, filtered and concentrated under reduced pressure.

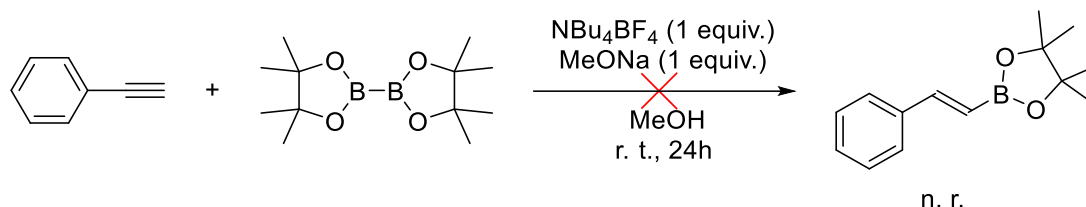

Following the procedure **A** except the charge, these reactions below were started to confirm the requirement of electrochemistry and to know if metals of Stainless Steel play a role in the reaction.

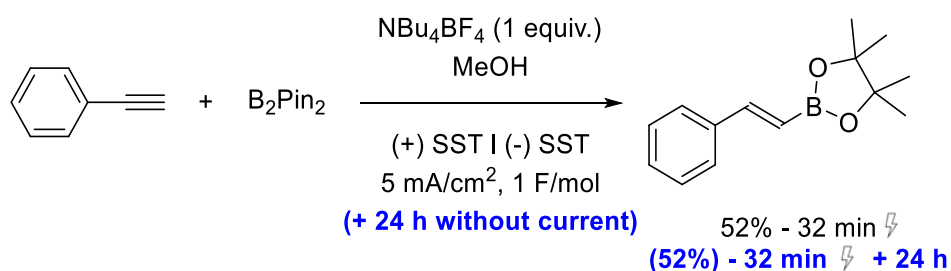

No change of <sup>1</sup>H-NMR yield was observed after leaving the same reaction for 24 h under stirring with the electrodes and without current.

## Deuteration experiments

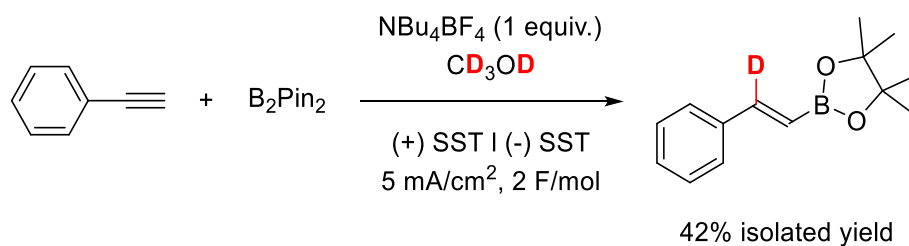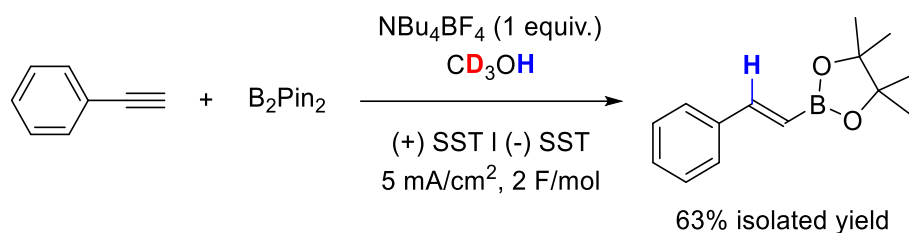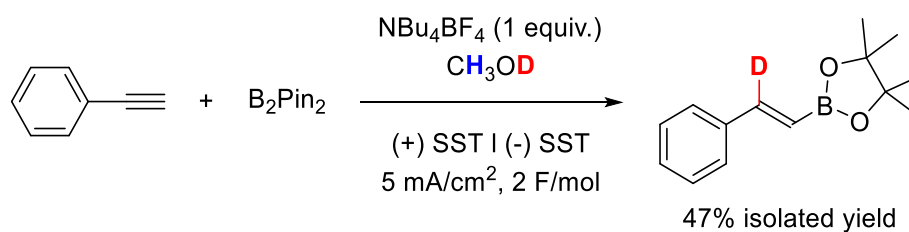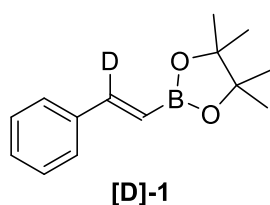

Prepared following to the procedure **A** with methanol-d<sub>4</sub>. **Yield:** 42% (19.4 mg, 0.08 mmol). Flash chromatography: pentane/EtOAc: 98:2; Pale yellow oil; **R<sub>f</sub>**: 0.66 (petroleum ether/EtOAc: 9:1); **<sup>1</sup>H NMR (300 MHz, CDCl<sub>3</sub>):** δ 7.51-7.48 (m, 2H), 7.34-7.31 (m, 3H), 6.17 (s, 1H), 1.32 (s, 12H).

To conclude, the formation of the product **[D]-1** shows that the H atom comes from the bond O-H from the methanol. Moreover, as a significant decrease of the reaction yield was observed, a KIE measurement was driven.

## Kinetic Isotope Effect (KIE)

Two different methods of the KIE measurement were done to compare the effect of the overpotential of D on the cathode.

### 1<sup>st</sup> method:

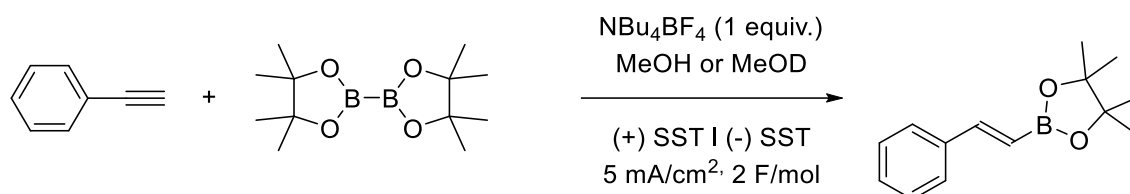

In a 5 mL IKA<sup>®</sup> vial were added phenylacetylene (22  $\mu$ L, 0.2 mmol, 1 equiv.),  $B_2Pin_2$  (102 mg, 0.4 mmol, 2 equiv.) and  $NBu_4BF_4$  (66 mg, 0.2 mmol, 1 equiv.) in anhydrous MeOH or MeOD (4 mL). The reaction mixture was stirred under air before starting the IKA ElectraSyn<sup>®</sup> device ((+)SST, (-)SST,  $5\text{ mA/cm}^2$ ,  $2\text{ F/mol}$ ). Then, HCl 1 M (2 mL) was added and the aqueous layer was extracted with EtOAc (3 x 10 mL). The combined organic layers were washed with a  $NH_4Cl$  saturated aqueous solution, dried over  $MgSO_4$ , filtered and concentrated under reduced pressure.

MeOH: 5 reactions were set up and stopped at 5 min, 10 min, 15 min, 30 min and 40 min, respectively.

The reaction yields were determined by  $^1H$  NMR using *N,N*-dimethylformamide as an internal standard.

MeOD: 4 reactions were set up and stopped at 15 min, 20 min, 30 min and 40 min, respectively. The reaction yields were determined by  $^1H$  NMR using *N,N*-dimethylformamide as an internal standard.

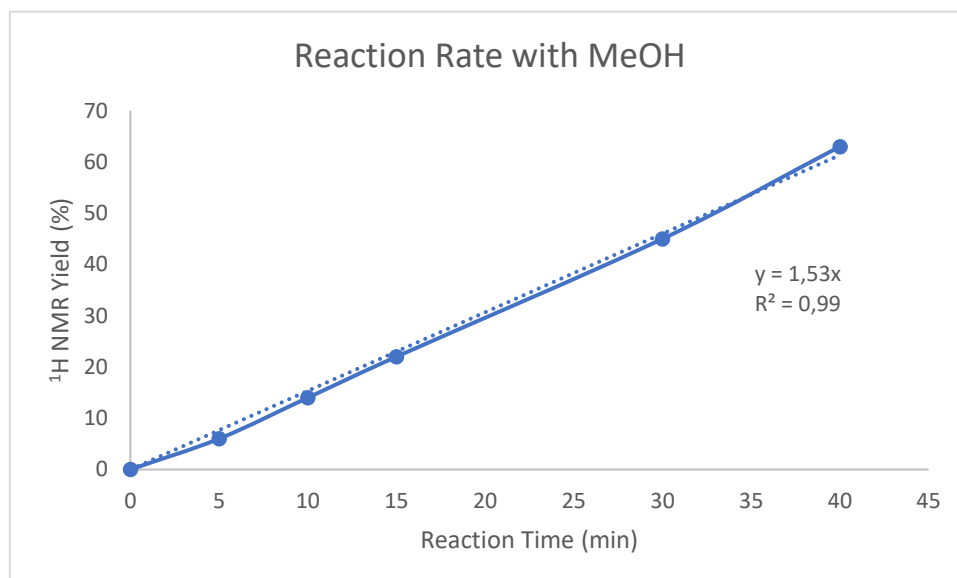

The coefficient of the linear trend curve corresponds to the reaction rate  $k_H = 1.53$



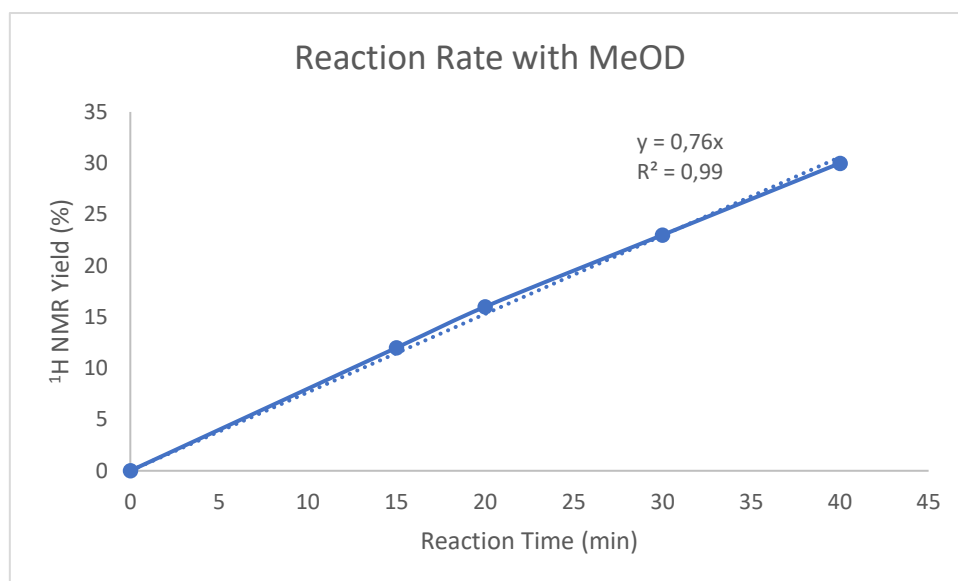

The coefficient of the linear trend curve corresponds to the reaction rate  $k_D = 0.76$

With the 1<sup>st</sup> method, the  $KIE = k_H/k_D = 2.01$ .

2<sup>nd</sup> method:

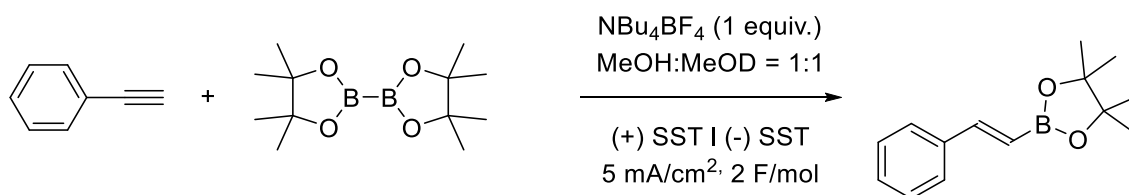

In a 5 mL IKA<sup>®</sup> vial were added phenylacetylene (22  $\mu\text{L}$ , 0.2 mmol, 1 equiv.),  $\text{B}_2\text{Pin}_2$  (102 mg, 0.4 mmol, 2 equiv.) and  $\text{NBu}_4\text{BF}_4$  (66 mg, 0.2 mmol, 1 equiv.) in anhydrous mixture of  $\text{MeOH}:\text{MeOD} = 1:1$  (4 mL). The reaction mixture was stirred under air before starting the IKA ElectraSyn<sup>®</sup> device ((+)SST, (-)SST, 5  $\text{mA}/\text{cm}^2$ , 2 F/mol). Then,  $\text{HCl}$  1 M (2 mL) was added and the aqueous layer was extracted with  $\text{EtOAc}$  (3 x 10 mL). The combined organic layers were washed with a  $\text{NH}_4\text{Cl}$  saturated aqueous solution, dried over  $\text{MgSO}_4$ , filtered and concentrated under reduced pressure.

5 reactions were set up and stopped at 20 min, 30 min, 40 min, 50 min and 64 min respectively. The reaction yields were determined by  $^1\text{H}$  NMR using  $N,N$ -dimethylformamide as an internal standard.

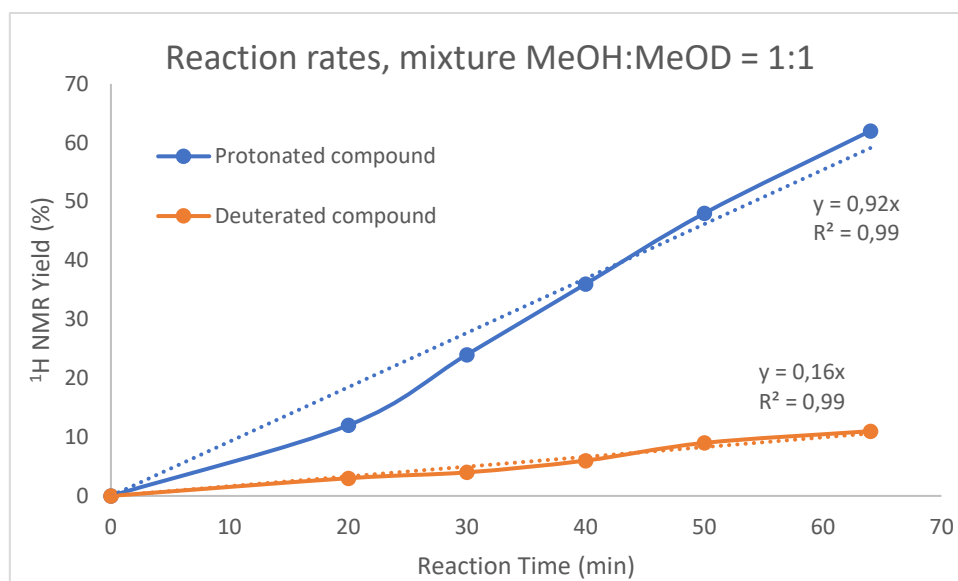

With the 2<sup>nd</sup> method, the **KIE =  $k_H/k_D = 5.75$** .

### Sensitivity assessment

Following the procedure **A**, NMR Yields were determined by <sup>1</sup>H NMR using *N,N*-dimethylformamide and triphenylmethane as an internal standards.

Sensitivity assessment was performed in analogy with the literature<sup>16</sup> and adapted for electrochemistry.

| #  | EXPERIMENT            | n (mmol)          | V (mL) | C (Mol/L) | SET UP                   |
|----|-----------------------|-------------------|--------|-----------|--------------------------|
| 1  | Low C                 | 0.18 <sup>1</sup> | 4      | 0.045     |                          |
| 2  | High C                | 0.22 <sup>1</sup> | 4      | 0.055     |                          |
| 3  | High H <sub>2</sub> O | 0.2               | 4      | 0.05      | + 40 μL H <sub>2</sub> O |
| 4  | Low T                 | 0.4               | 8      | 0.05      | 10°C                     |
| 5  | High T                | 0.4               | 8      | 0.05      | 32°C                     |
| 6  | Low S                 | 0.15              | 3      | 0.05      | S = 1.28 cm <sup>2</sup> |
| 7  | High S                | 0.25              | 5      | 0.05      | S = 3.32 cm <sup>2</sup> |
| 8  | Control 1             | 0.2               | 4      | 0.05      |                          |
| 9  | Control 2             | 0.4               | 8      | 0.05      |                          |
| 10 | Big Scale             | 0.8               | 16     | 0.05      |                          |

<sup>1</sup>Volume cannot be changed with IKA Eletrasyn device otherwise the contact surface of the electrode changes.

| #  | EXPERIMENT            | <sup>1</sup> H NMR YIELD (%) | DEVIATION VALUES (%) |
|----|-----------------------|------------------------------|----------------------|
| 1  | Low C                 | 77                           | -3.8                 |
| 2  | High C                | 66                           | -17.5                |
| 3  | High H <sub>2</sub> O | 19                           | -76.3                |
| 4  | Low T <sup>‡</sup>    | 33                           | -52.9                |
| 5  | High T <sup>‡</sup>   | 70                           | 0                    |
| 6  | Low S                 | 80                           | 0                    |
| 7  | High S                | 80                           | 0                    |
| 8  | Control1              | 80                           | -                    |
| 9  | Control2 <sup>‡</sup> | 70                           | -                    |
| 10 | Big Scale             | 59                           | -26.3                |

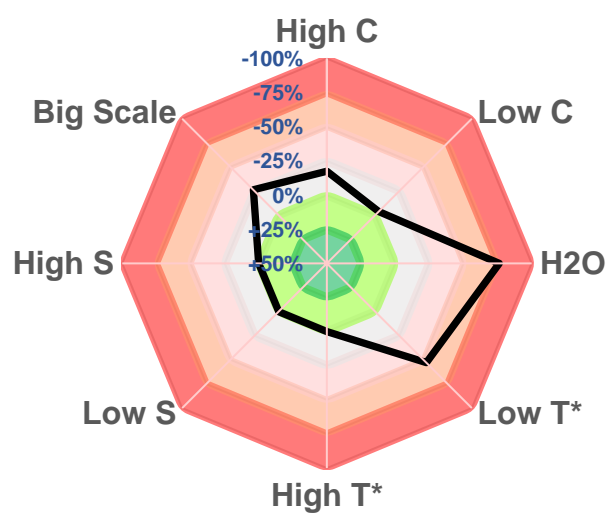

For the control of the temperature, a home-made cell was designed, see below (Picture 2).

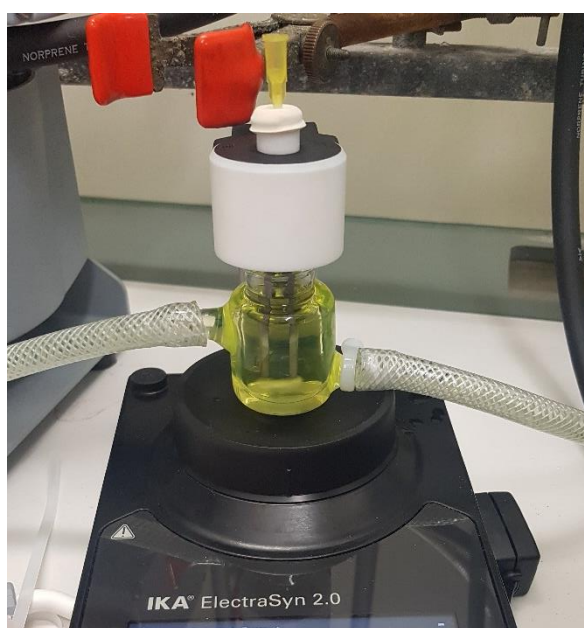

Picture 2: Home-made cell to control the temperature.

To conclude, the reaction is sensible to water and low temperature.

# NMR-Spectra of Key Compounds

## (E)-4,4,5,5-tetramethyl-2-styryl-1,3,2-dioxaborolane (1)

$^1\text{H}$  NMR (300 MHz,  $\text{CDCl}_3$ )

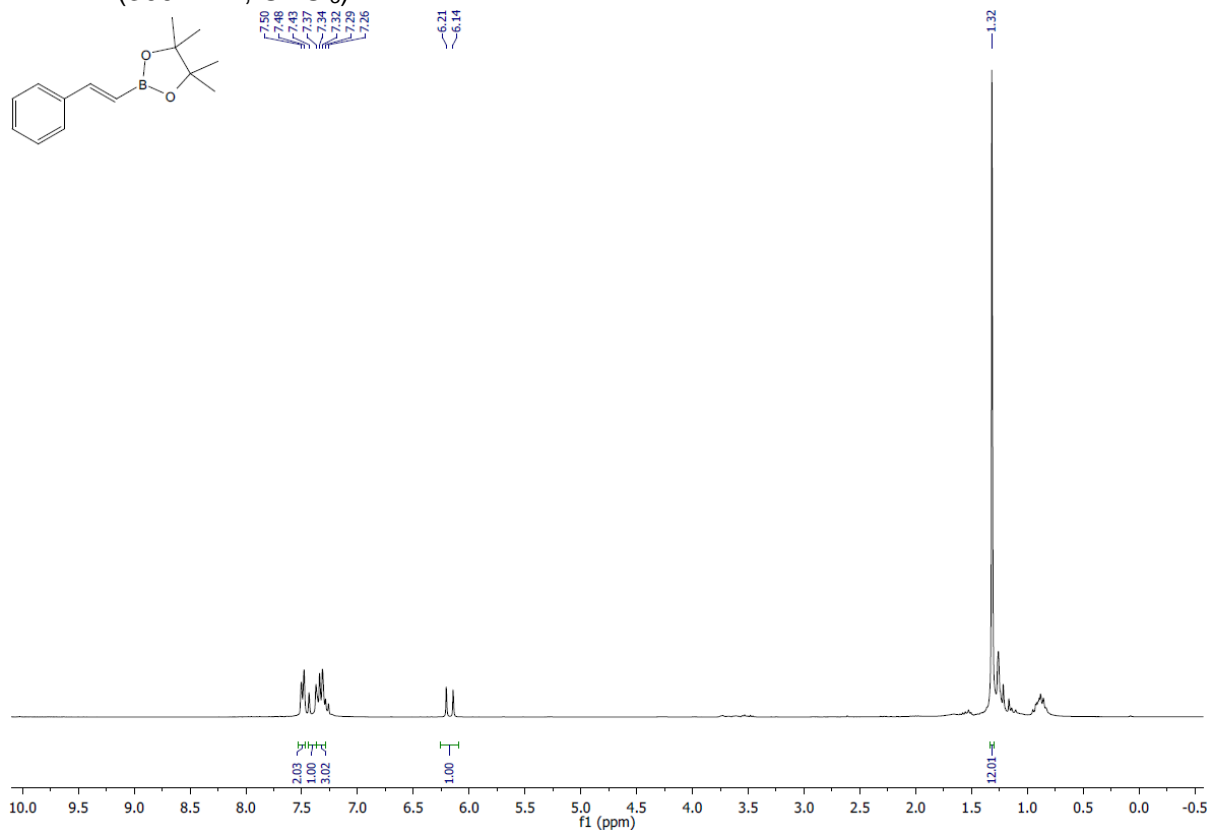

$^{13}\text{C}$  NMR (75 MHz,  $\text{CDCl}_3$ )

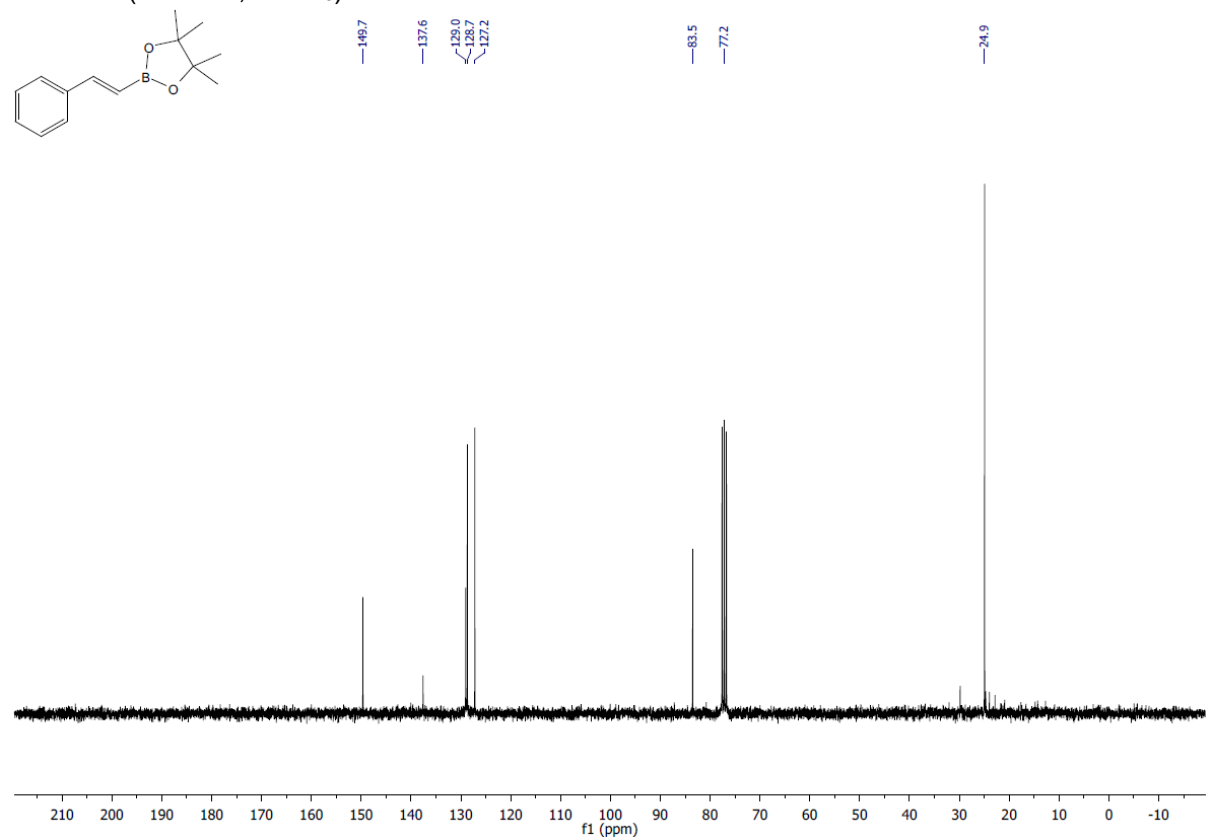

**(E)-4,4,5,5-tetramethyl-2-(4-methylstyryl)-1,3,2-dioxaborolane (2)**

<sup>1</sup>H NMR (300 MHz, CDCl<sub>3</sub>)

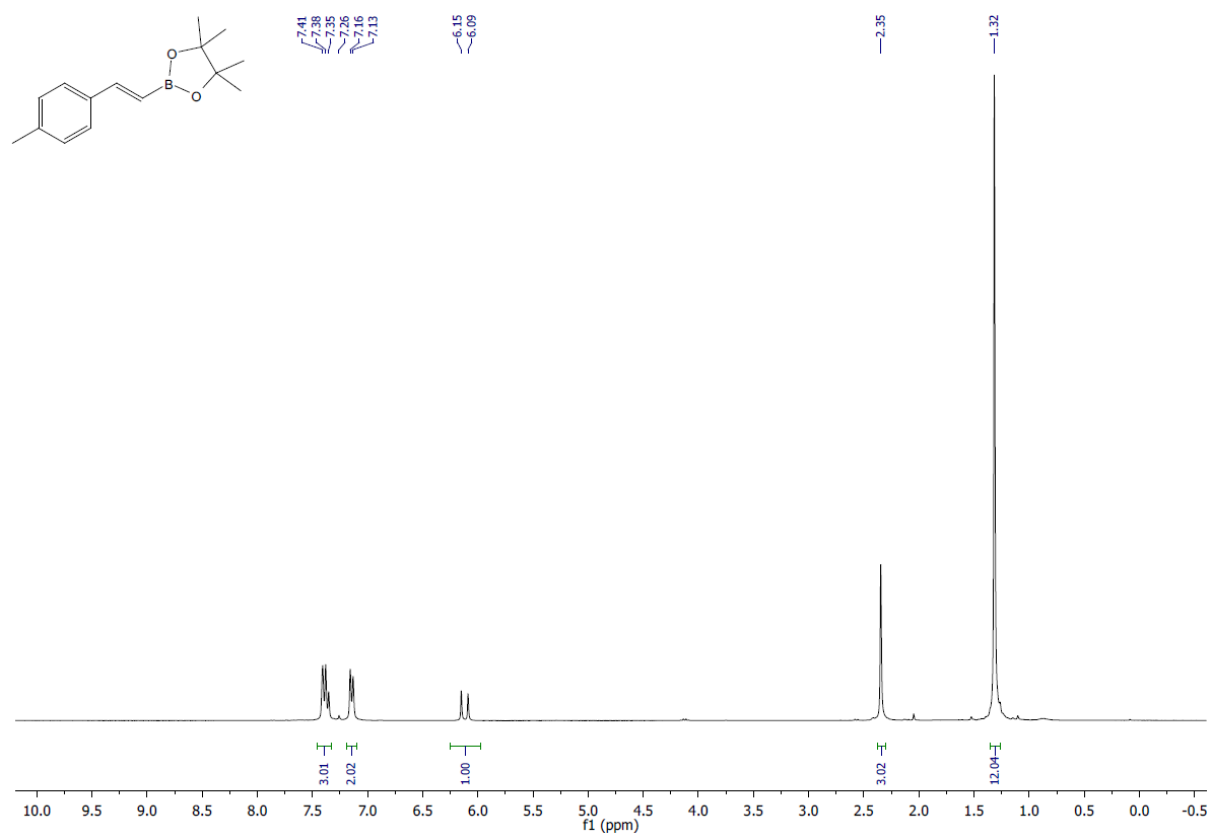

<sup>13</sup>C NMR (75 MHz, CDCl<sub>3</sub>)

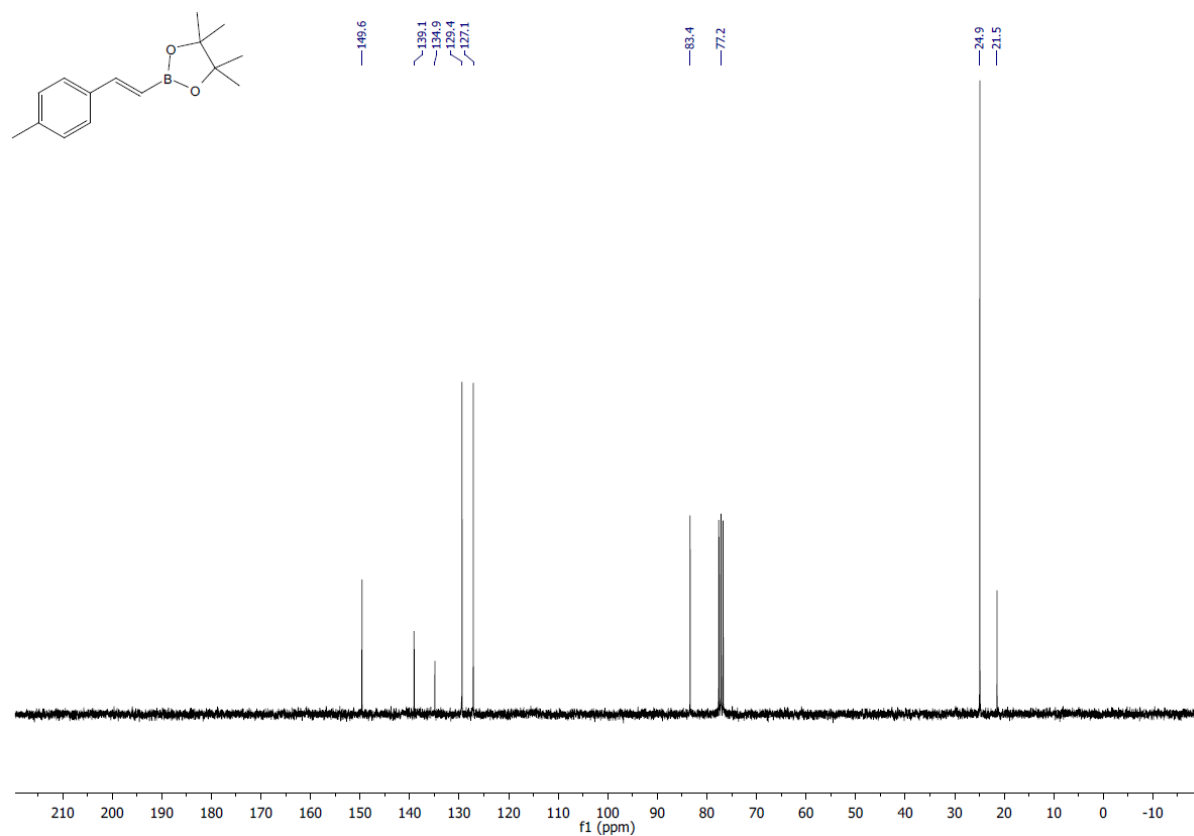

**(E)-4,4,5,5-tetramethyl-2-(3-methylstyryl)-1,3,2-dioxaborolane (3)**

<sup>1</sup>H NMR (300 MHz, CDCl<sub>3</sub>)

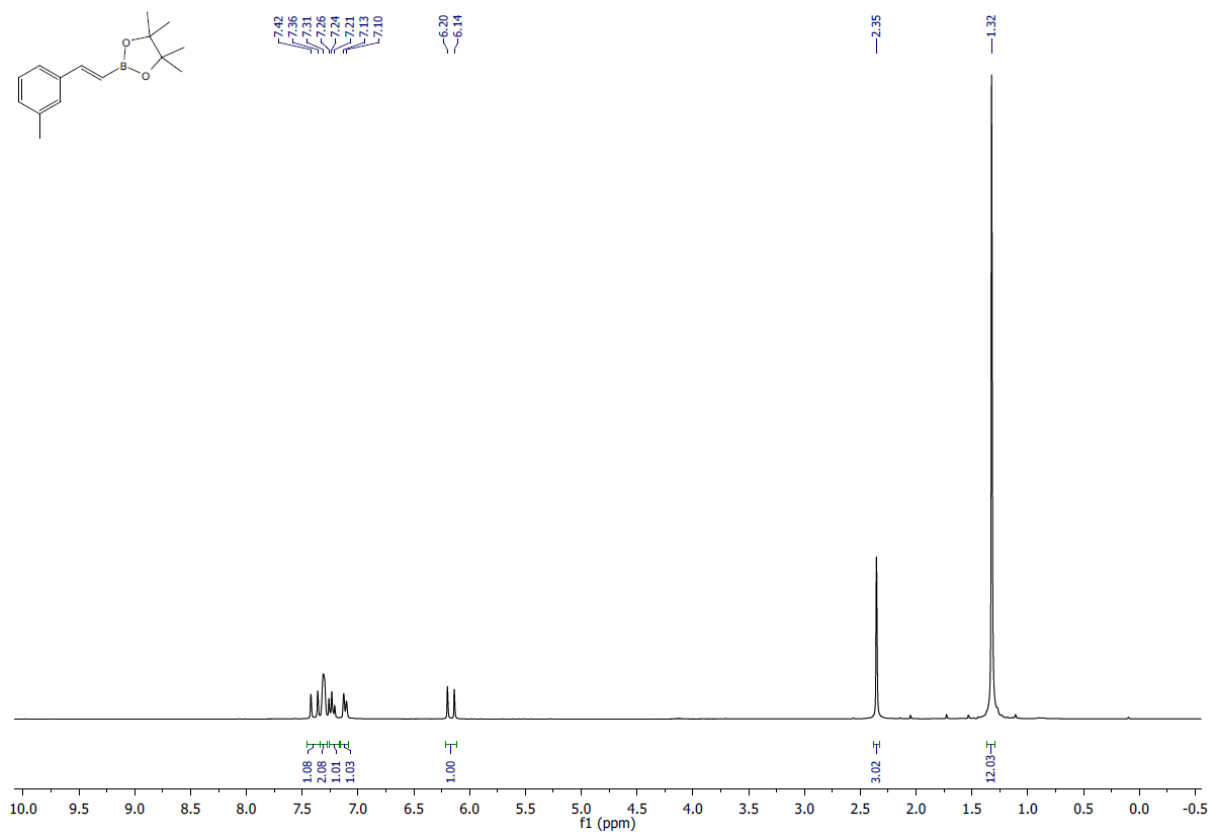

<sup>13</sup>C NMR (75 MHz, CDCl<sub>3</sub>)

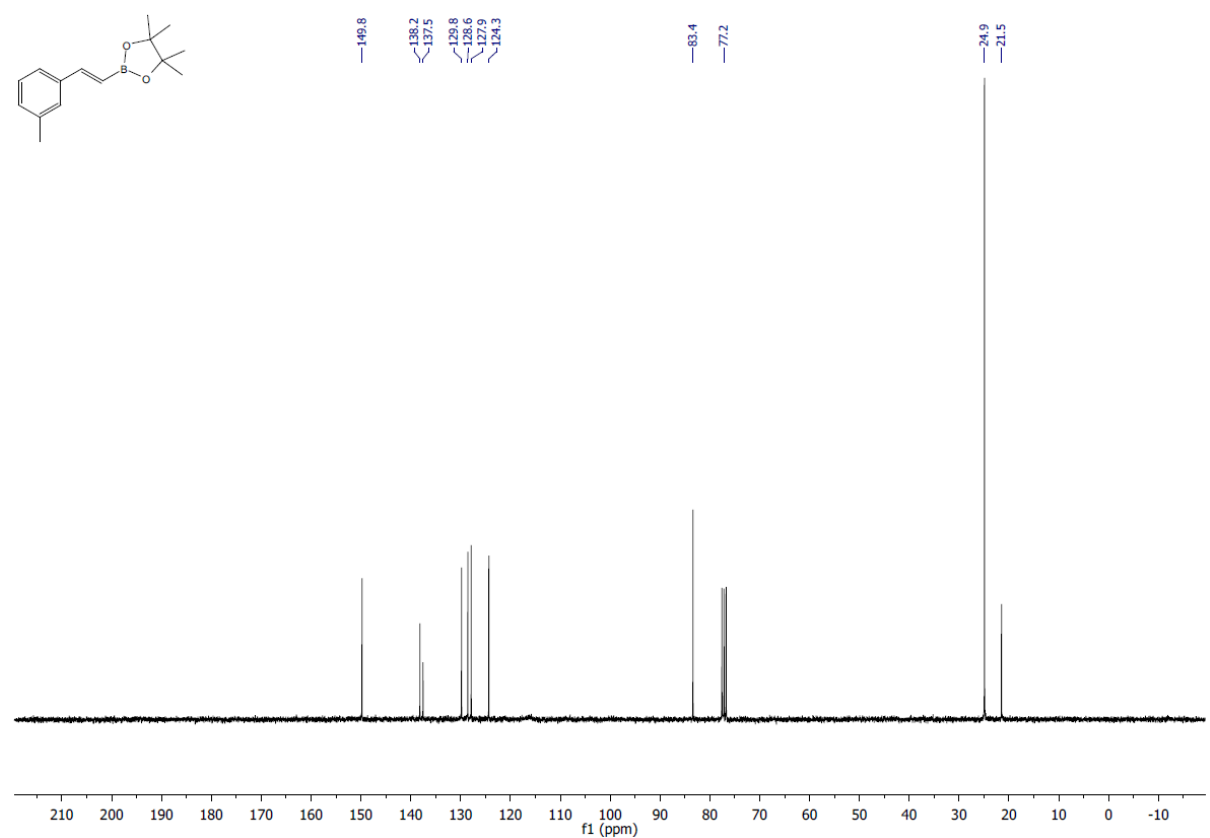

**(E)-4,4,5,5-tetramethyl-2-(2-methylstyryl)-1,3,2-dioxaborolane (4)**

$^1\text{H NMR}$  (300 MHz,  $\text{CDCl}_3$ )

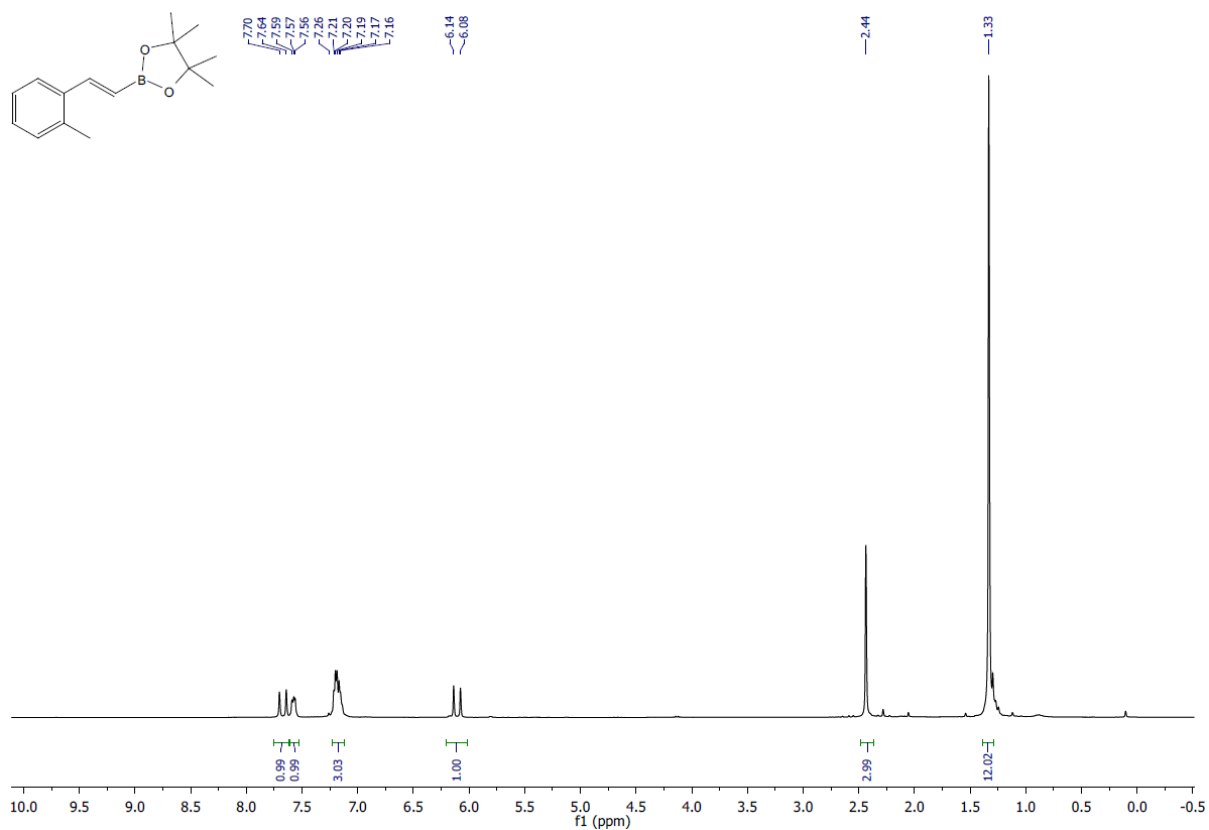

$^{13}\text{C NMR}$  (75 MHz,  $\text{CDCl}_3$ )

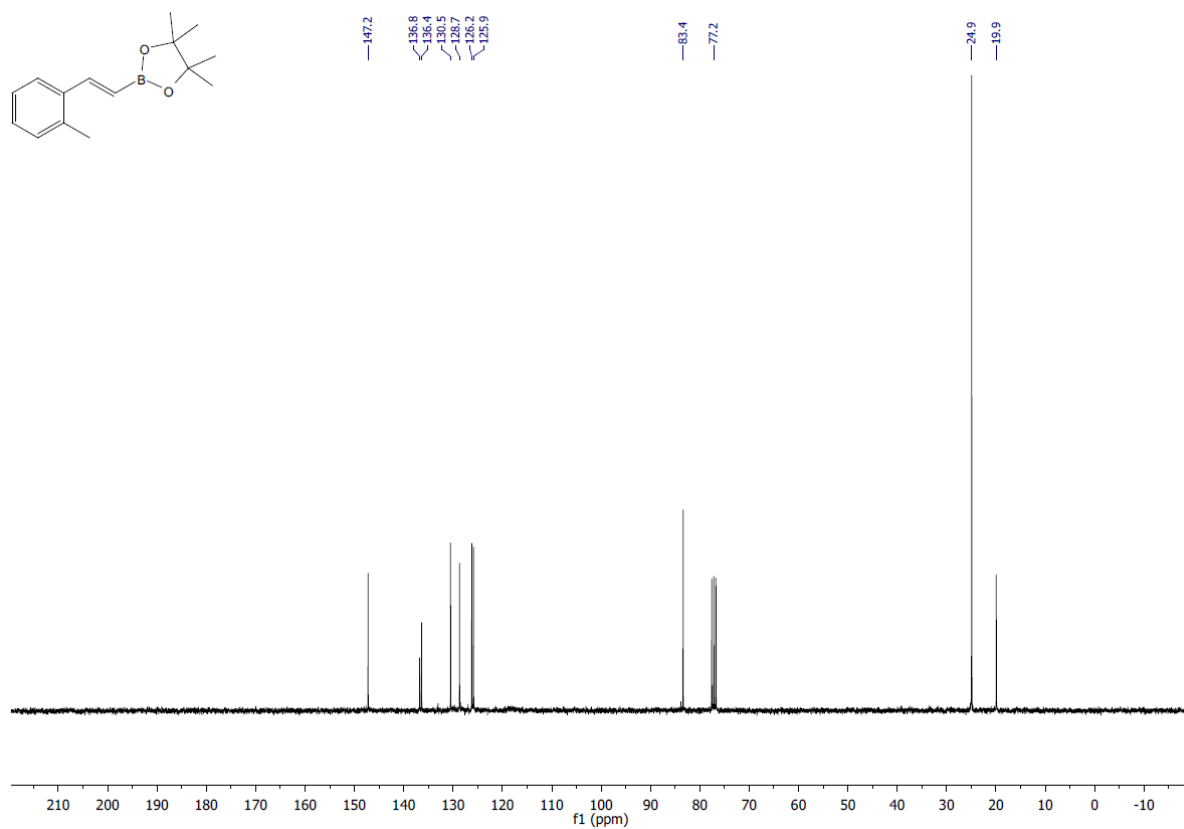

**(E)-2-(4-(tert-butyl)styryl)-4,4,5,5-tetramethyl-1,3,2-dioxaborolane (5)**

<sup>1</sup>H NMR (300 MHz, CDCl<sub>3</sub>)

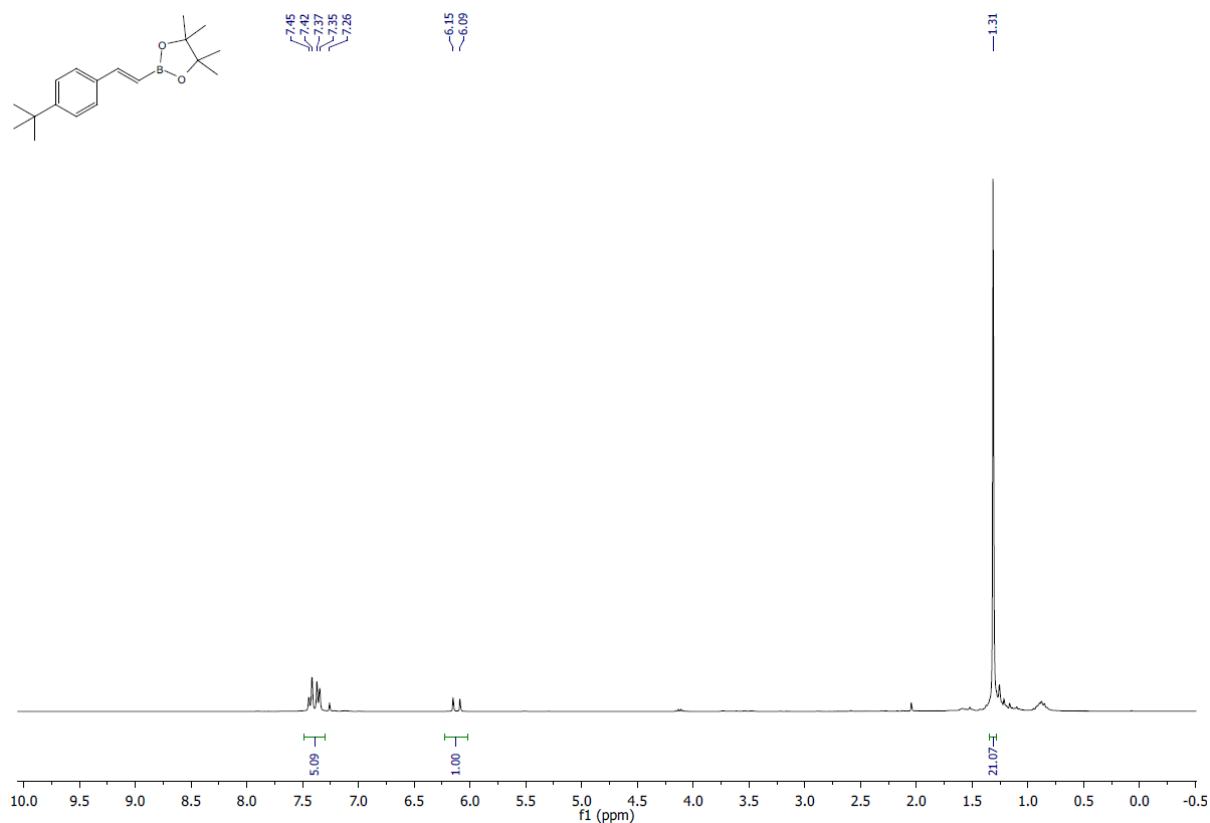

<sup>13</sup>C NMR (75 MHz, CDCl<sub>3</sub>)

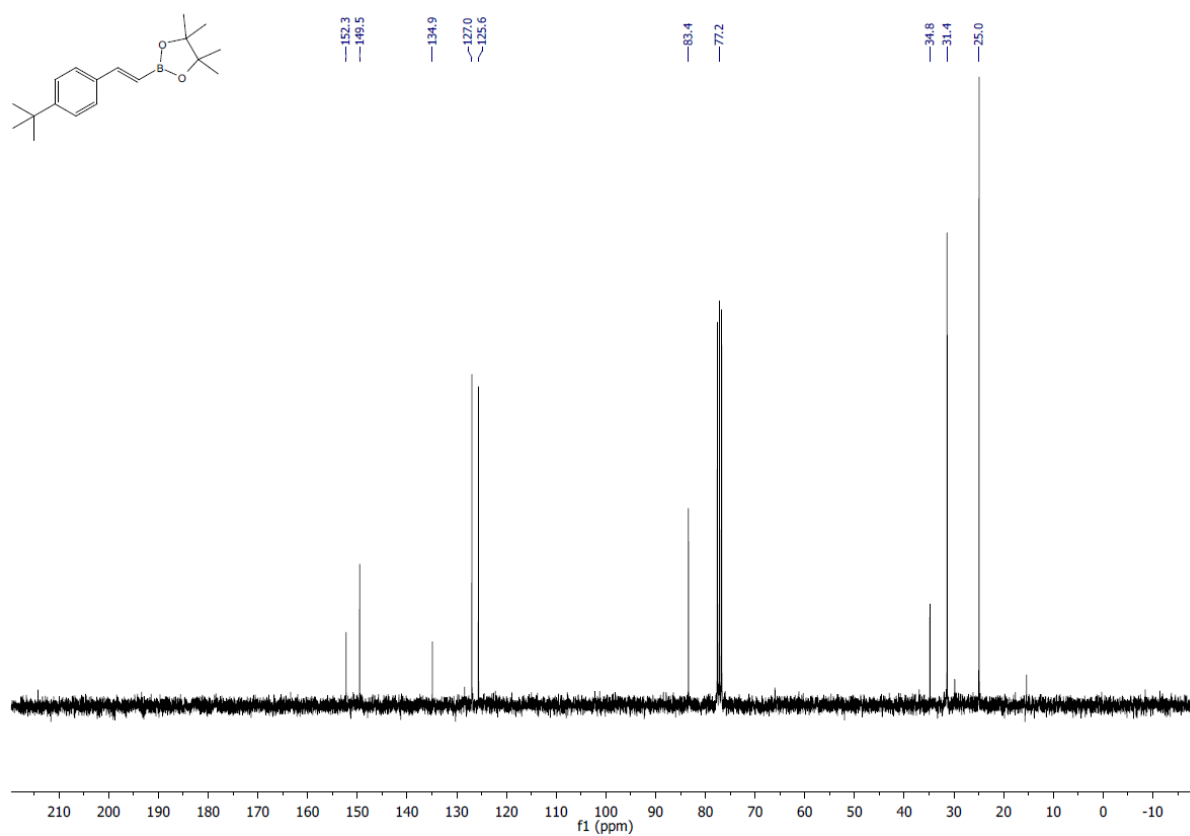



**(E)-2-(4-methoxystyryl)-4,4,5,5-tetramethyl-1,3,2-dioxaborolane (6)**

<sup>1</sup>H NMR (300 MHz, CDCl<sub>3</sub>)

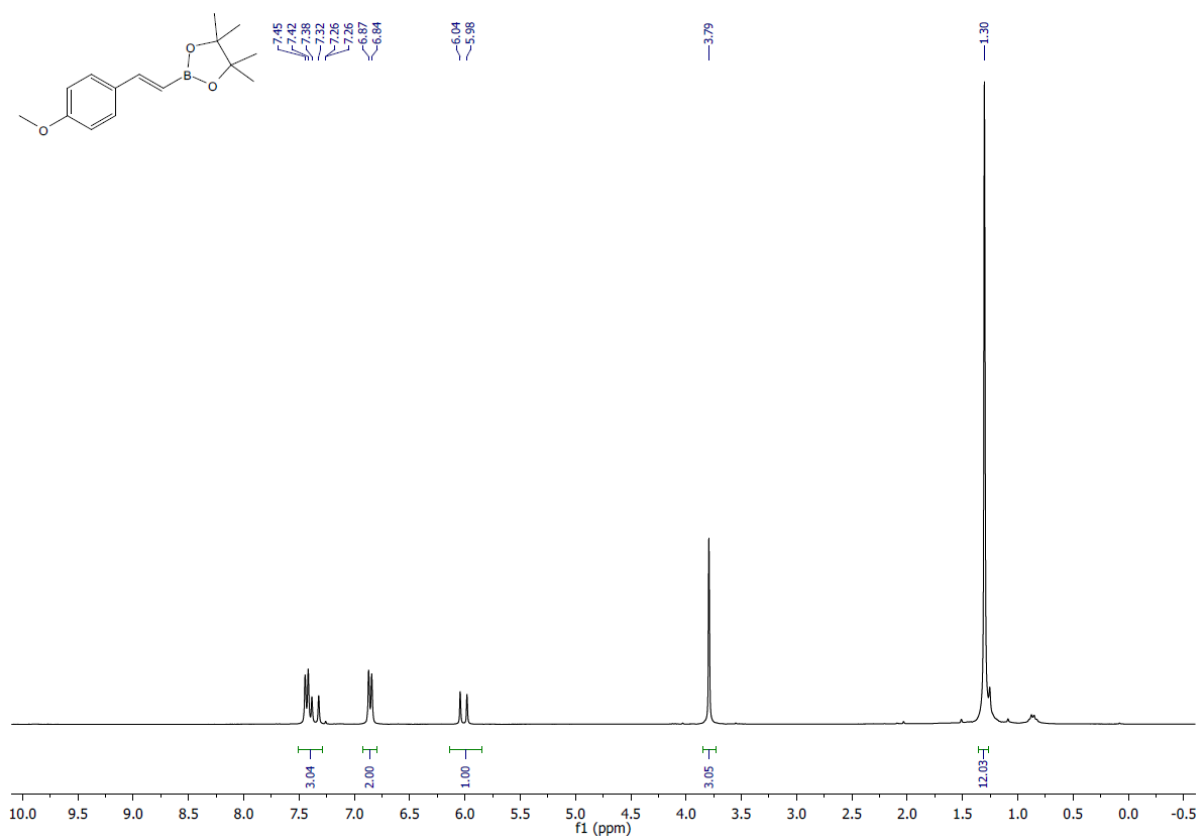

<sup>13</sup>C NMR (75 MHz, CDCl<sub>3</sub>)

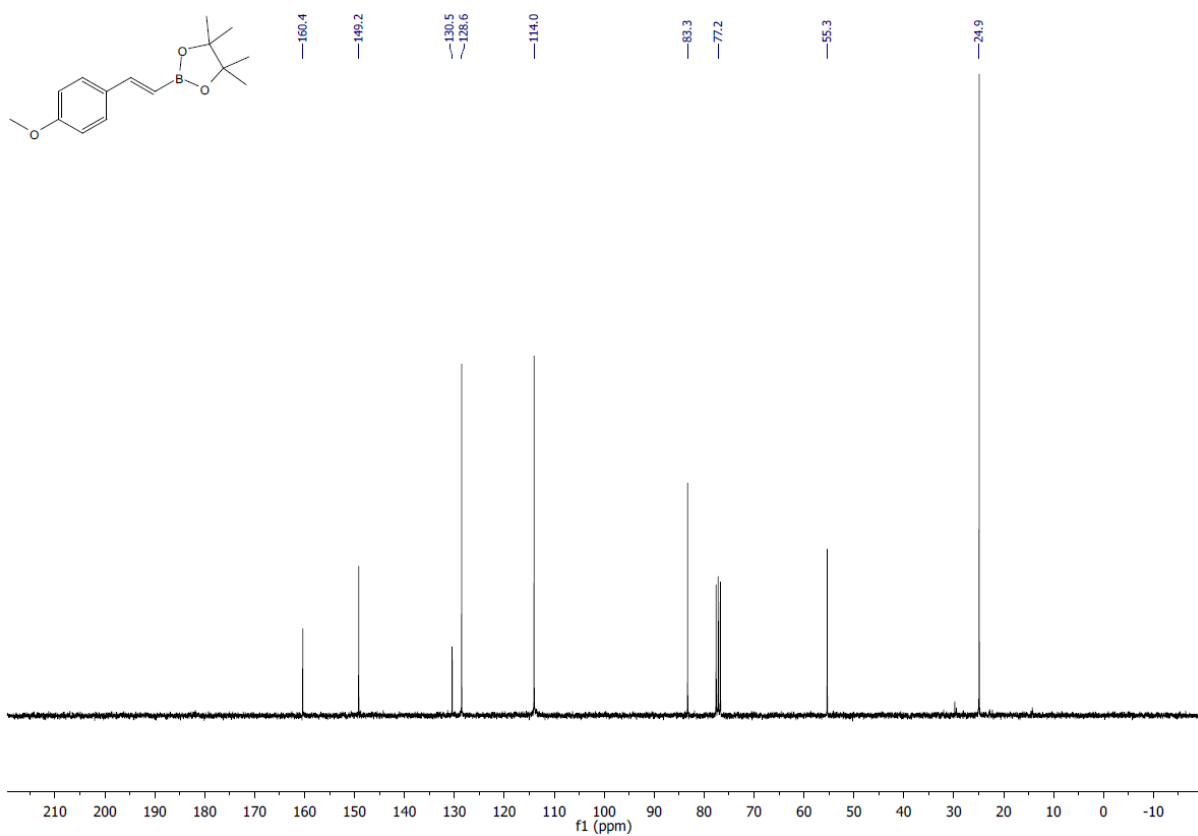

# (E)-2-(2-methoxystyryl)-4,4,5,5-tetramethyl-1,3,2-dioxaborolane (7)

$^1\text{H NMR}$  (300 MHz,  $\text{CDCl}_3$ )

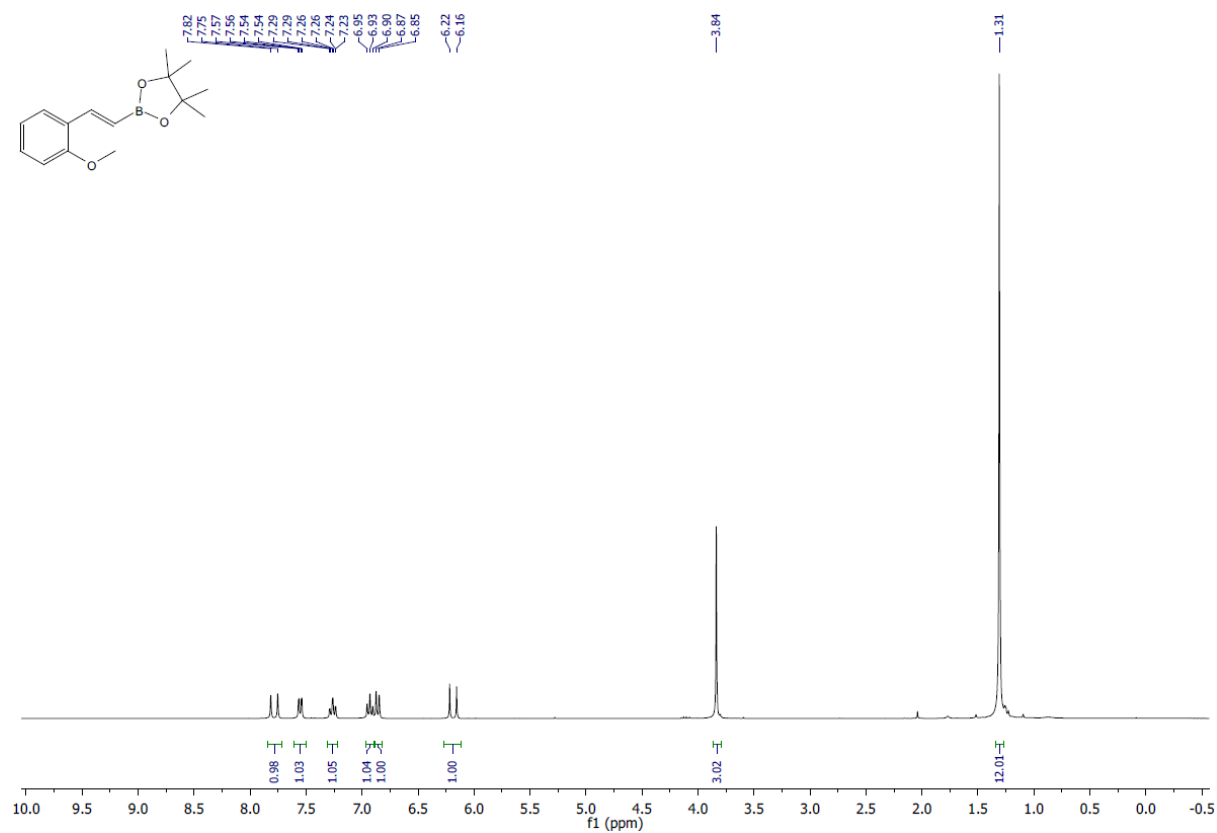

$^{13}\text{C NMR}$  (75 MHz,  $\text{CDCl}_3$ )

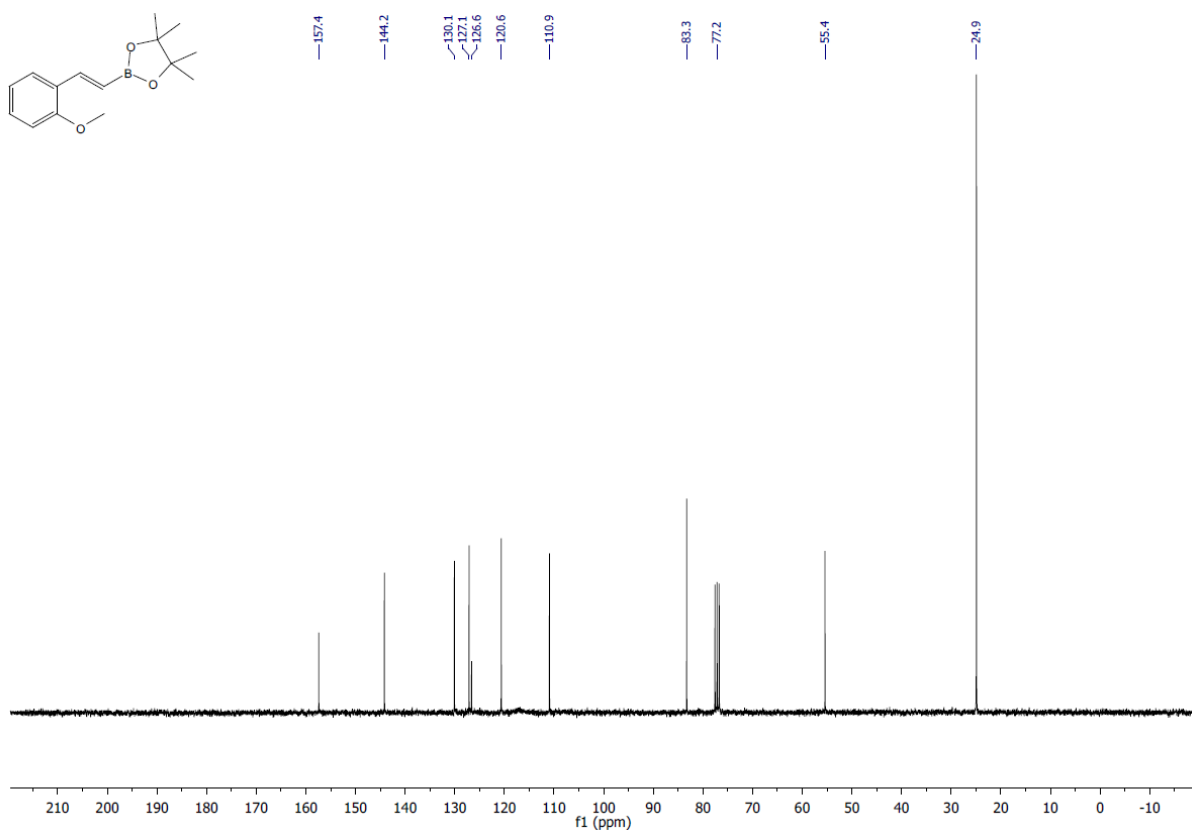

**(E)-2-(2-([1,1'-biphenyl]-4-yl)vinyl)-4,4,5,5-tetramethyl-1,3,2-dioxaborolane (8)**

<sup>1</sup>H NMR (300 MHz, CDCl<sub>3</sub>)

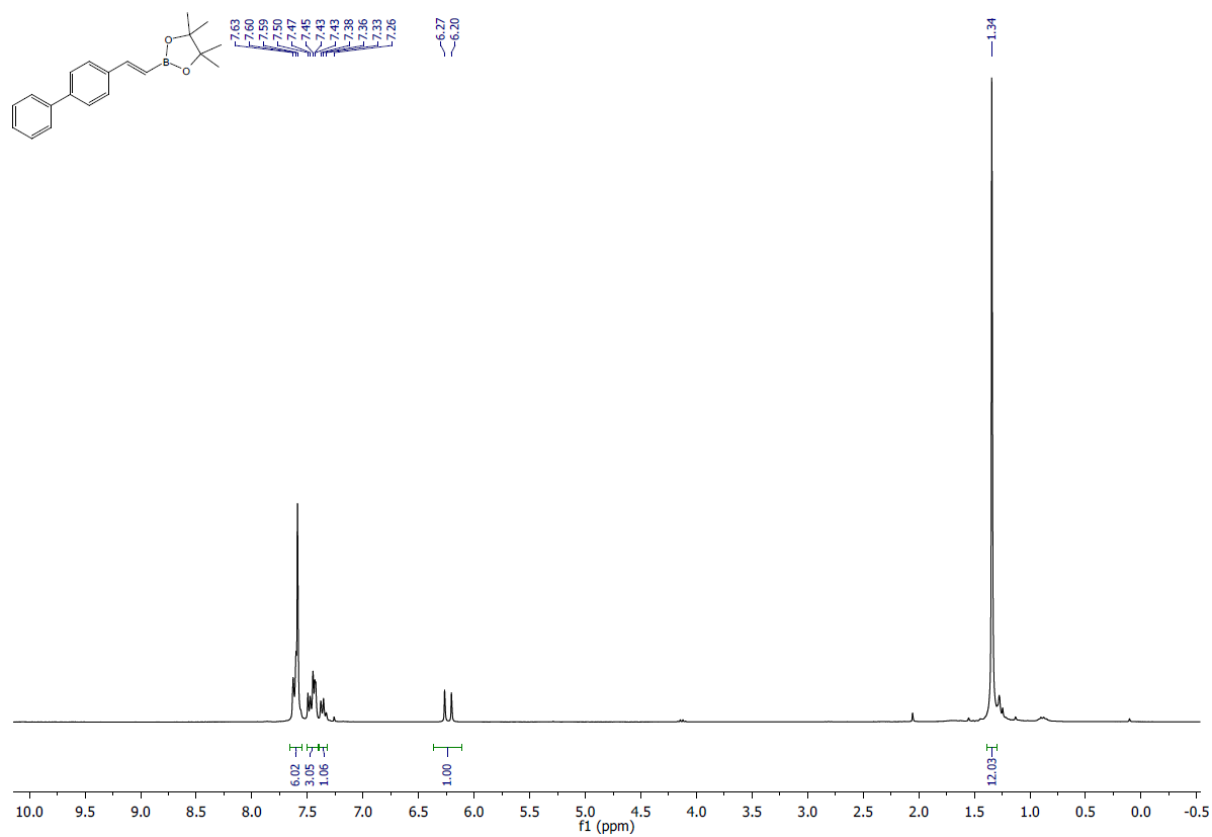

<sup>13</sup>C NMR (75 MHz, CDCl<sub>3</sub>)

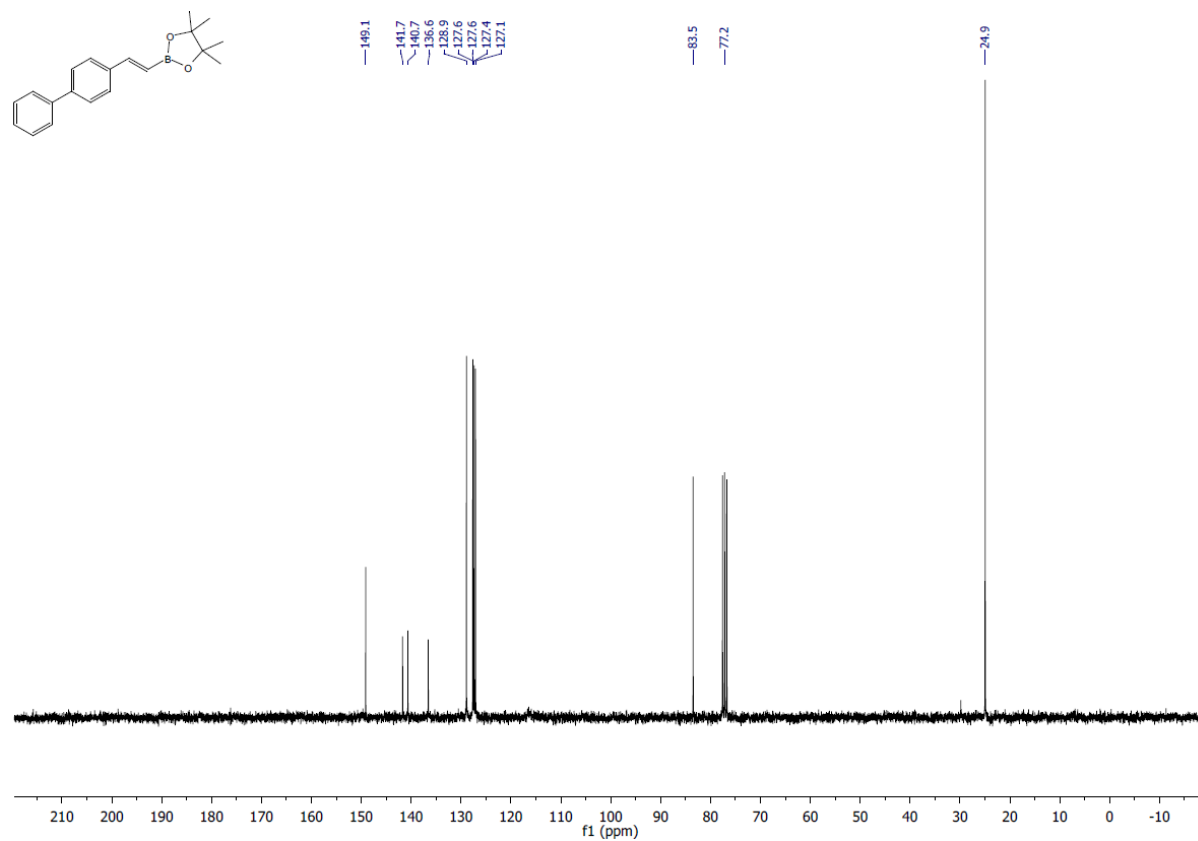

**(E)-N,N-dimethyl-4-(2-(4,4,5,5-tetramethyl-1,3,2-dioxaborolan-2-yl)vinyl)aniline (9)**

<sup>1</sup>H NMR (300 MHz, CDCl<sub>3</sub>)

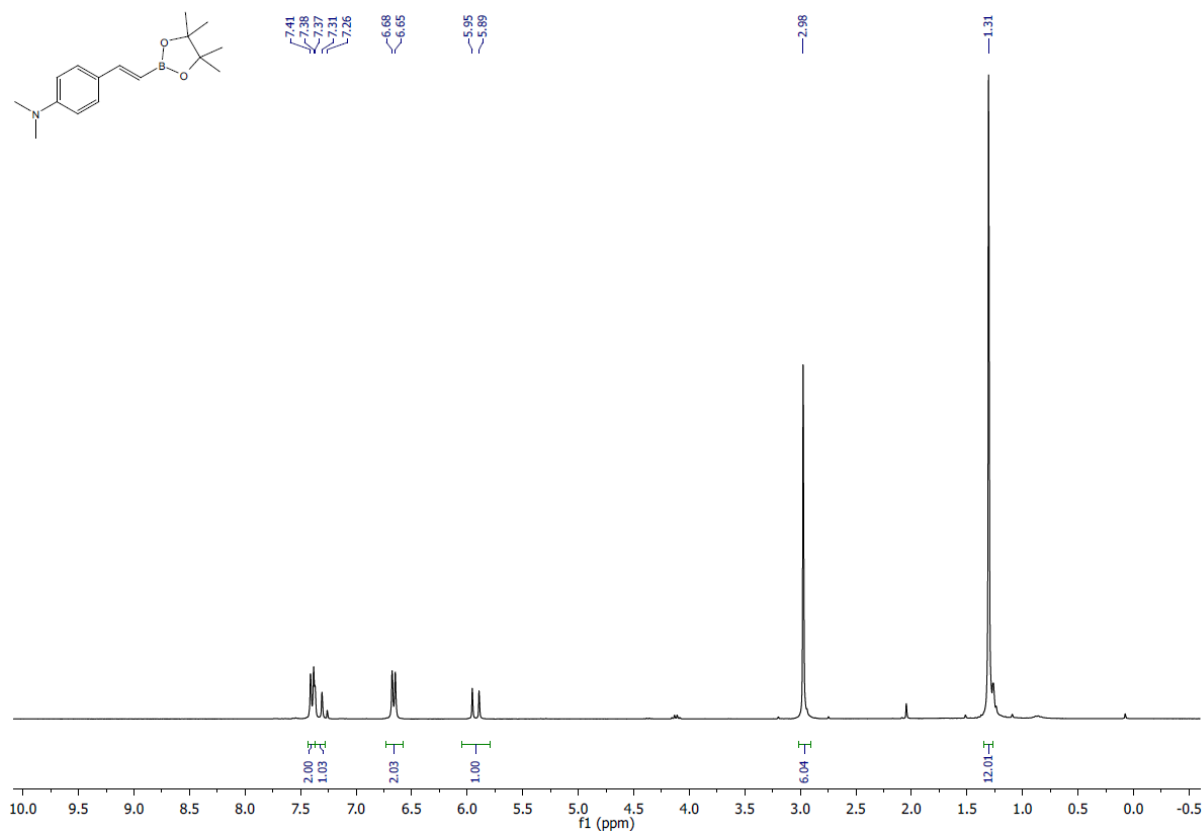

<sup>13</sup>C NMR (75 MHz, CDCl<sub>3</sub>)

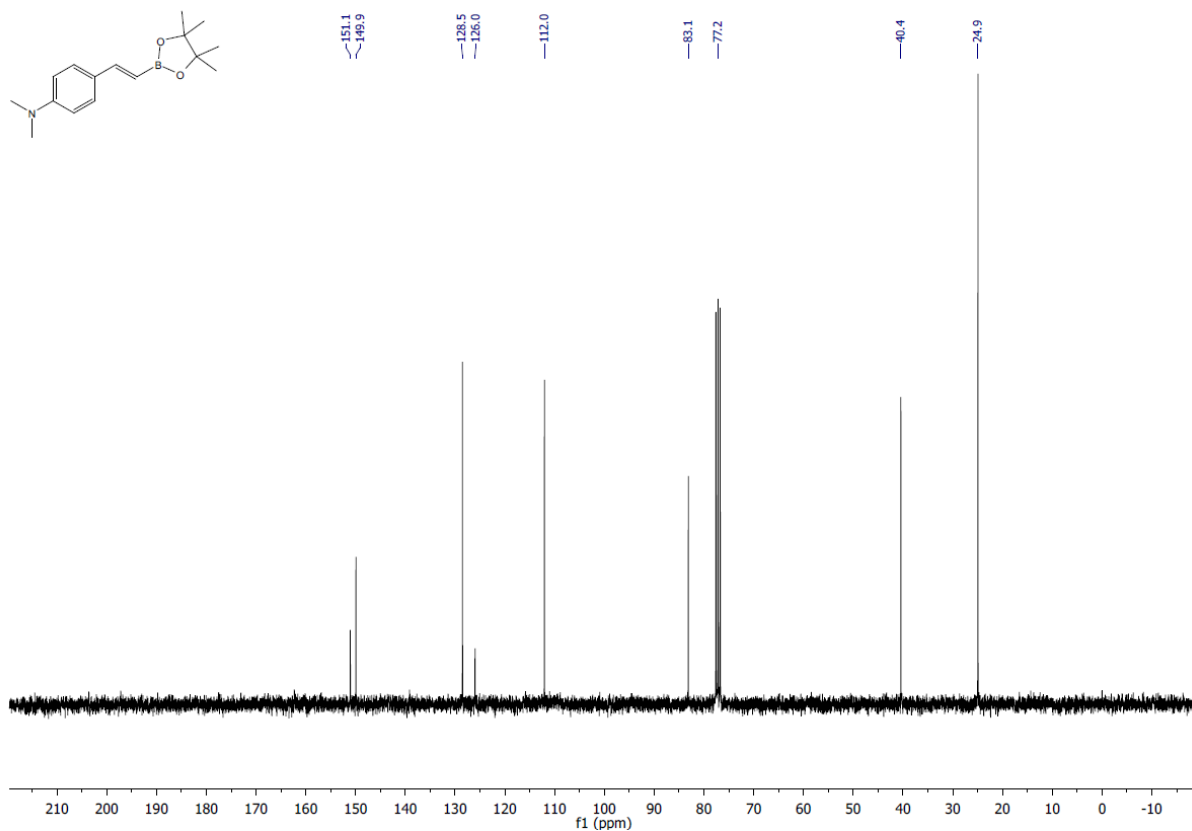

### (E)-3-(2-(4,4,5,5-tetramethyl-1,3,2-dioxaborolan-2-yl)vinyl)aniline (10)

<sup>1</sup>H NMR (300 MHz, CDCl<sub>3</sub>)

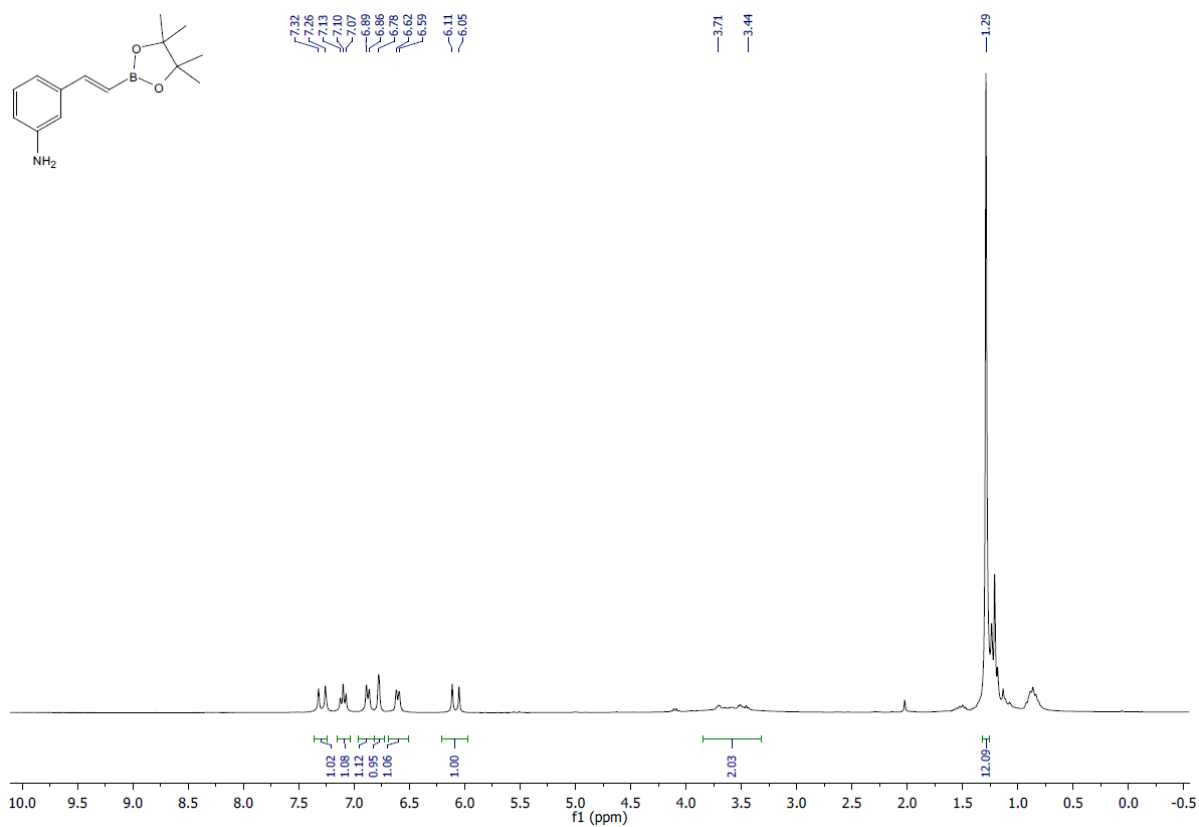

<sup>13</sup>C NMR (75 MHz, CDCl<sub>3</sub>)

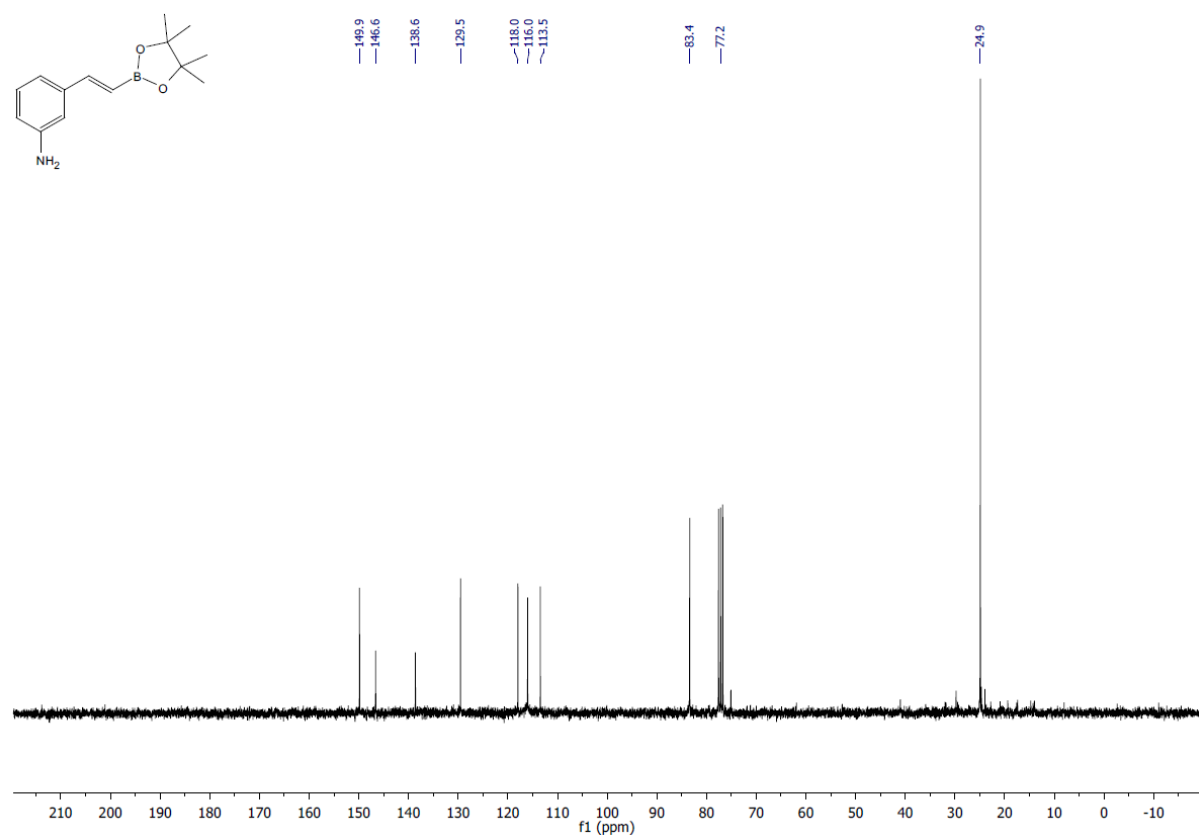

**(E)-2-(2-(4,4,5,5-tetramethyl-1,3,2-dioxaborolan-2-yl)vinyl)aniline (11)**

<sup>1</sup>H NMR (300 MHz, CDCl<sub>3</sub>)

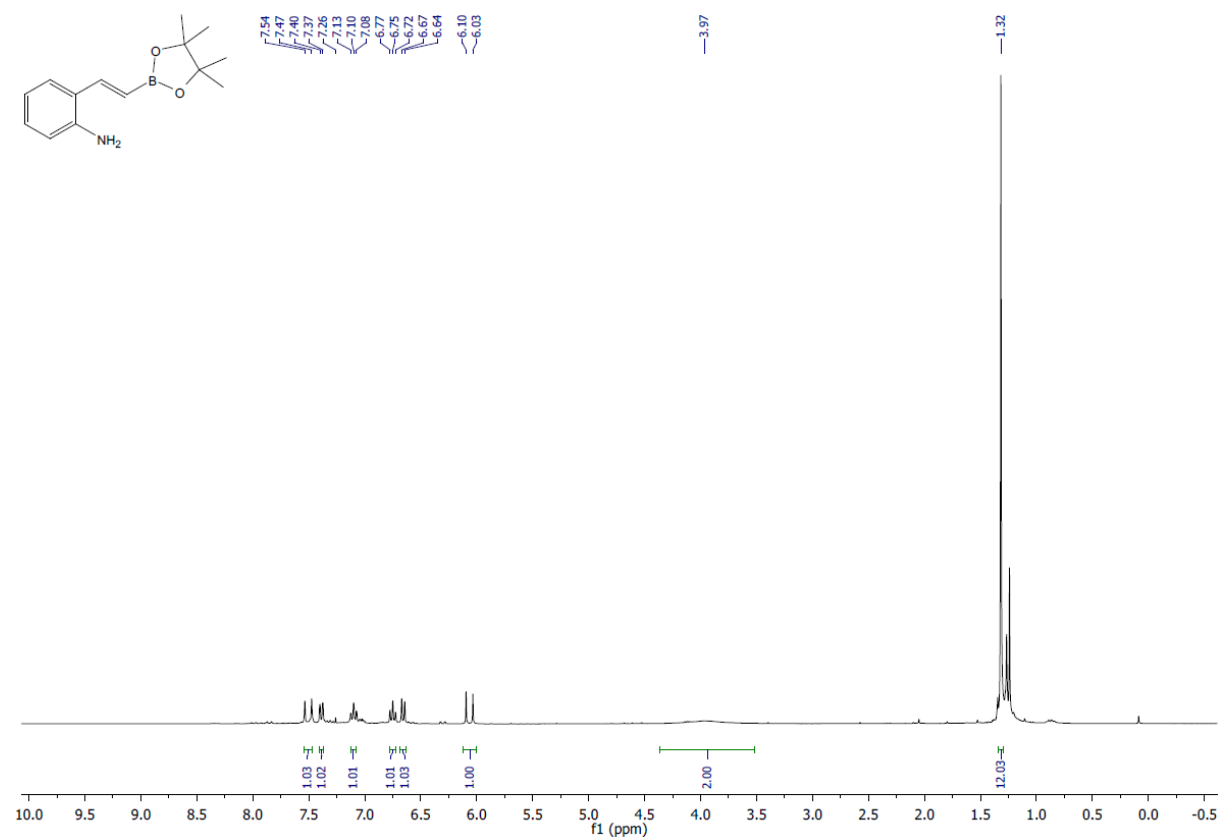

<sup>13</sup>C NMR (75 MHz, CDCl<sub>3</sub>)

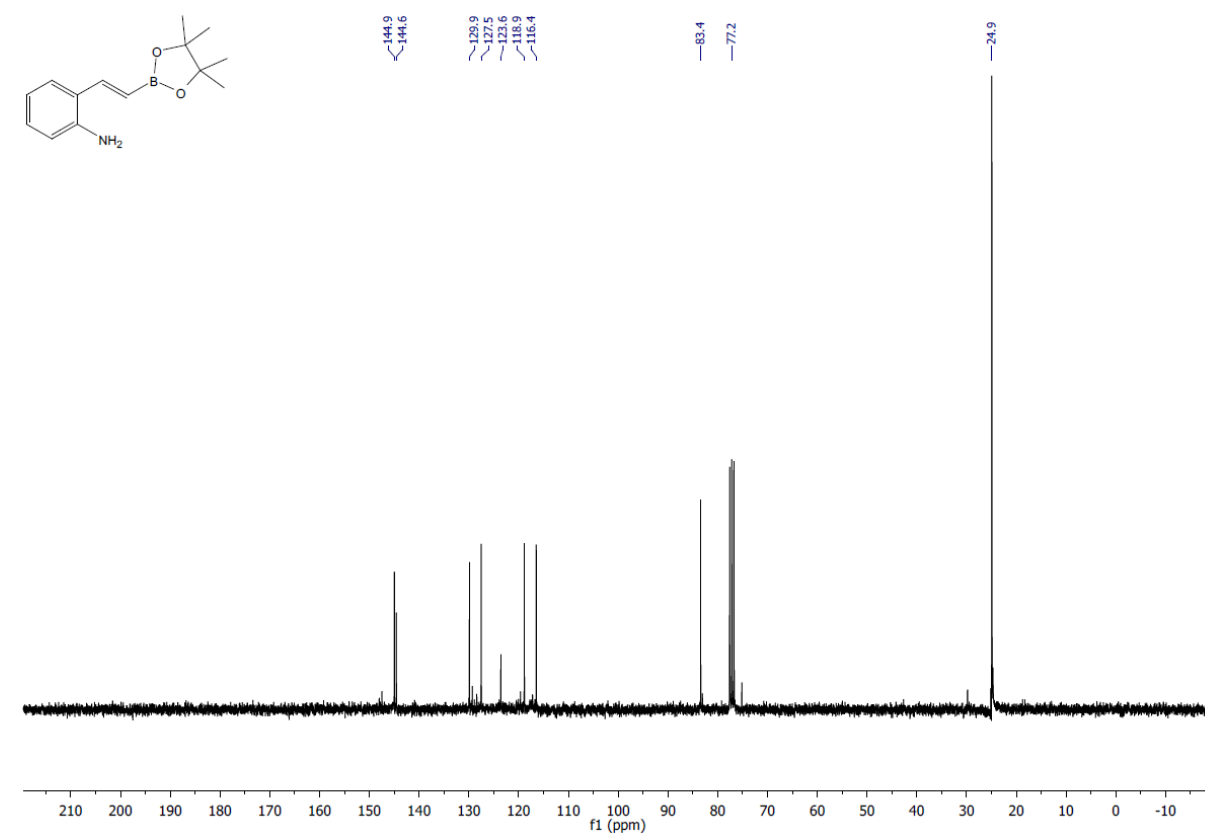

**(E)-4,4,5,5-tetramethyl-2-(4-(4,4,5,5-tetramethyl-1,3,2-dioxaborolan-2-yl)styryl)-1,3,2-dioxaborolane (12):**

<sup>1</sup>H NMR (300 MHz, CDCl<sub>3</sub>)

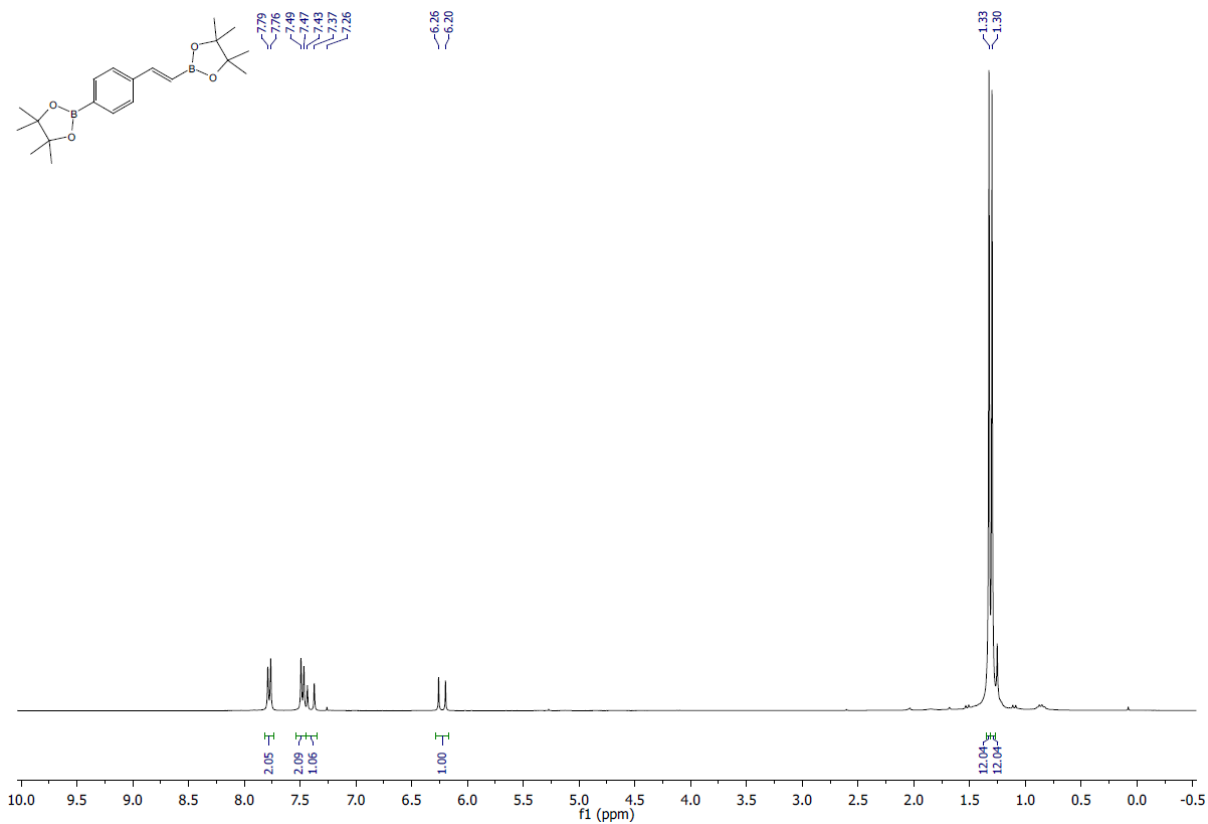

<sup>13</sup>C NMR (75 MHz, CDCl<sub>3</sub>)

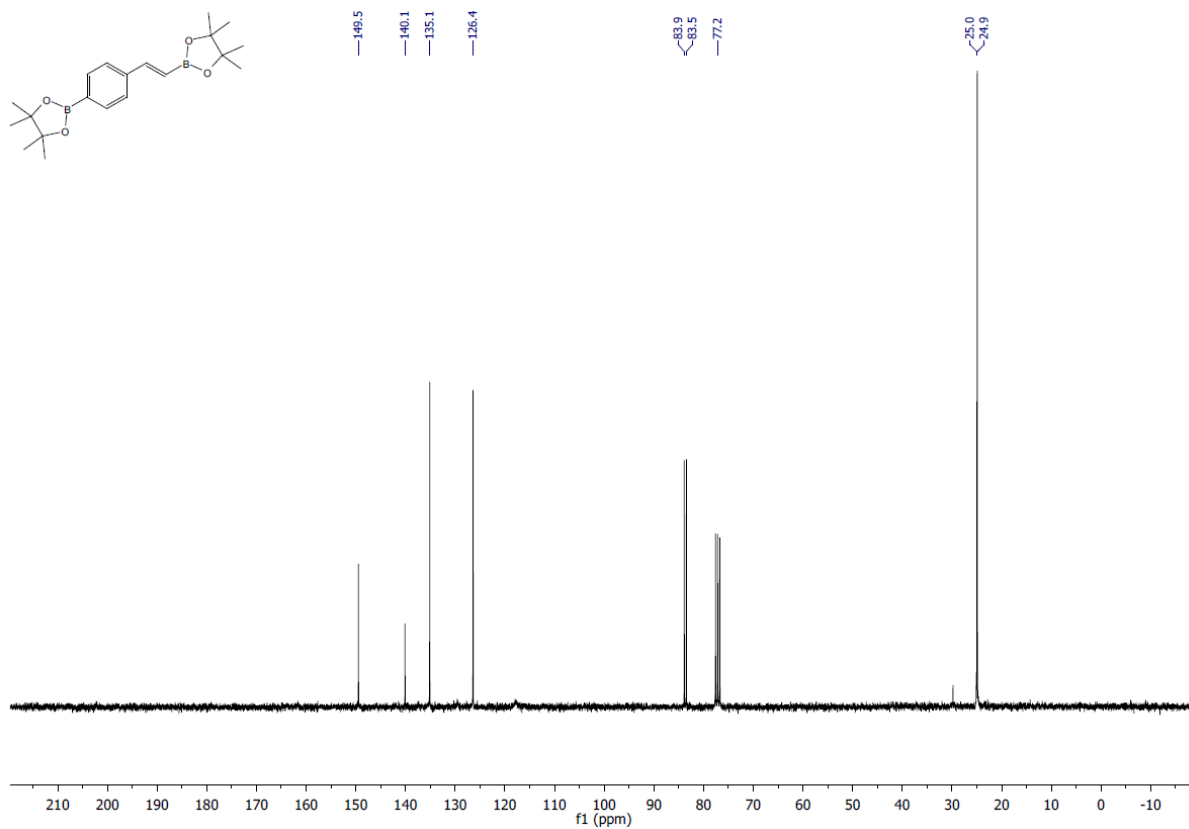

**(E)-4-(2-(4,4,5,5-tetramethyl-1,3,2-dioxaborolan-2-yl)vinyl)phenyl)methanol (13):**

$^1\text{H}$  NMR (300 MHz,  $\text{CDCl}_3$ )

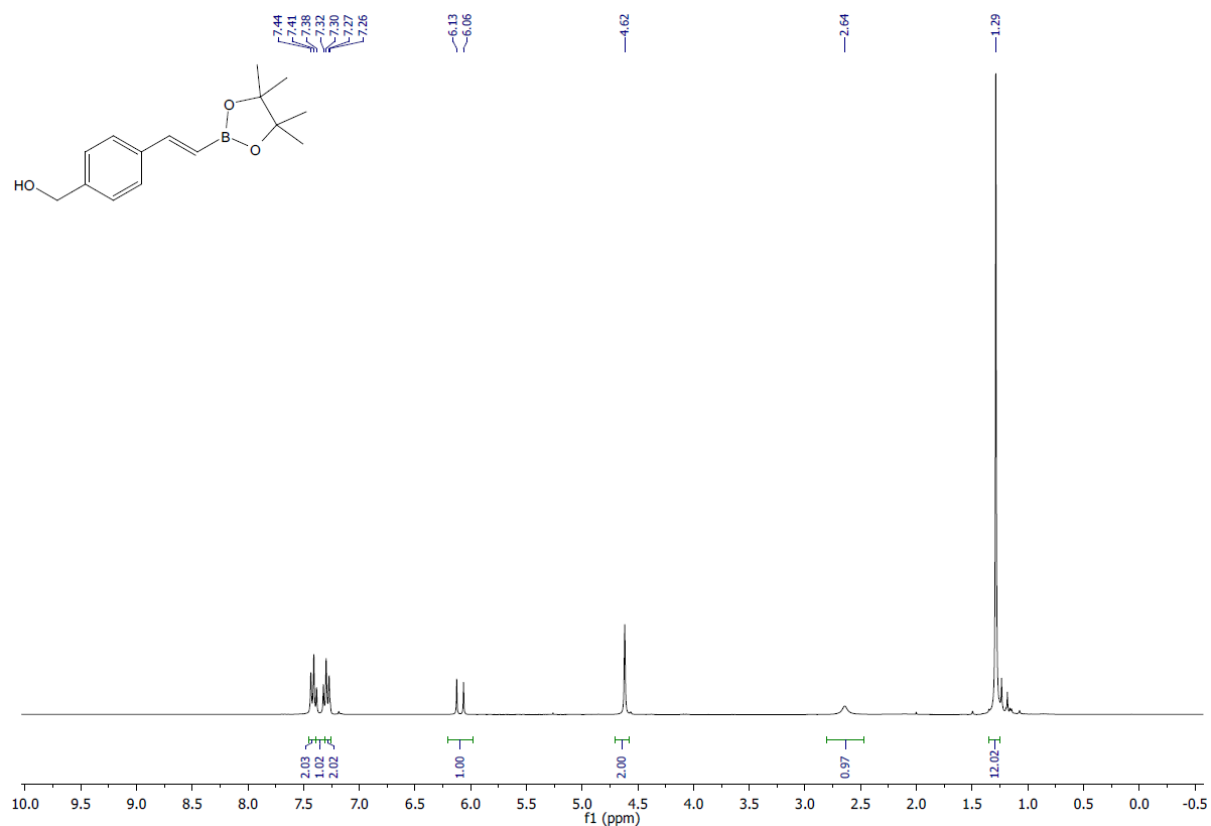

$^{13}\text{C}$  NMR (75 MHz,  $\text{CDCl}_3$ )

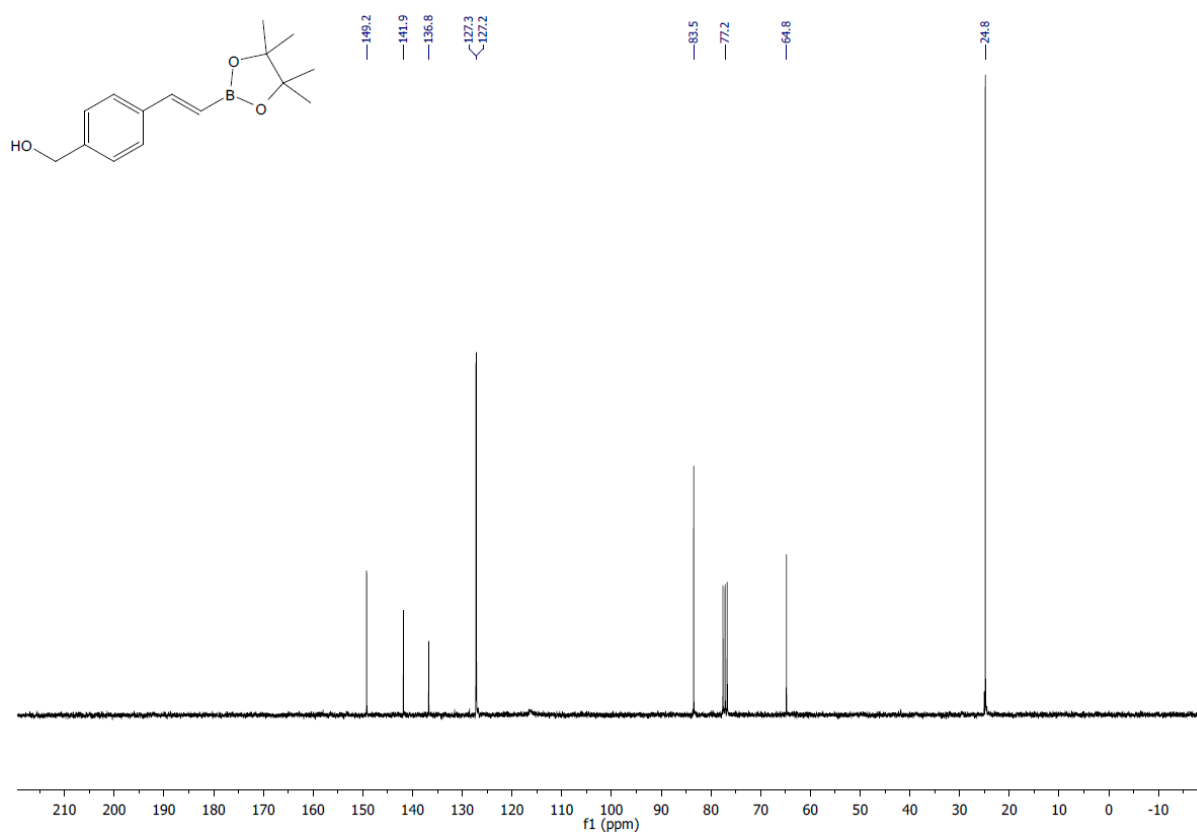



**(E)-4,4,5,5-tetramethyl-2-(4-(2-methyl-1,3-dioxolan-2-yl)styryl)-1,3,2-dioxaborolane (14)**

<sup>1</sup>H NMR (300 MHz, CDCl<sub>3</sub>)

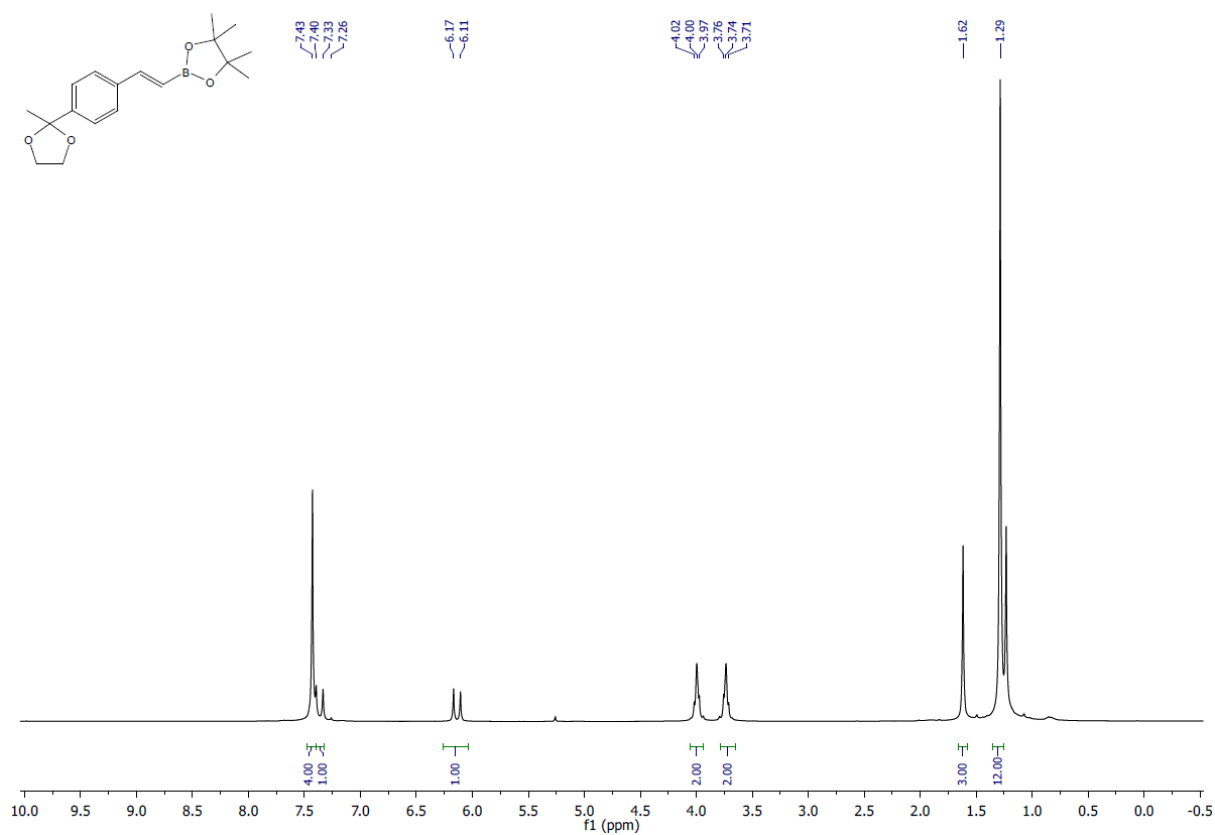

<sup>13</sup>C NMR (75 MHz, CDCl<sub>3</sub>)

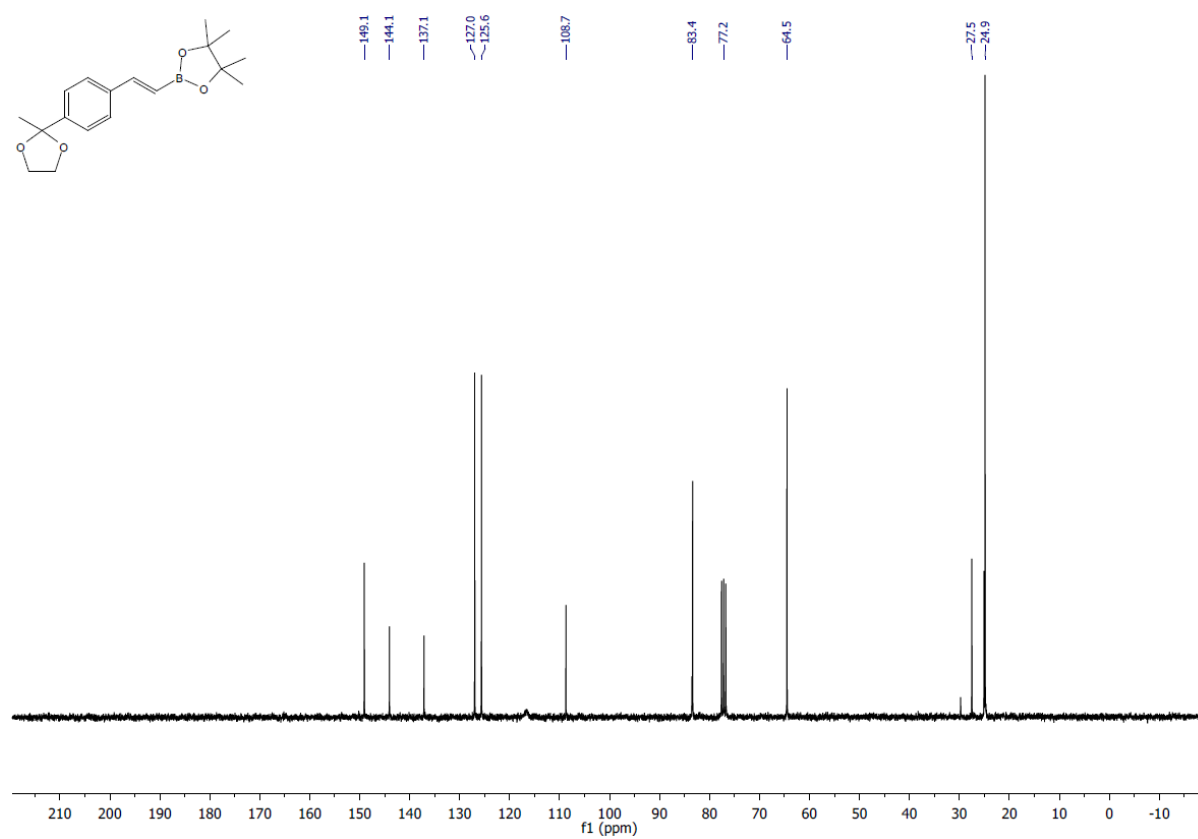

**(E)-2-(4-fluorostyryl)-4,4,5,5-tetramethyl-1,3,2-dioxaborolane (15)**

<sup>1</sup>H NMR (300 MHz, CDCl<sub>3</sub>)

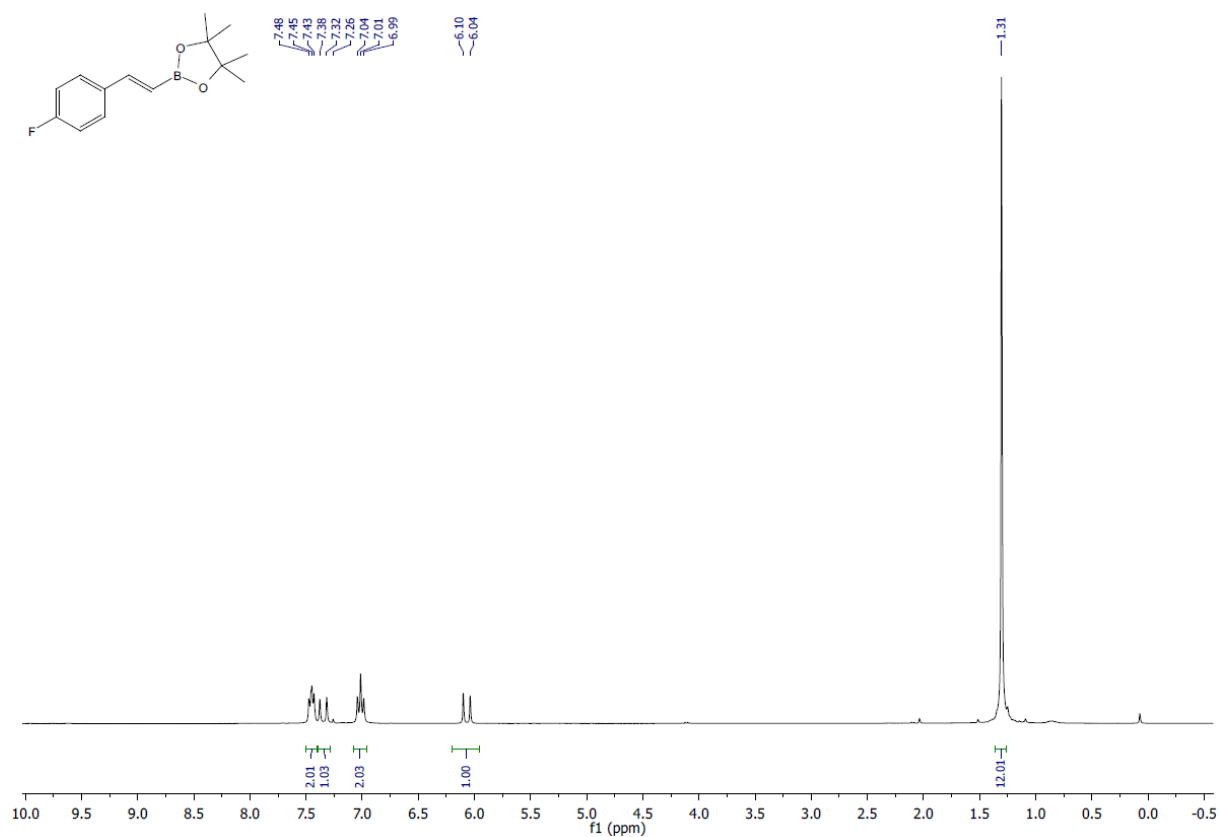

<sup>13</sup>C NMR (75 MHz, CDCl<sub>3</sub>)

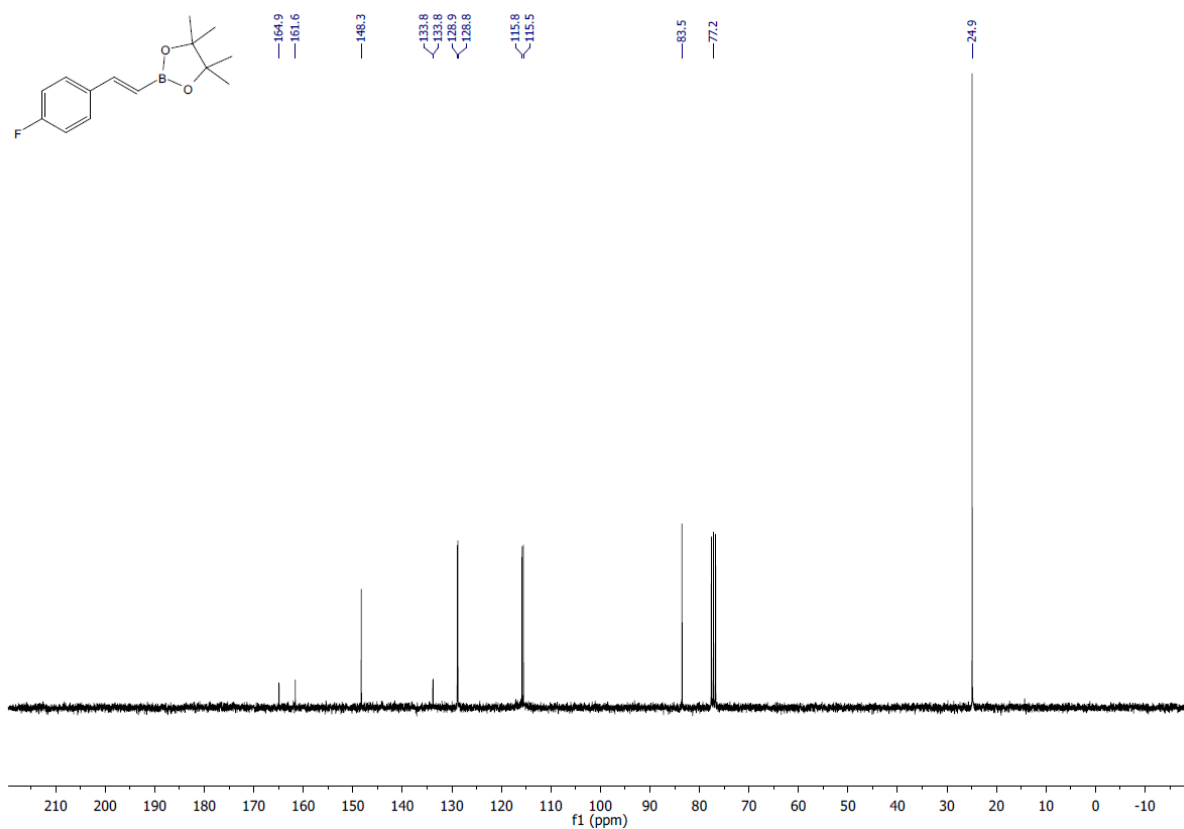

**(E)-2-(4-chlorostyryl)-4,4,5,5-tetramethyl-1,3,2-dioxaborolane (16)**

<sup>1</sup>H NMR (300 MHz, CDCl<sub>3</sub>)

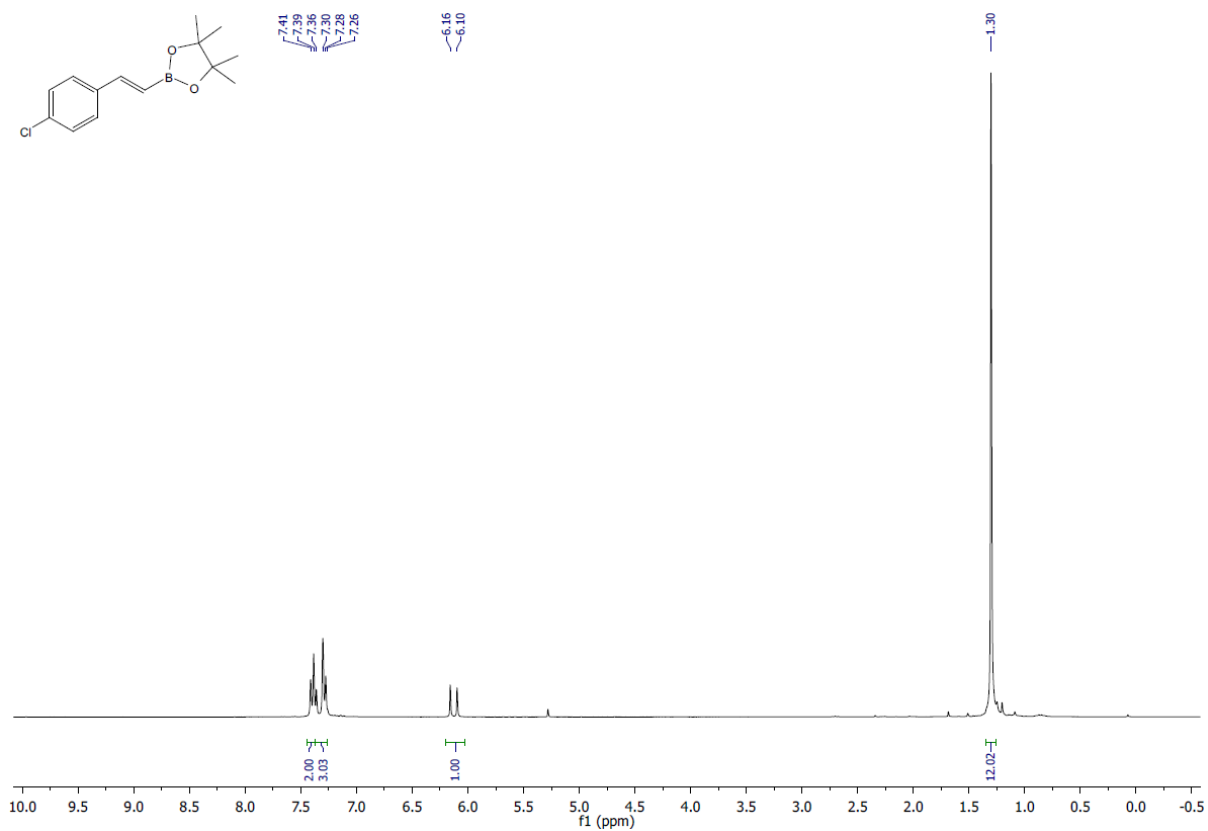

<sup>13</sup>C NMR (75 MHz, CDCl<sub>3</sub>)

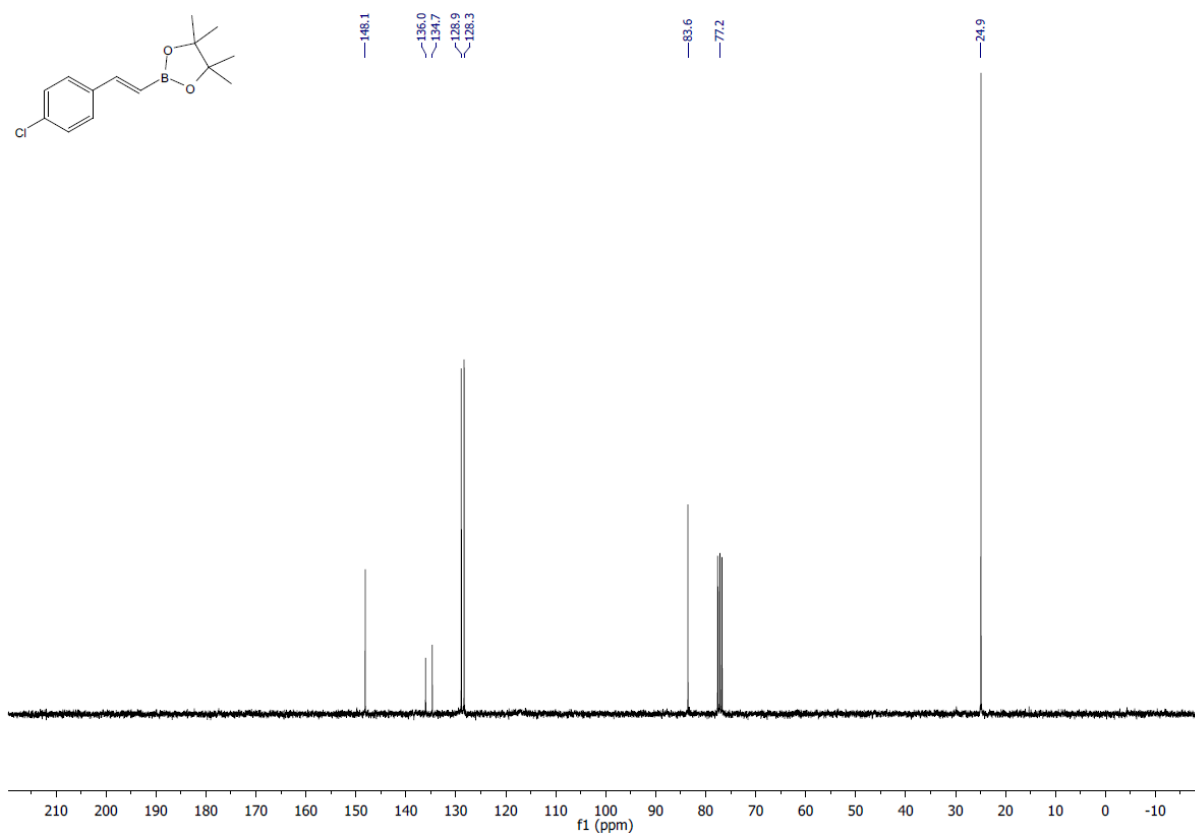

**(E)-2-(4-bromostyryl)-4,4,5,5-tetramethyl-1,3,2-dioxaborolane (17)**

<sup>1</sup>H NMR (300 MHz, CDCl<sub>3</sub>)

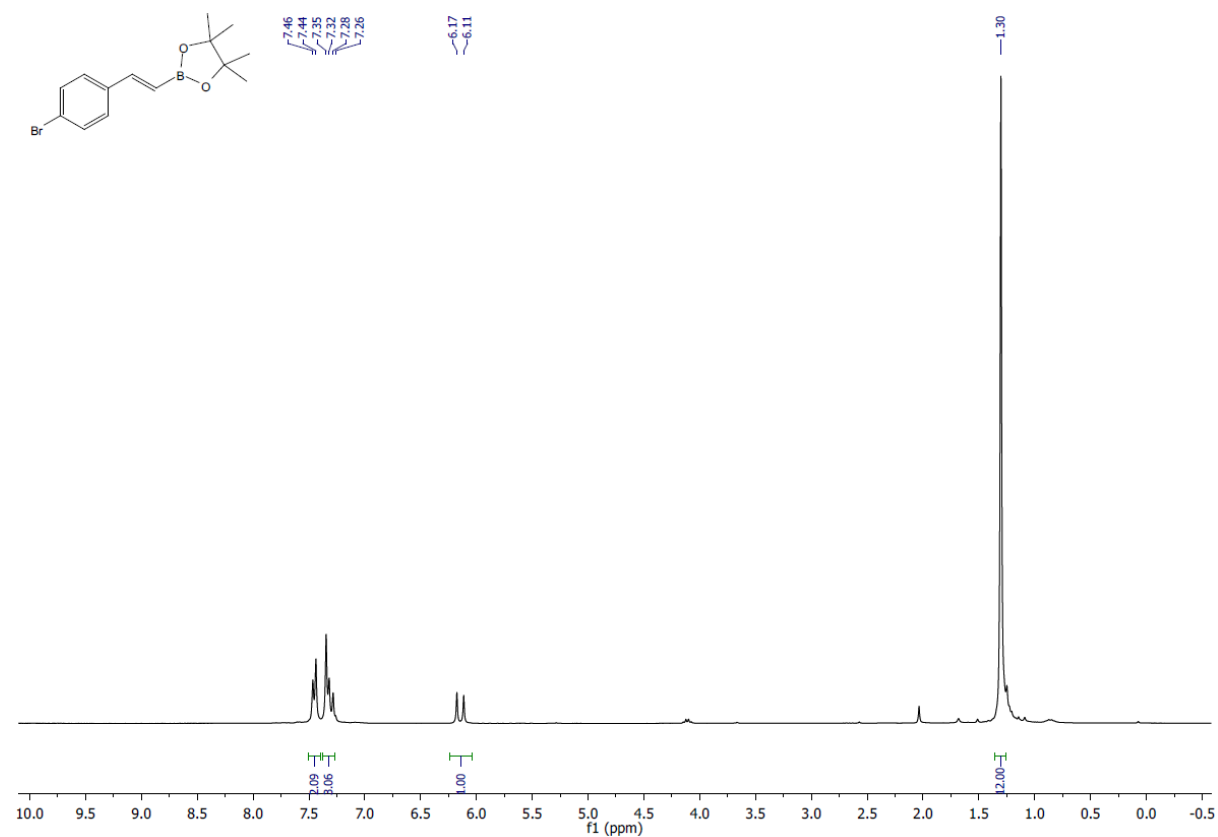

<sup>13</sup>C NMR (75 MHz, CDCl<sub>3</sub>)

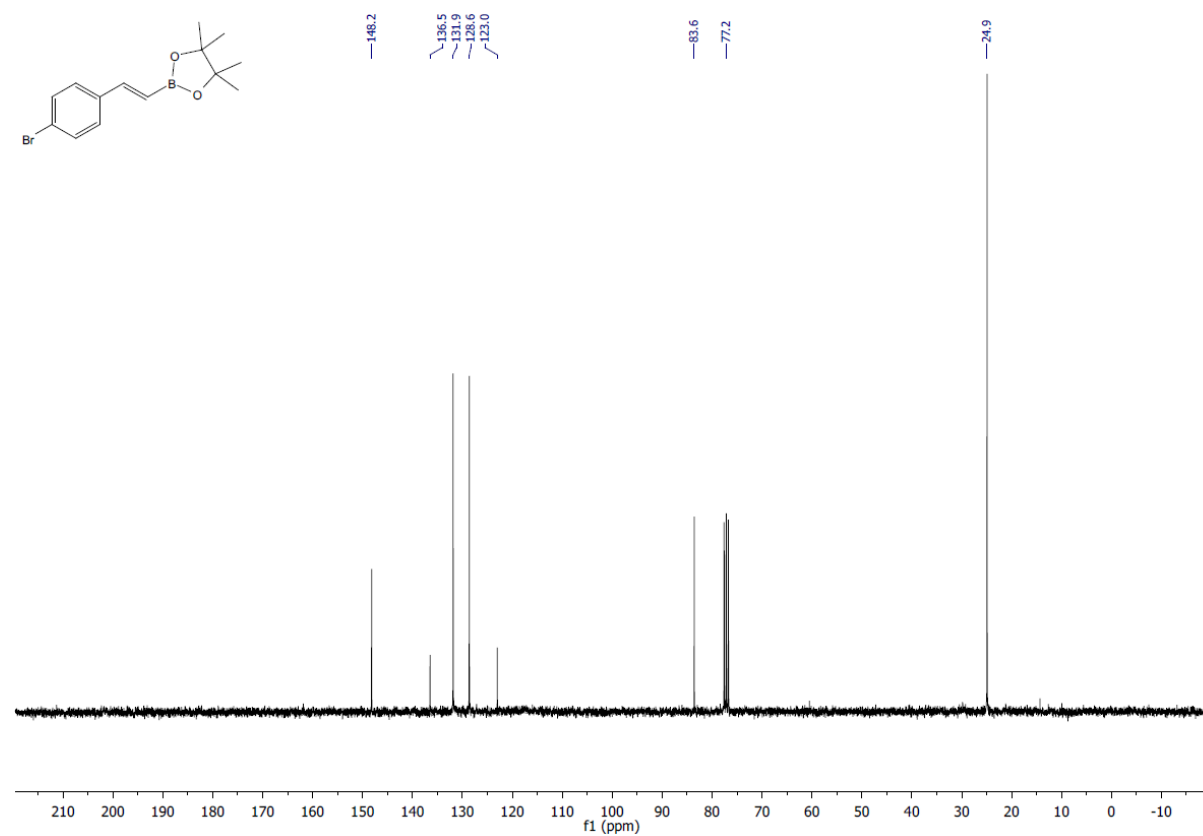

**(E)-2-(3-fluorostyryl)-4,4,5,5-tetramethyl-1,3,2-dioxaborolane (18)**

$^1\text{H NMR}$  (300 MHz,  $\text{CDCl}_3$ )

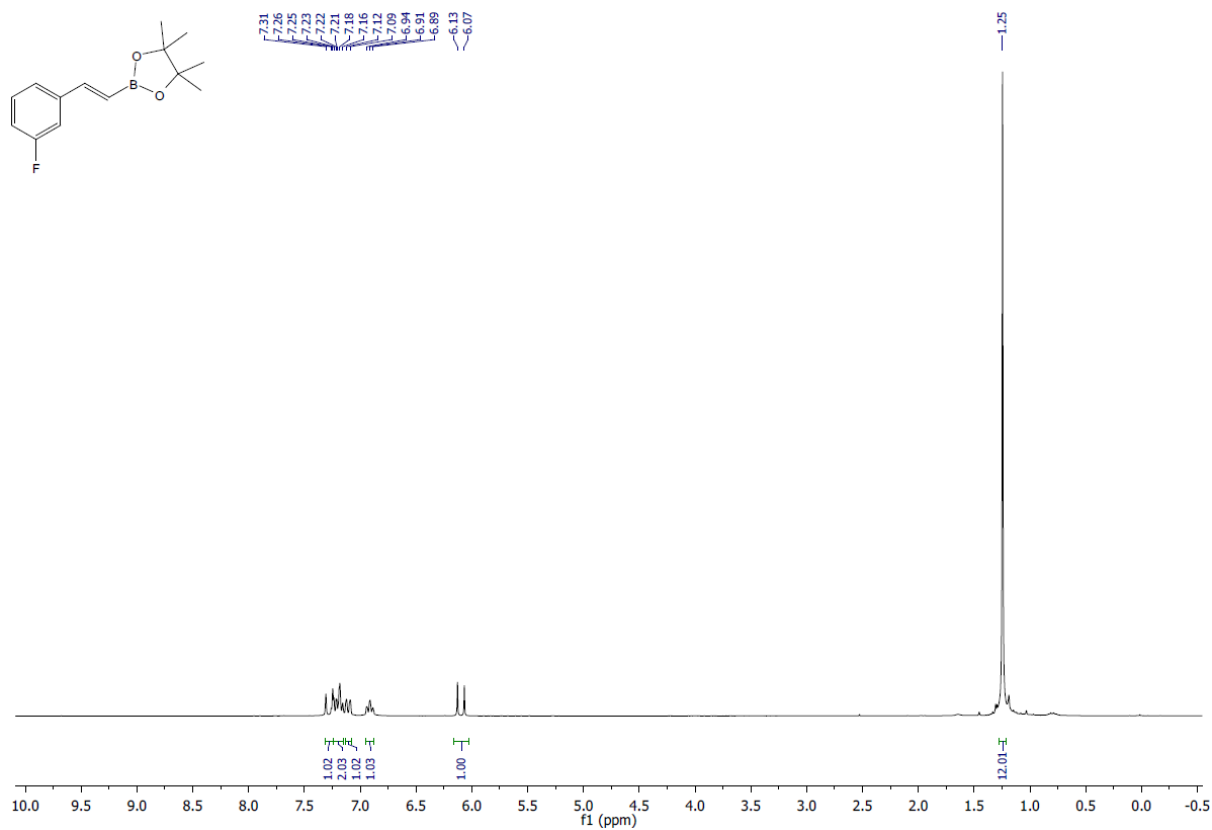

$^{13}\text{C NMR}$  (75 MHz,  $\text{CDCl}_3$ )

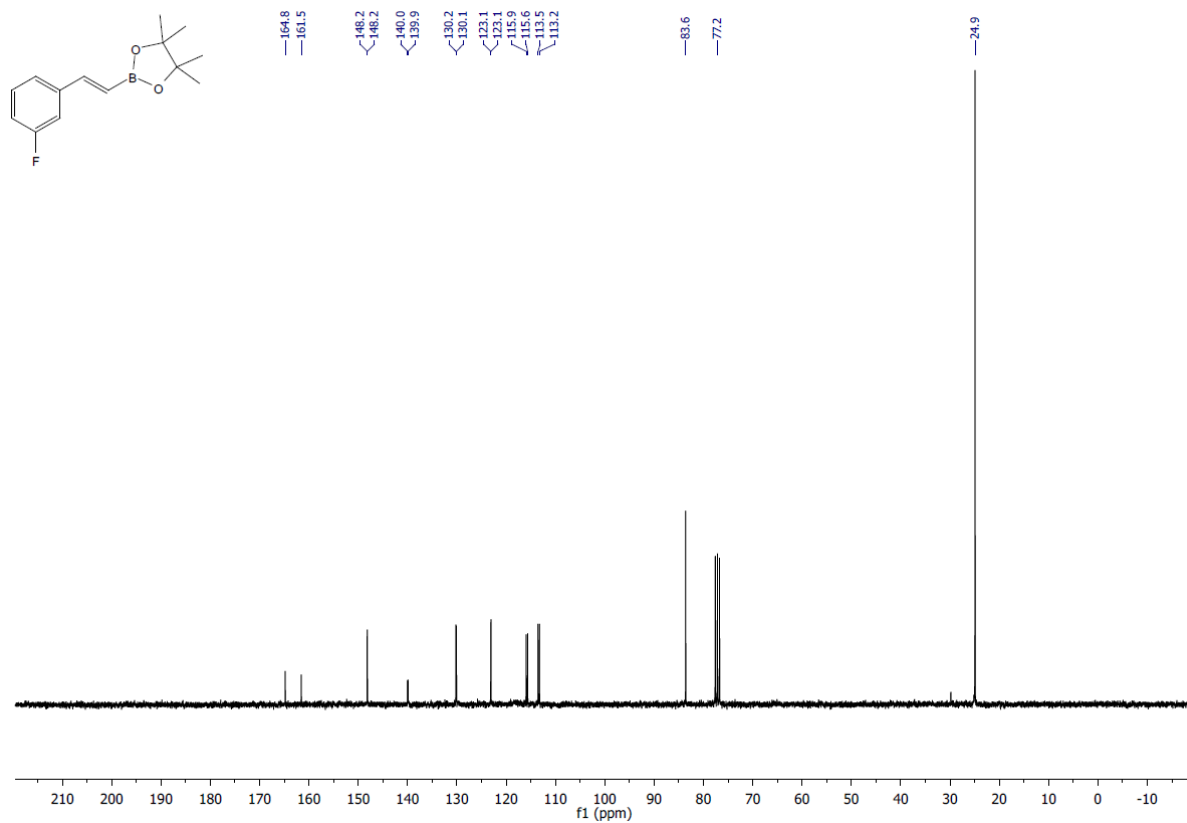

**(E)-2-(2,4-difluorostyryl)-4,4,5,5-tetramethyl-1,3,2-dioxaborolane (19)**

<sup>1</sup>H NMR (300 MHz, CDCl<sub>3</sub>)

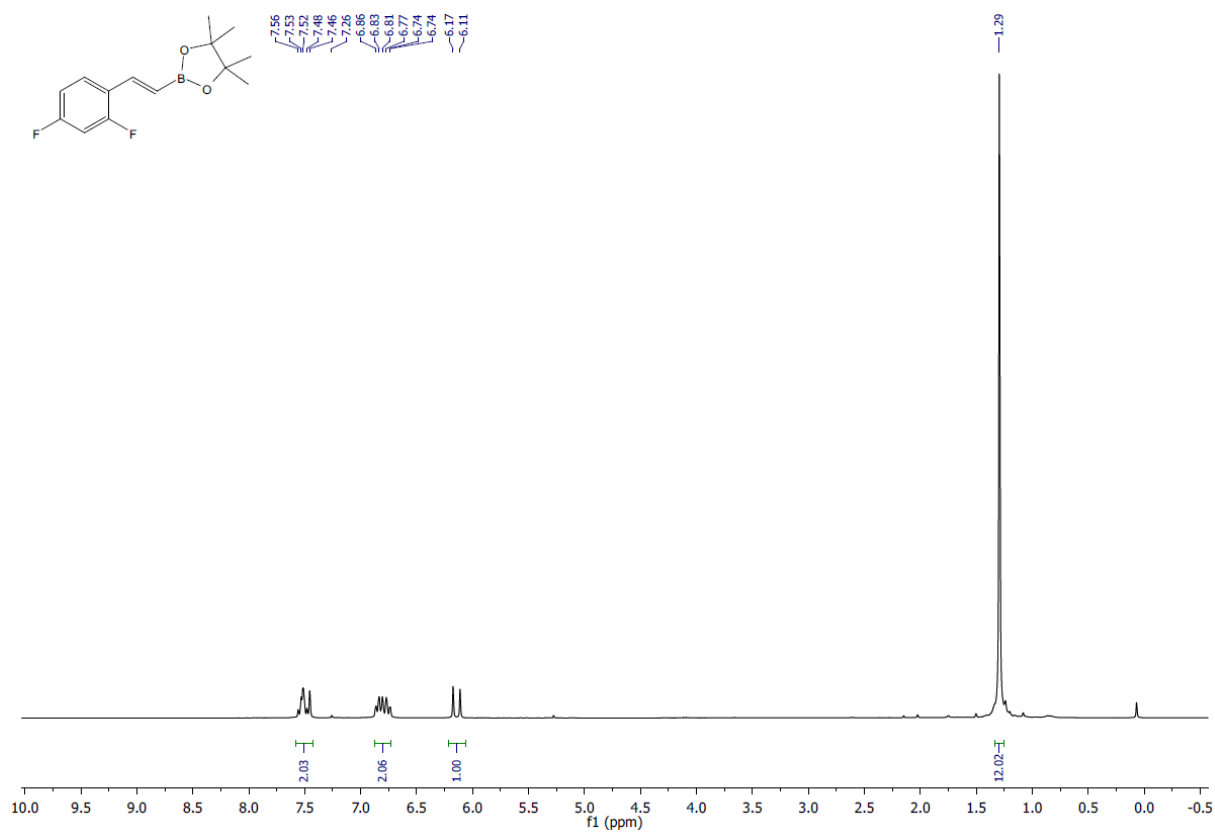

<sup>13</sup>C NMR (75 MHz, CDCl<sub>3</sub>)

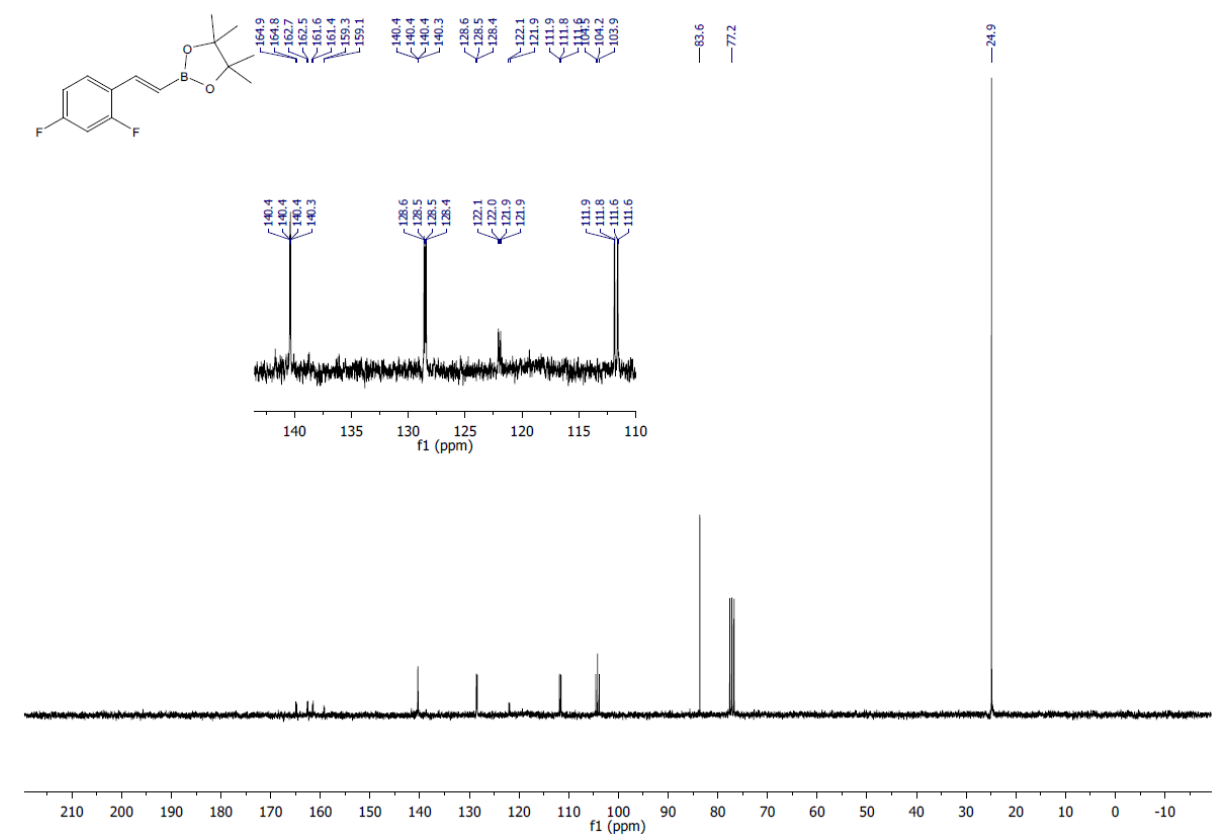

**(E)-4,4,5,5-tetramethyl-2-(4-(trifluoromethyl)styryl)-1,3,2-dioxaborolane (20)**

$^1\text{H NMR}$  (300 MHz,  $\text{CDCl}_3$ )

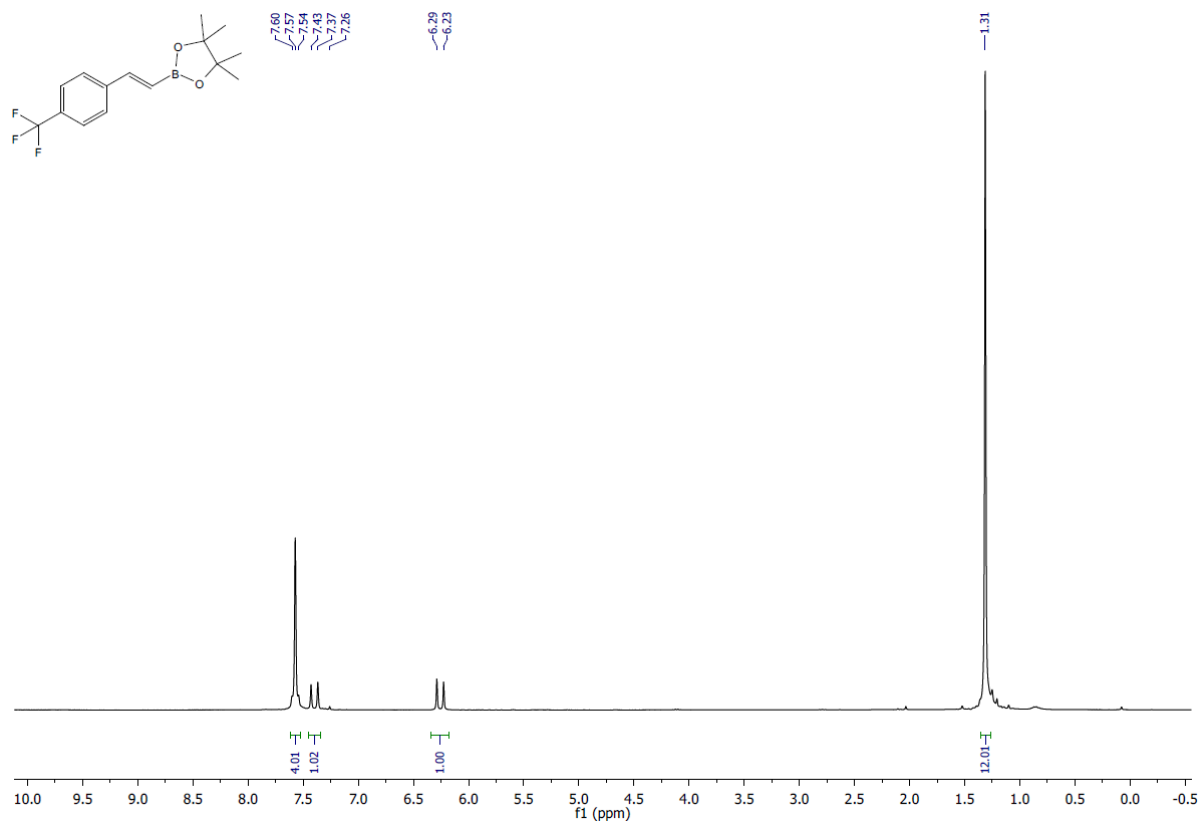

$^{13}\text{C NMR}$  (75 MHz,  $\text{CDCl}_3$ )

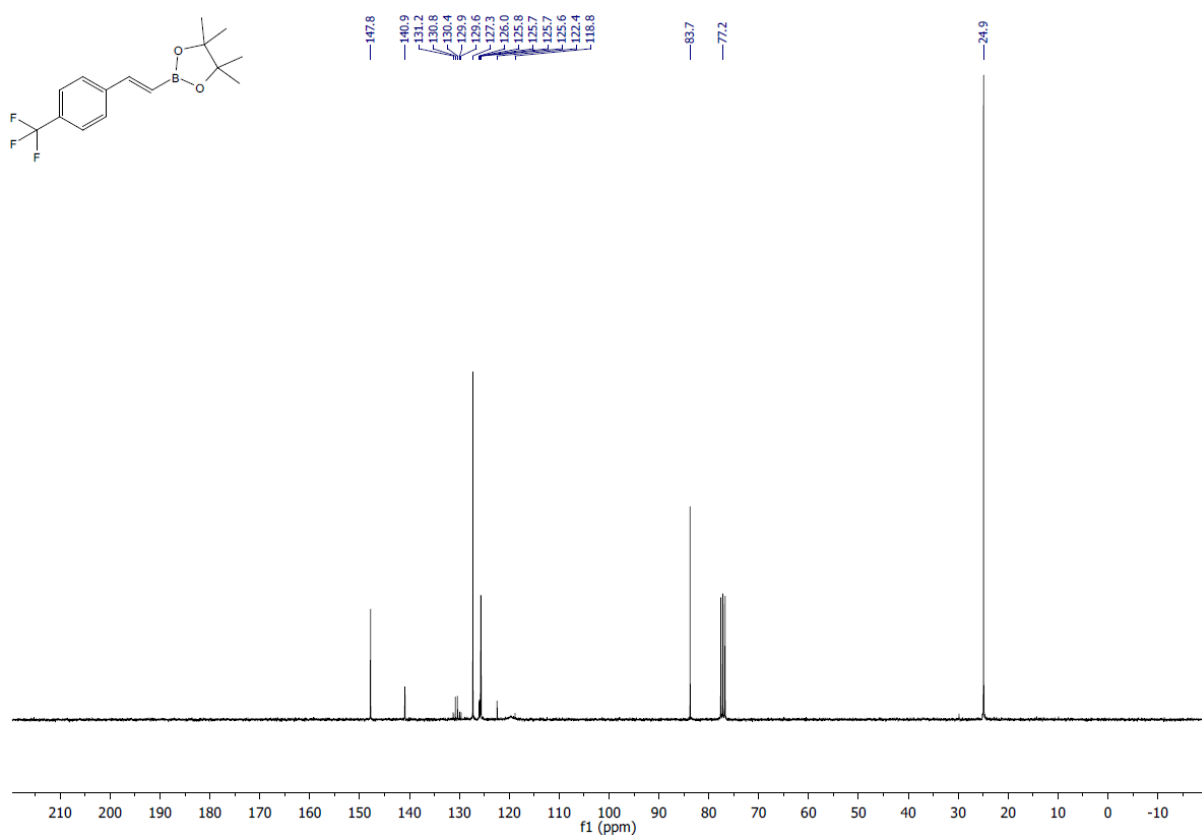

**(E)-4-(2-(4,4,5,5-tetramethyl-1,3,2-dioxaborolan-2-yl)vinyl)benzaldehyde (21)**

<sup>1</sup>H NMR (300 MHz, CDCl<sub>3</sub>)

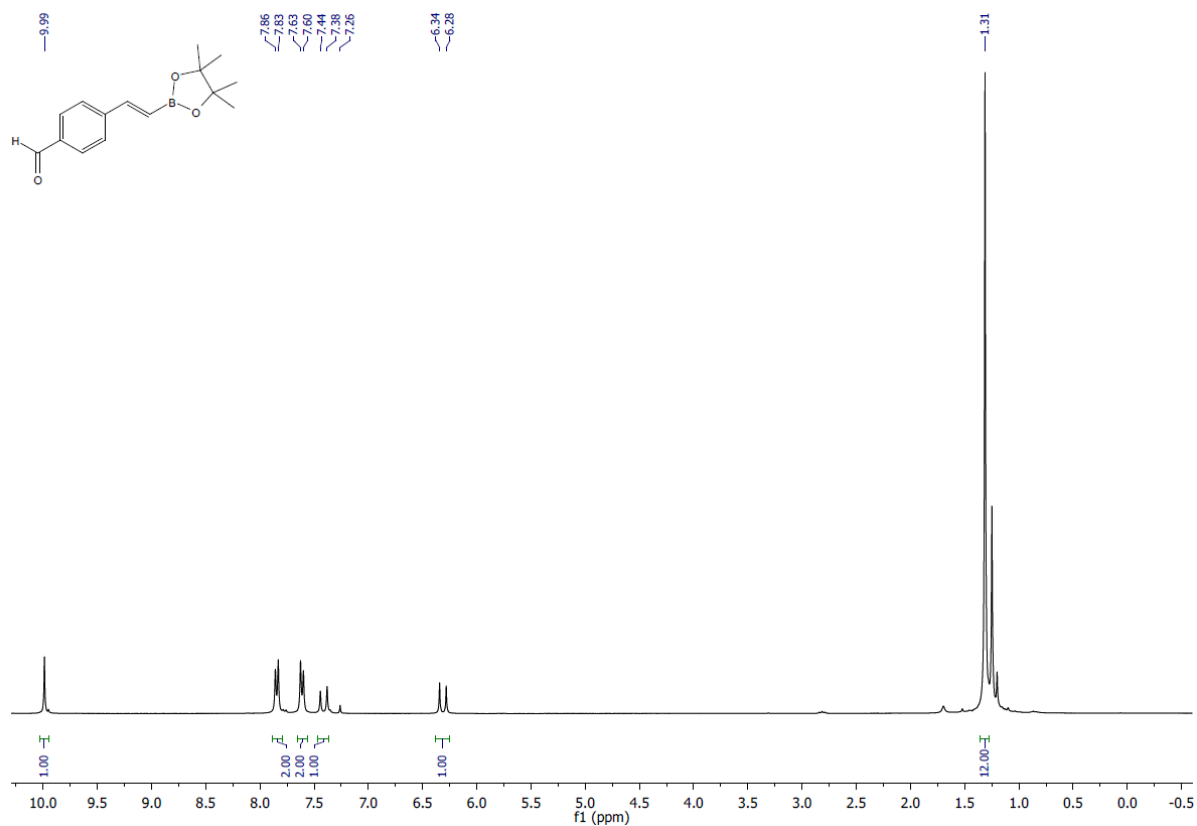

<sup>13</sup>C NMR (75 MHz, CDCl<sub>3</sub>)

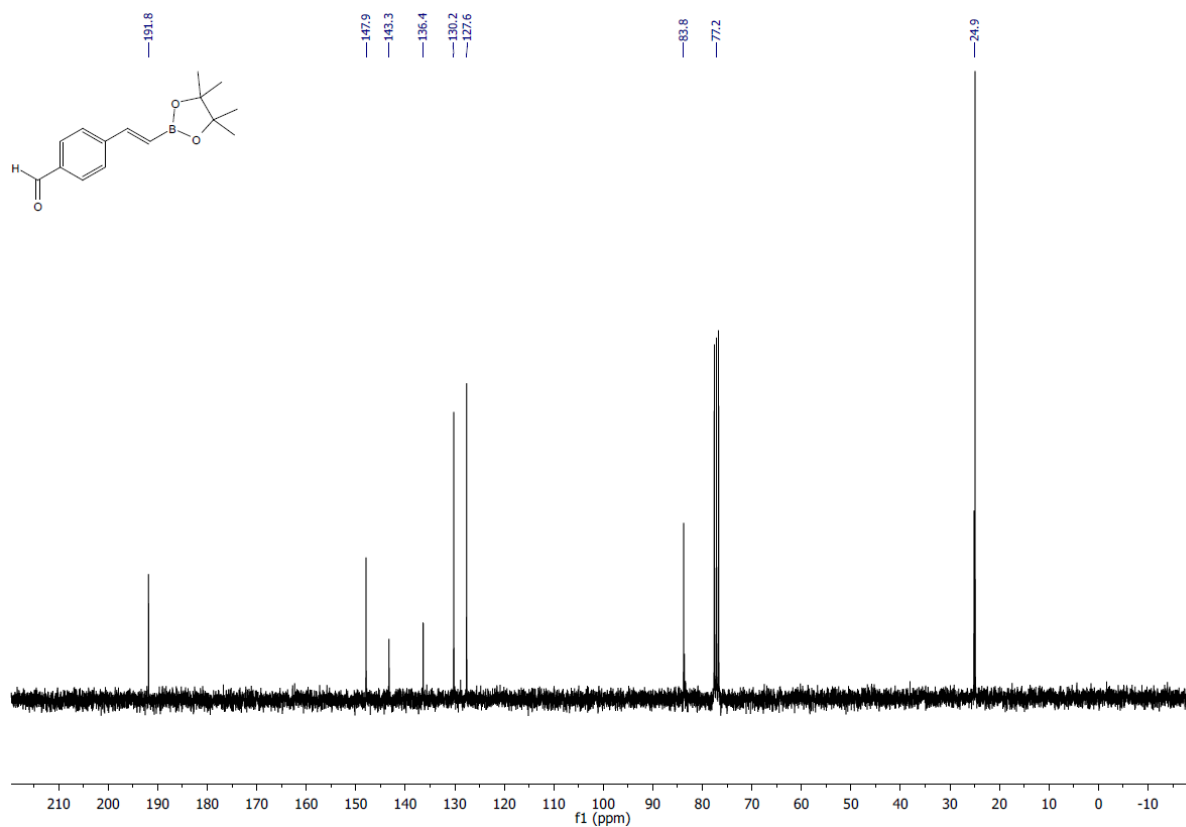



# Methyl (*E*)-4-(2-(4,4,5,5-tetramethyl-1,3,2-dioxaborolan-2-yl)vinyl)benzoate (22)

<sup>1</sup>H NMR (300 MHz, CDCl<sub>3</sub>)

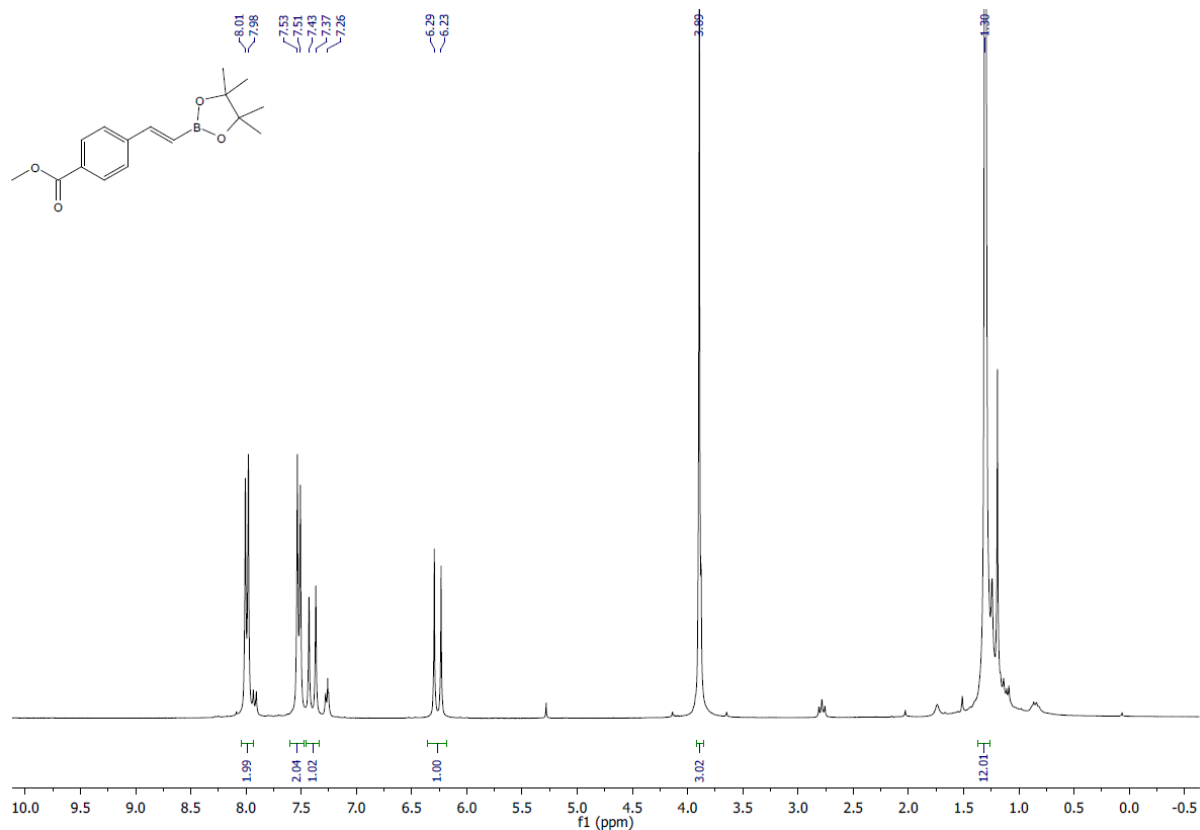

<sup>13</sup>C NMR (75 MHz, CDCl<sub>3</sub>)

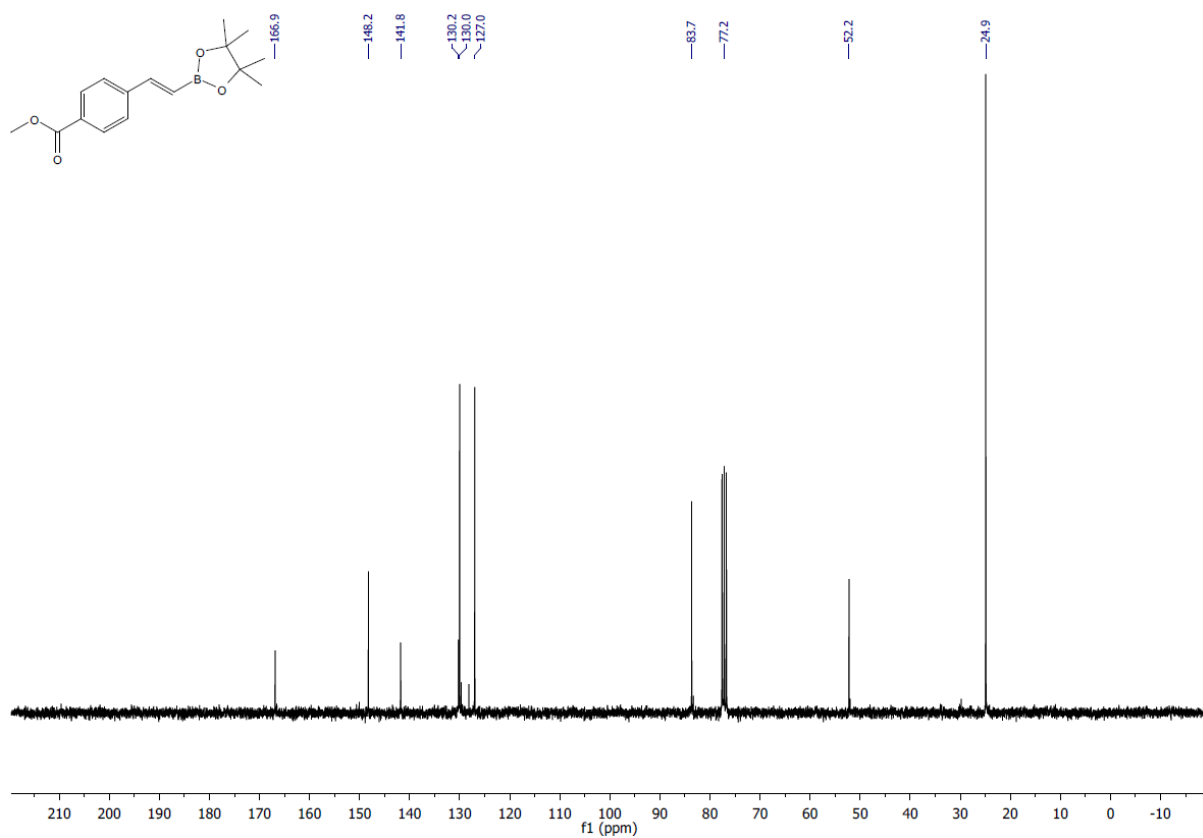

**(E)-4,4,5,5-tetramethyl-2-(2-(naphthalen-2-yl)vinyl)-1,3,2-dioxaborolane (23)**

<sup>1</sup>H NMR (300 MHz, CDCl<sub>3</sub>)

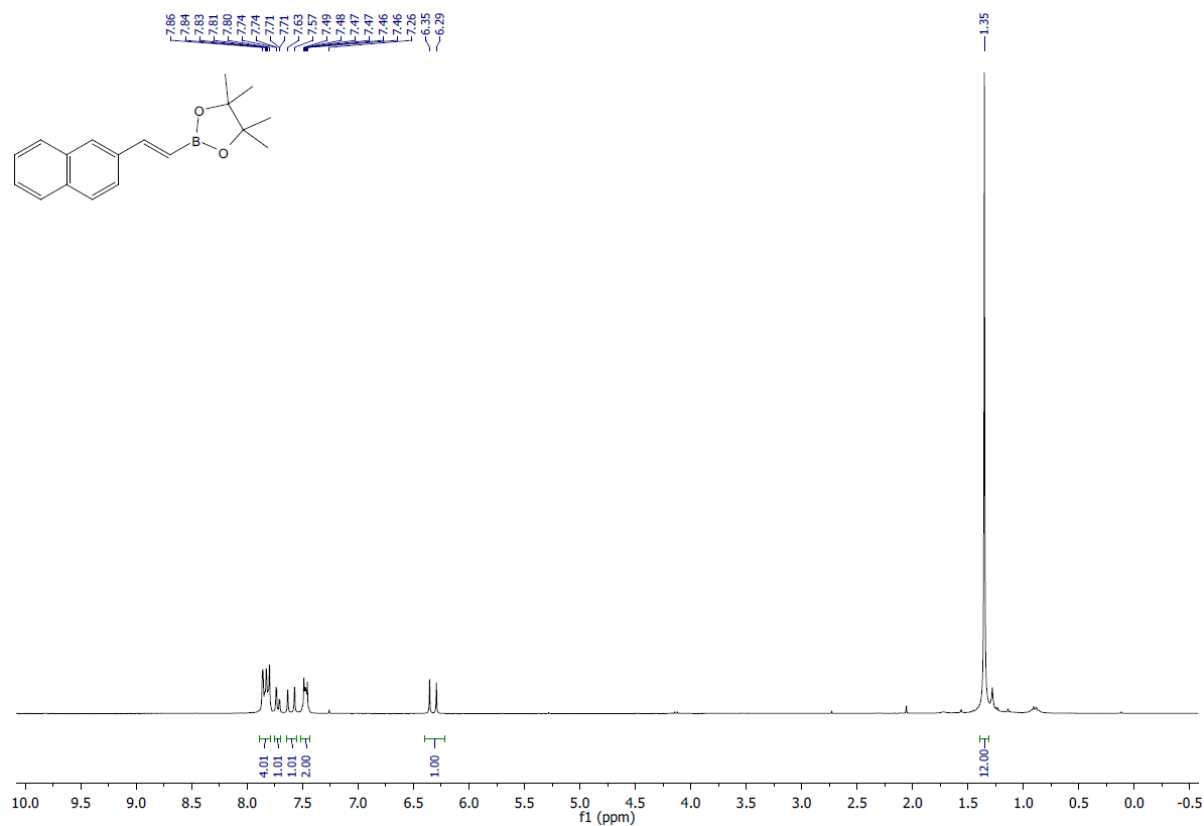

<sup>13</sup>C NMR (75 MHz, CDCl<sub>3</sub>)

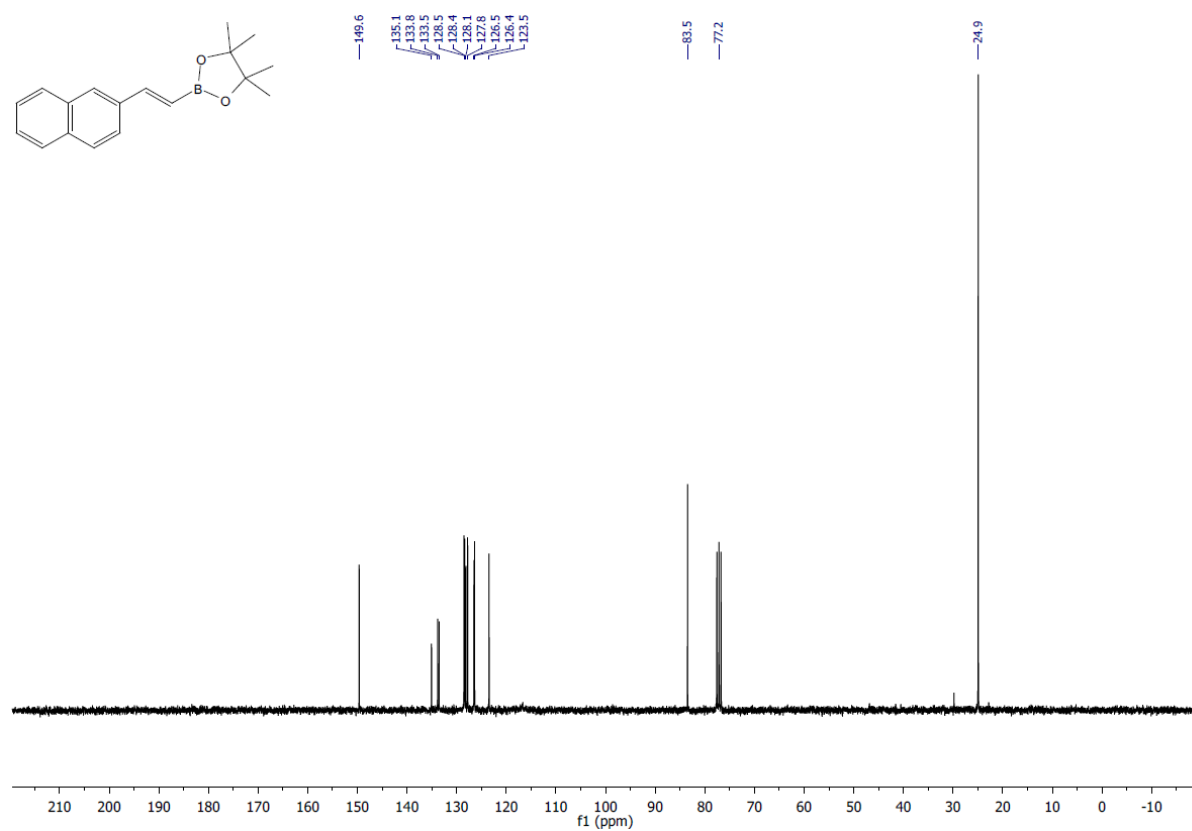

**(E)-2-(2-(6-methoxynaphthalen-2-yl)vinyl)-4,4,5,5-tetramethyl-1,3,2-dioxaborolane (24)**

<sup>1</sup>H NMR (300 MHz, CDCl<sub>3</sub>)

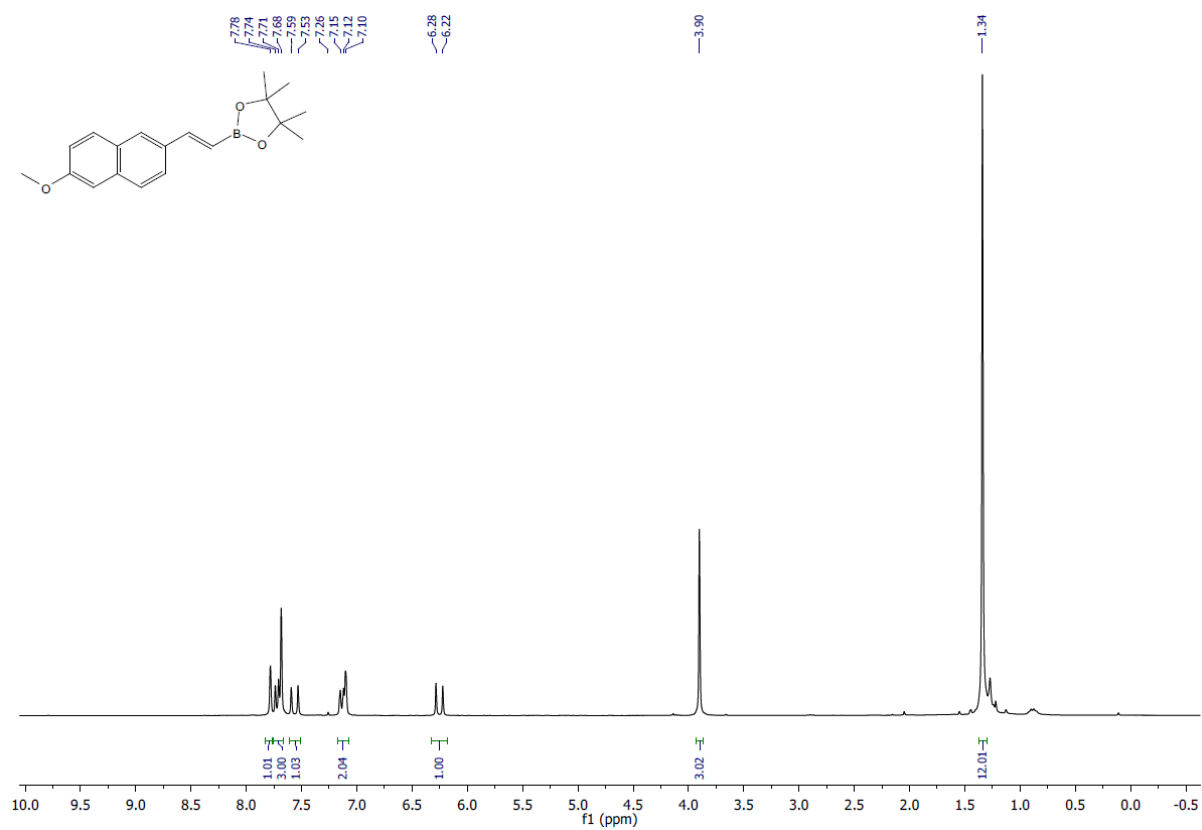

<sup>13</sup>C NMR (75 MHz, CDCl<sub>3</sub>)

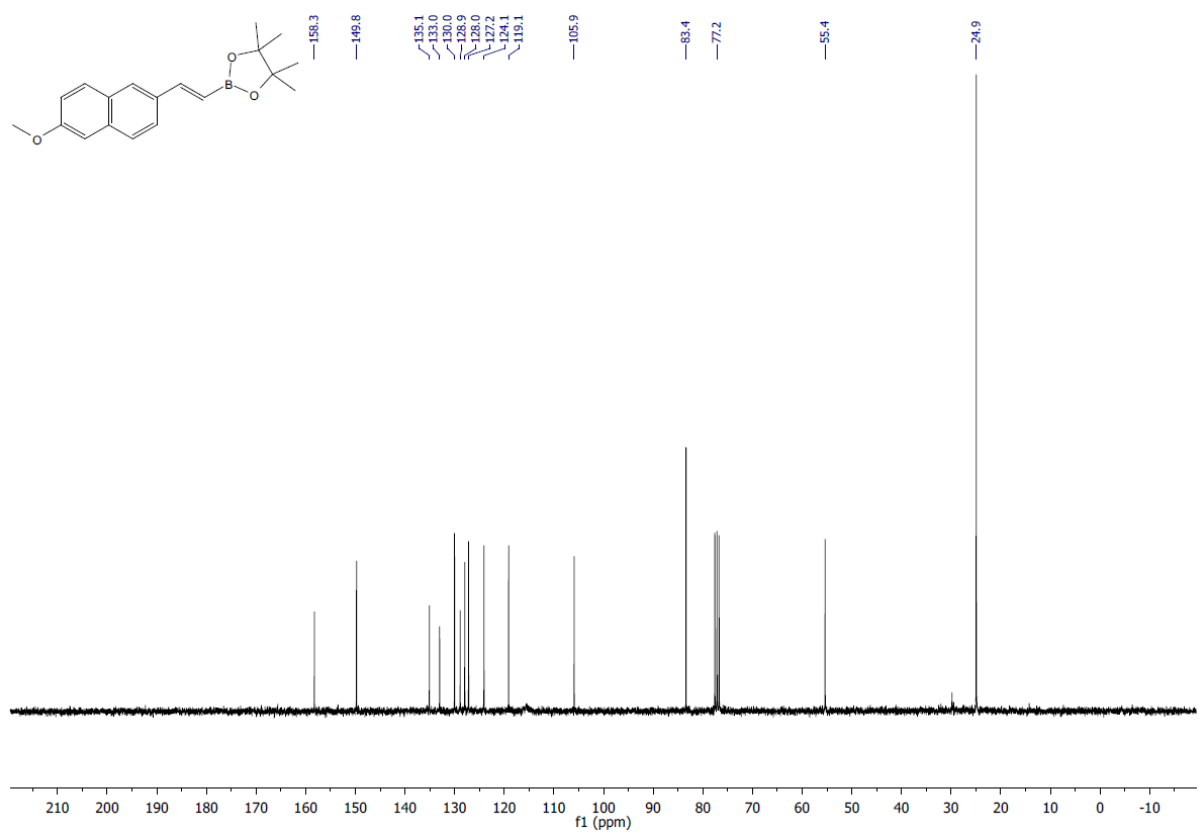

**(E)-3-(2-(4,4,5,5-tetramethyl-1,3,2-dioxaborolan-2-yl)vinyl)pyridine (25)**

<sup>1</sup>H NMR (300 MHz, CDCl<sub>3</sub>)

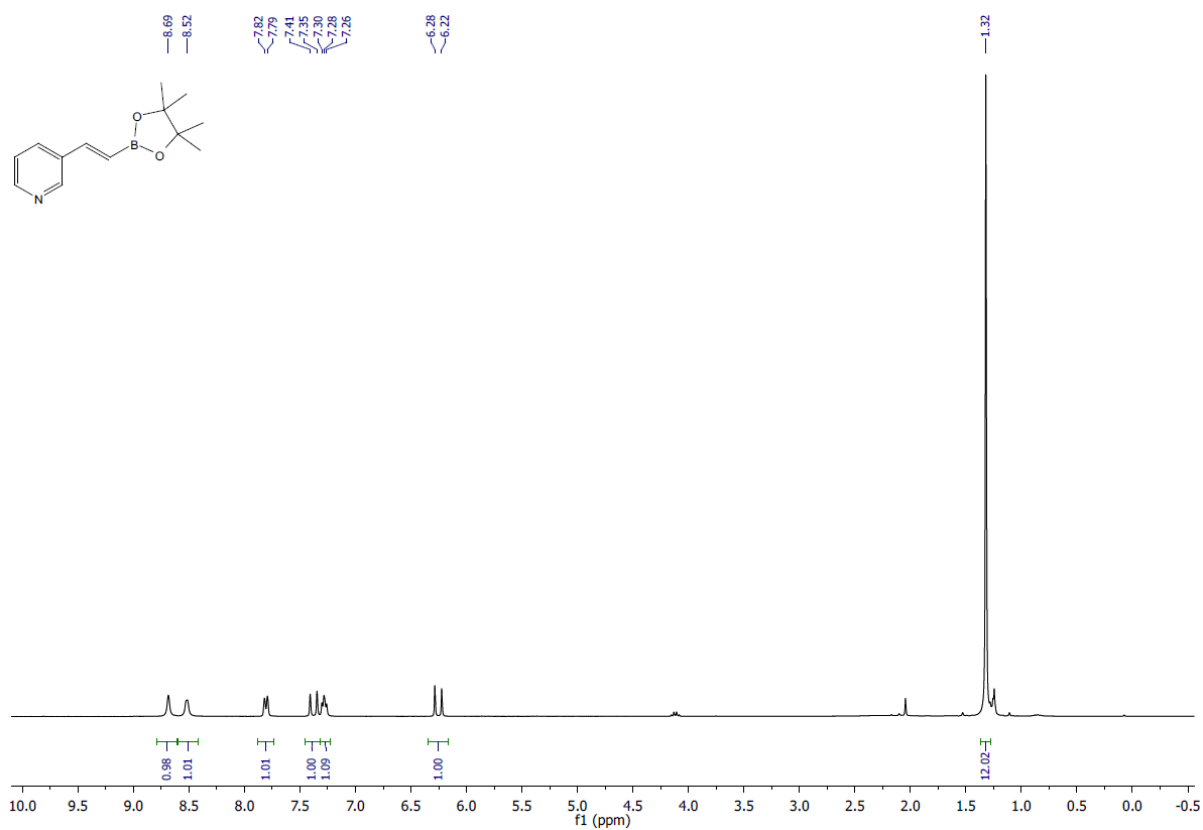

<sup>13</sup>C NMR (75 MHz, CDCl<sub>3</sub>)

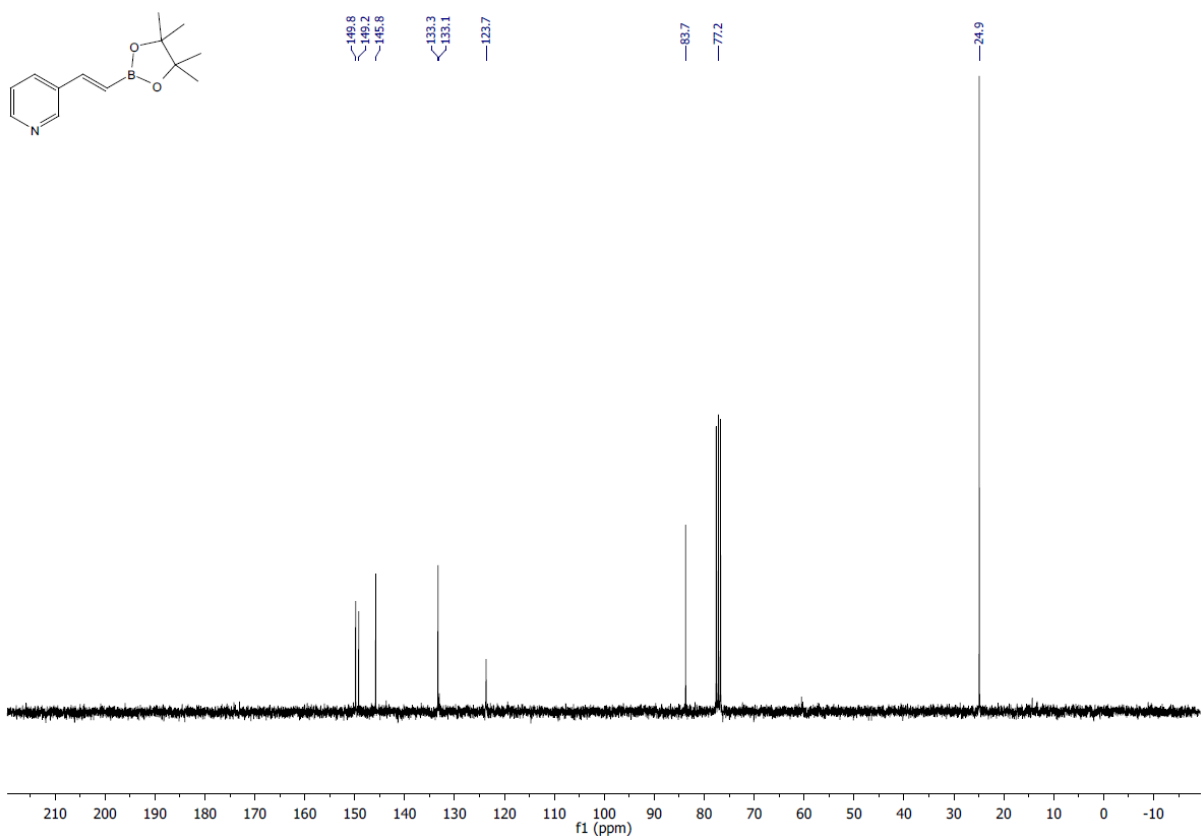

**(E)-4-(4,4,5,5-tetramethyl-1,3,2-dioxaborolan-2-yl)but-3-en-1-ol (26)**

<sup>1</sup>H NMR (300 MHz, CDCl<sub>3</sub>)

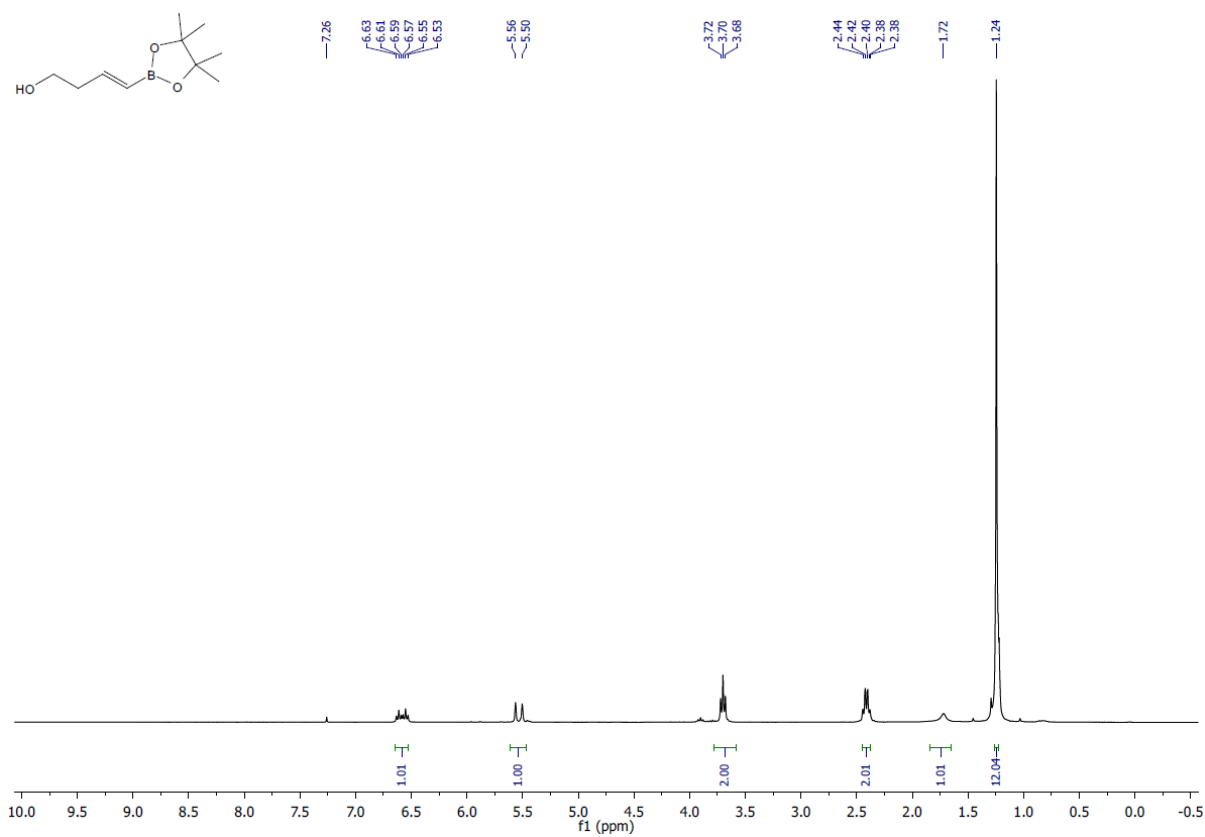

<sup>13</sup>C NMR (75 MHz, CDCl<sub>3</sub>)

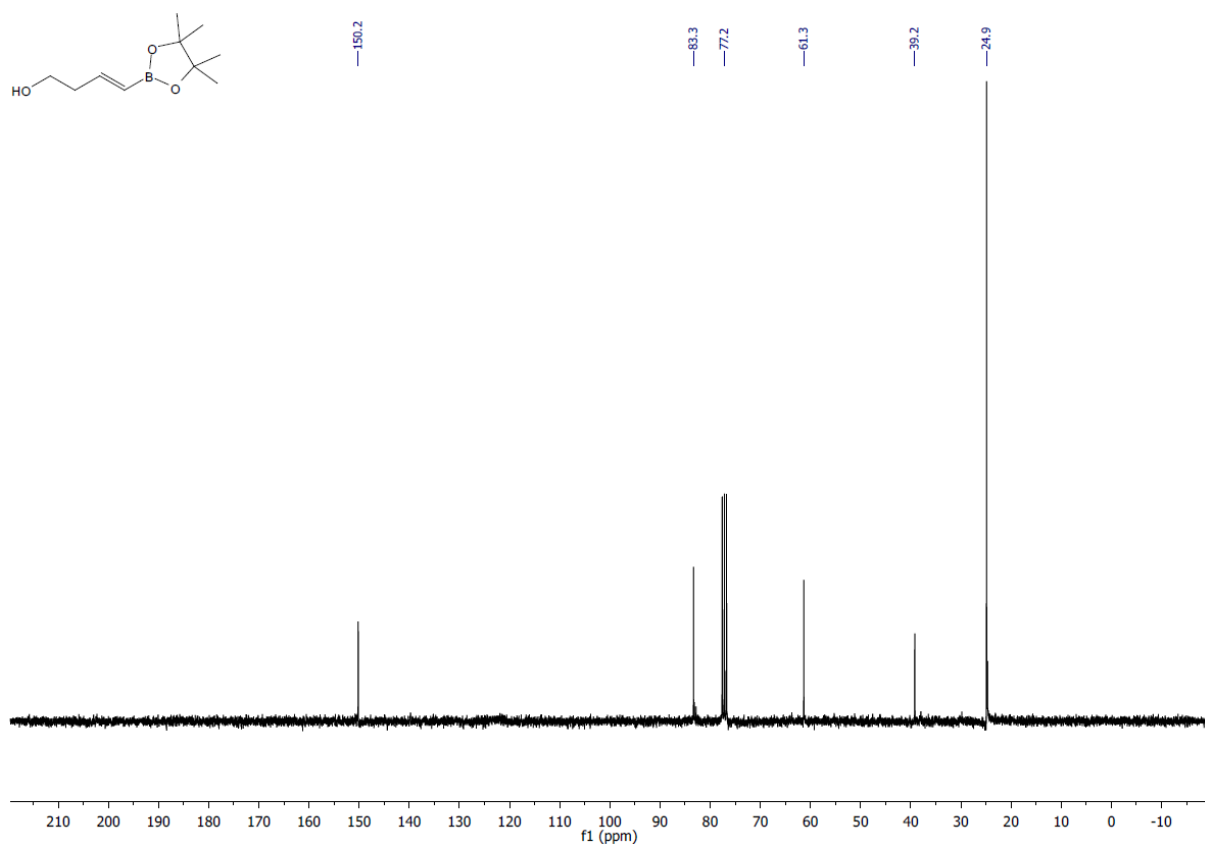

**(E)-1-phenyl-3-(4,4,5,5-tetramethyl-1,3,2-dioxaborolan-2-yl)prop-2-en-1-ol (27)**

<sup>1</sup>H NMR (300 MHz, CDCl<sub>3</sub>)

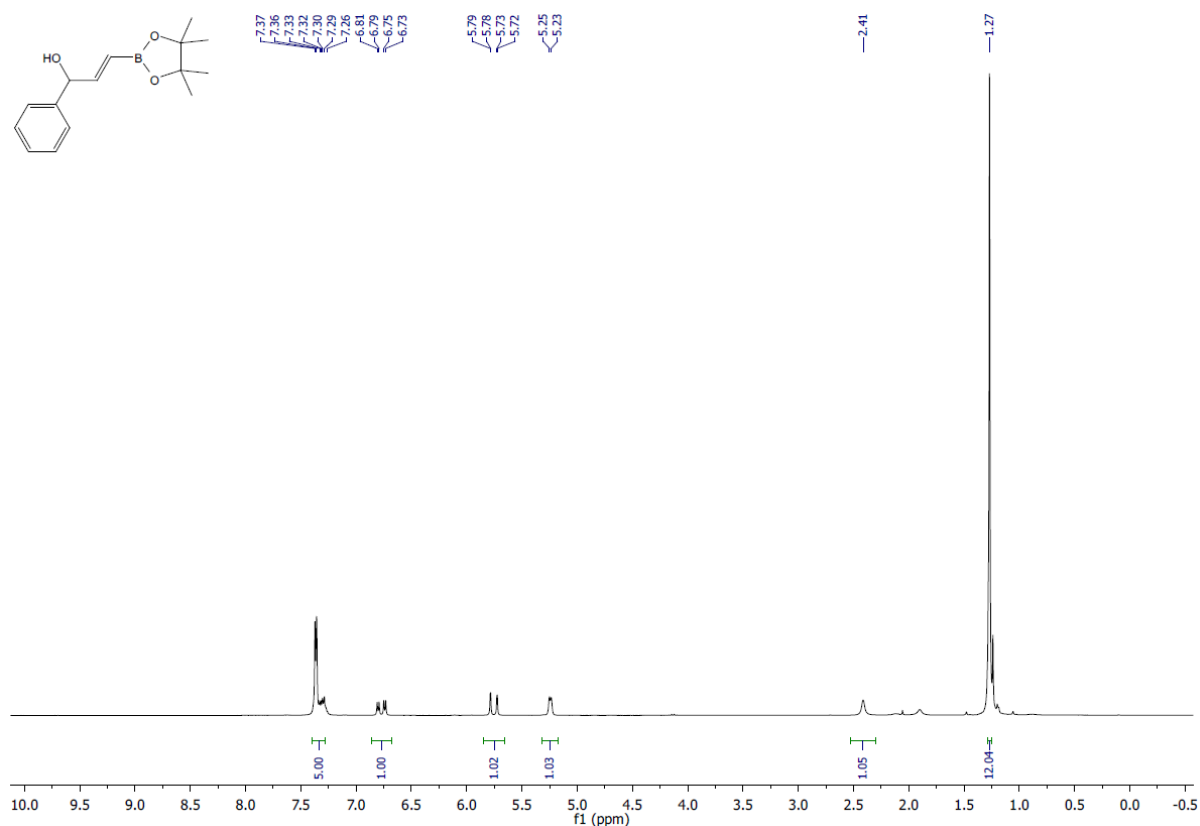

<sup>13</sup>C NMR (75 MHz, CDCl<sub>3</sub>)

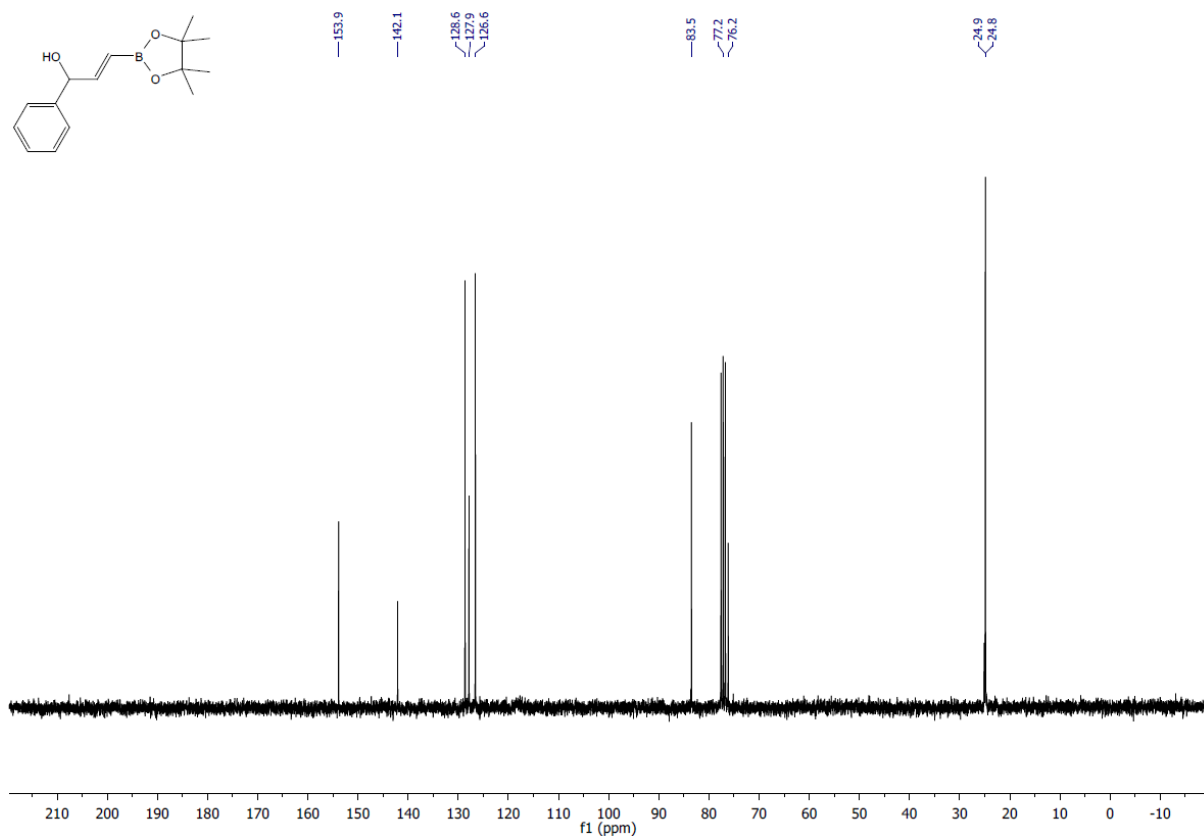

**(E)-1,1-diphenyl-3-(4,4,5,5-tetramethyl-1,3,2-dioxaborolan-2-yl)prop-2-en-1-ol (28)**

<sup>1</sup>H NMR (300 MHz, C<sub>6</sub>D<sub>6</sub>)

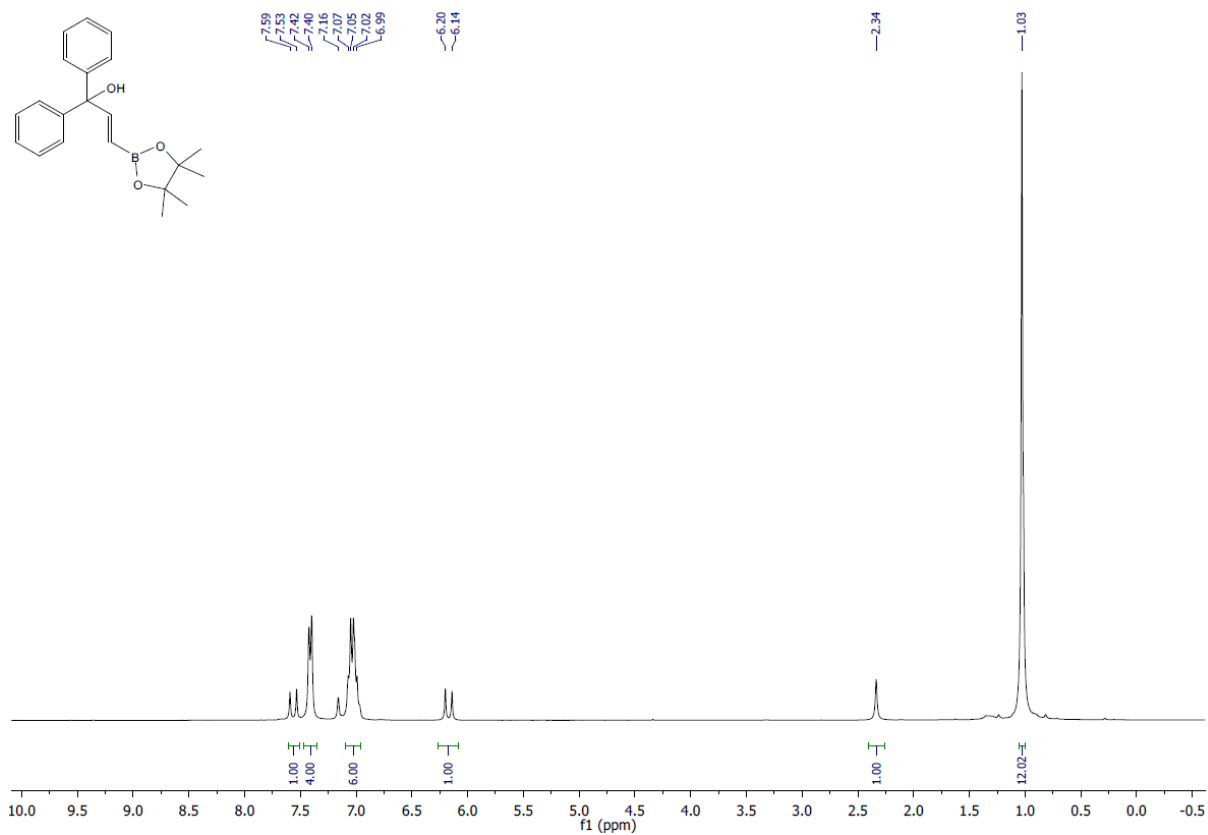

<sup>13</sup>C NMR (75 MHz, C<sub>6</sub>D<sub>6</sub>)

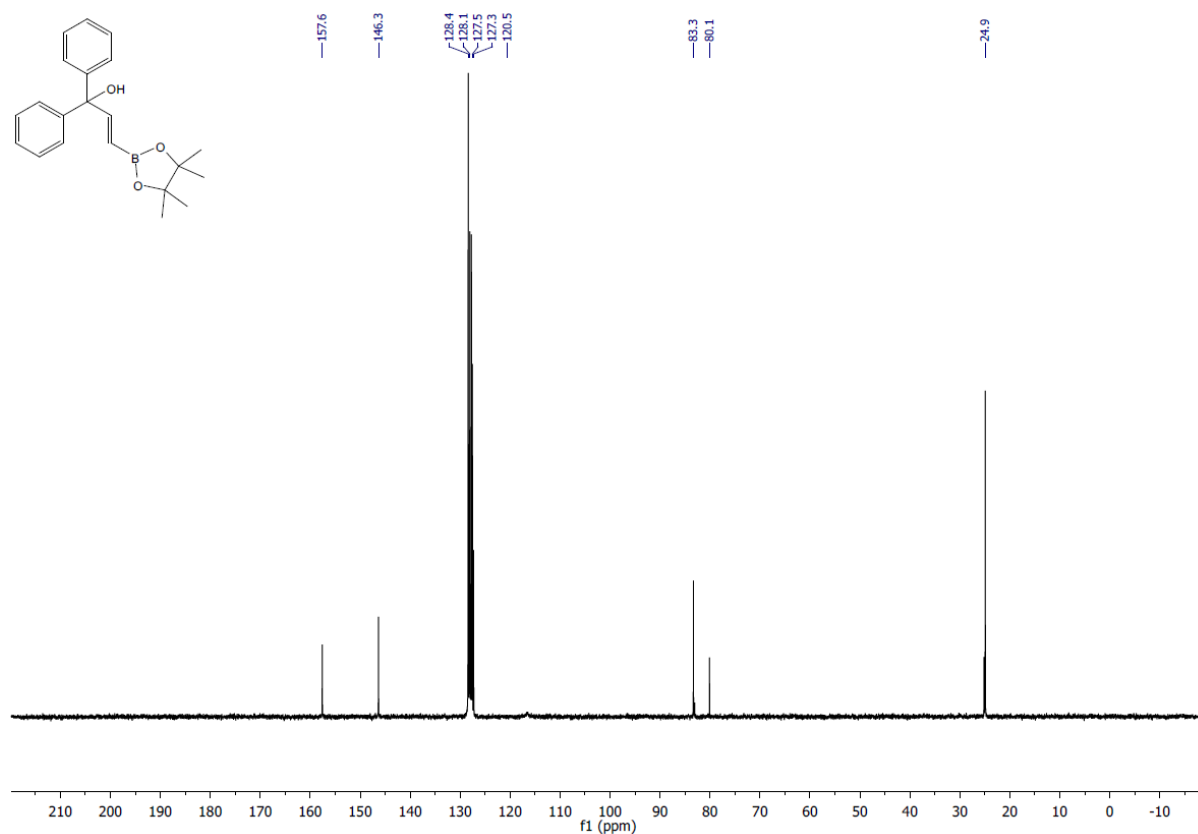

**(E)-9-(2-(4,4,5,5-tetramethyl-1,3,2-dioxaborolan-2-yl)vinyl)-9H-fluoren-9-ol (29)**

<sup>1</sup>H NMR (300 MHz, CDCl<sub>3</sub>)

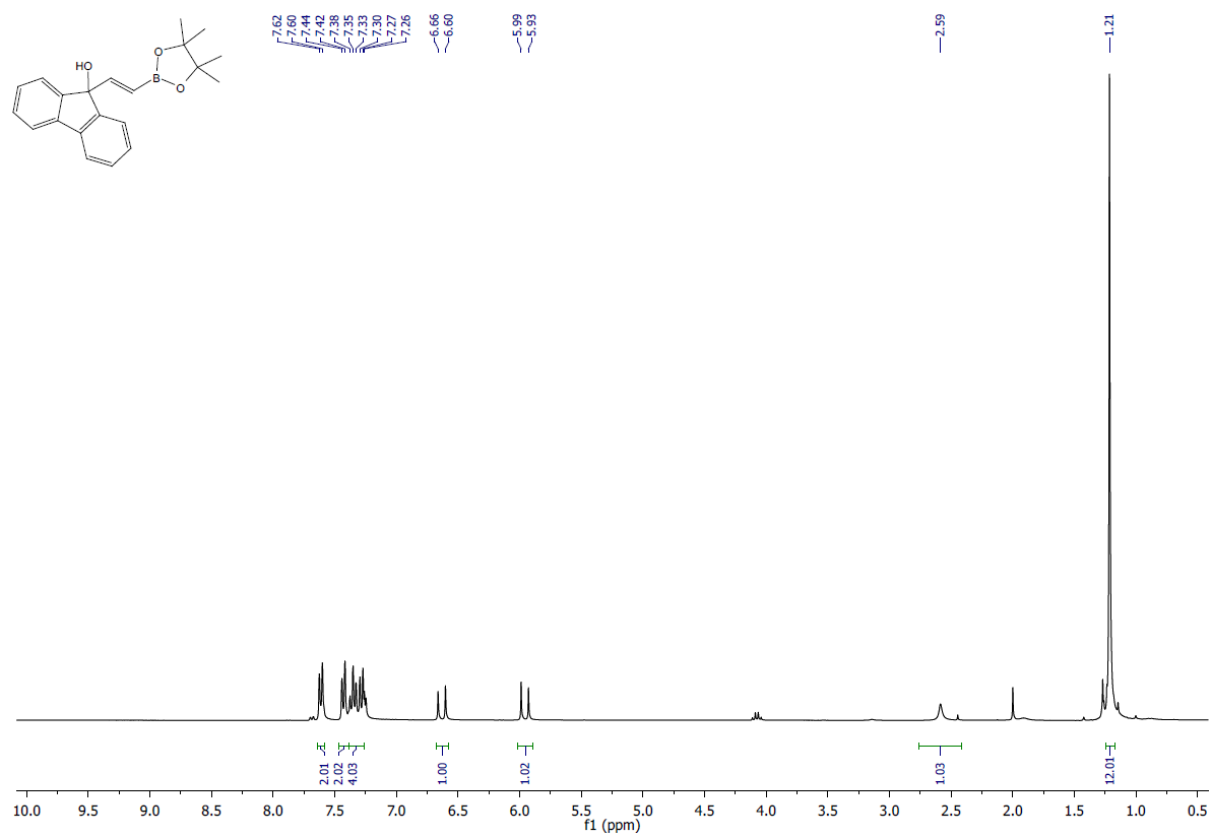

<sup>13</sup>C NMR (75 MHz, CDCl<sub>3</sub>)

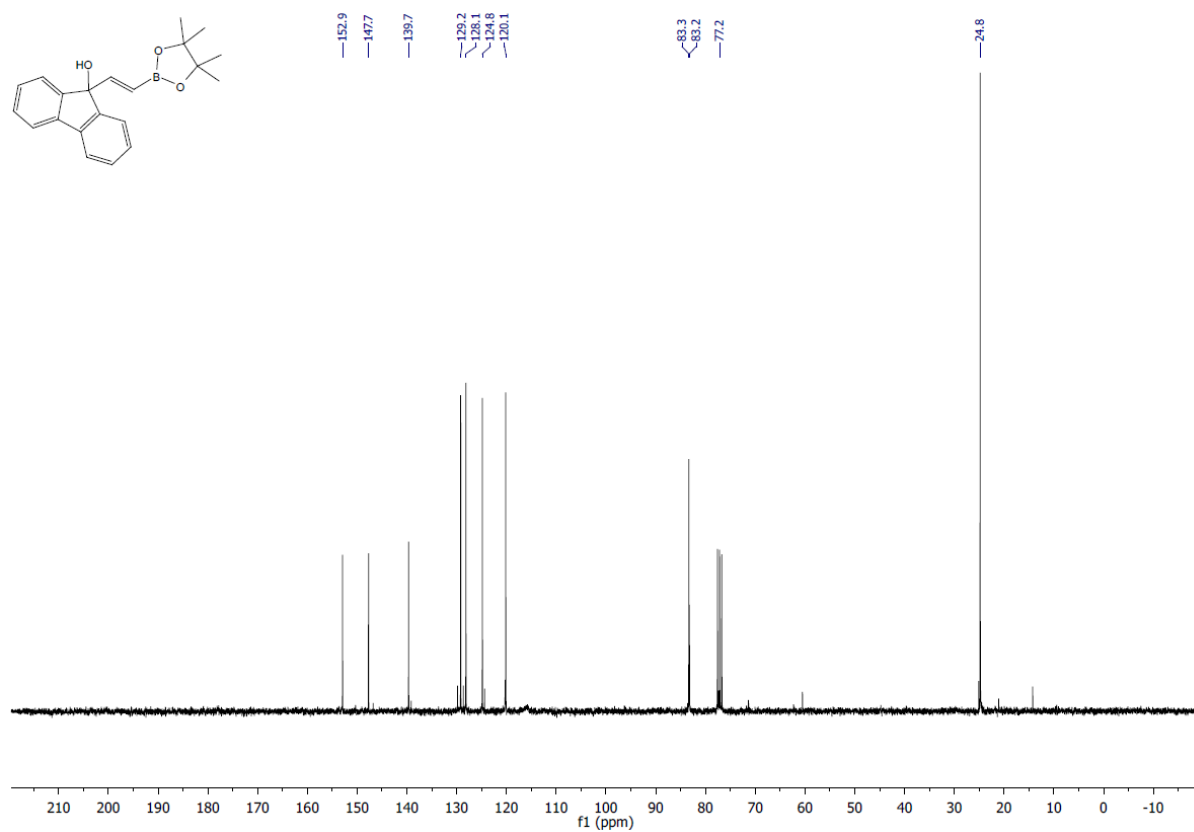



**(E)-2,8-dimethyl-5-(2-(4,4,5,5-tetramethyl-1,3,2-dioxaborolan-2-yl)vinyl)nonan-5-ol (30)**

<sup>1</sup>H NMR (300 MHz, CDCl<sub>3</sub>)

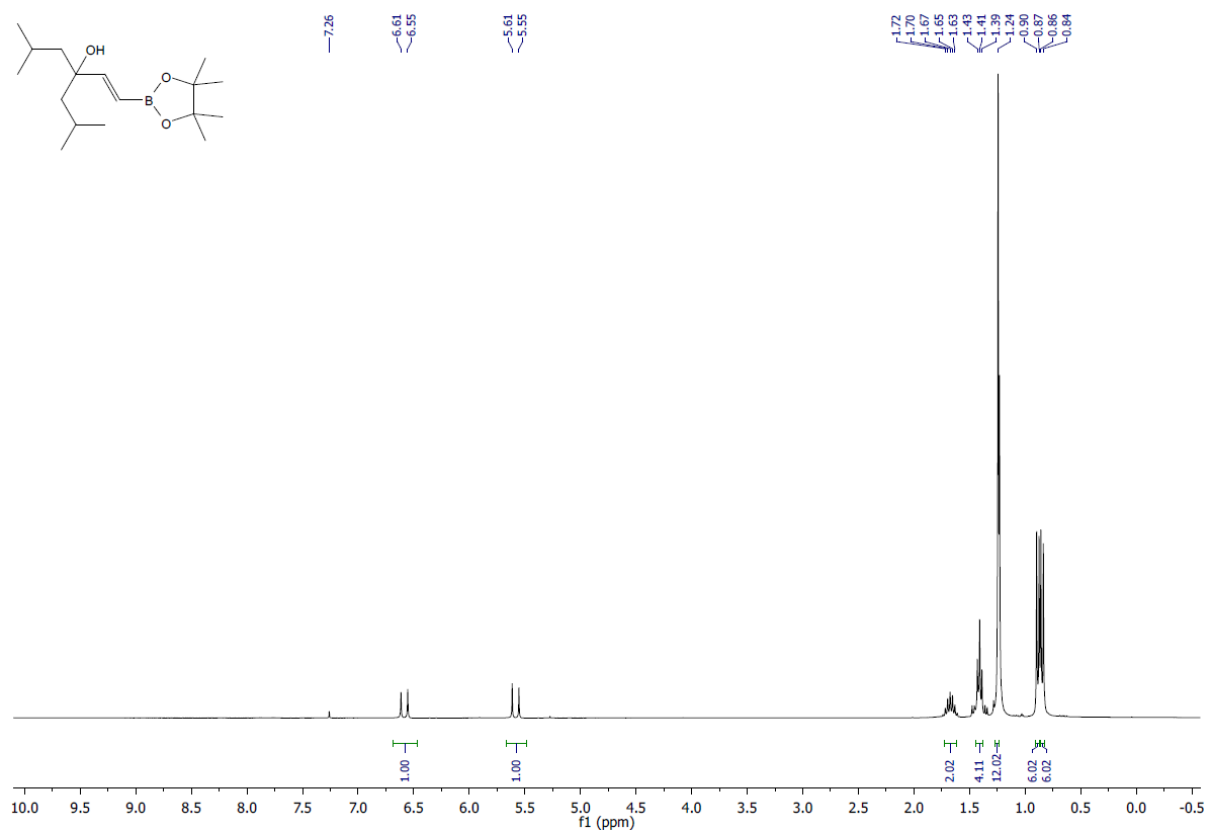

<sup>13</sup>C NMR (75 MHz, CDCl<sub>3</sub>)

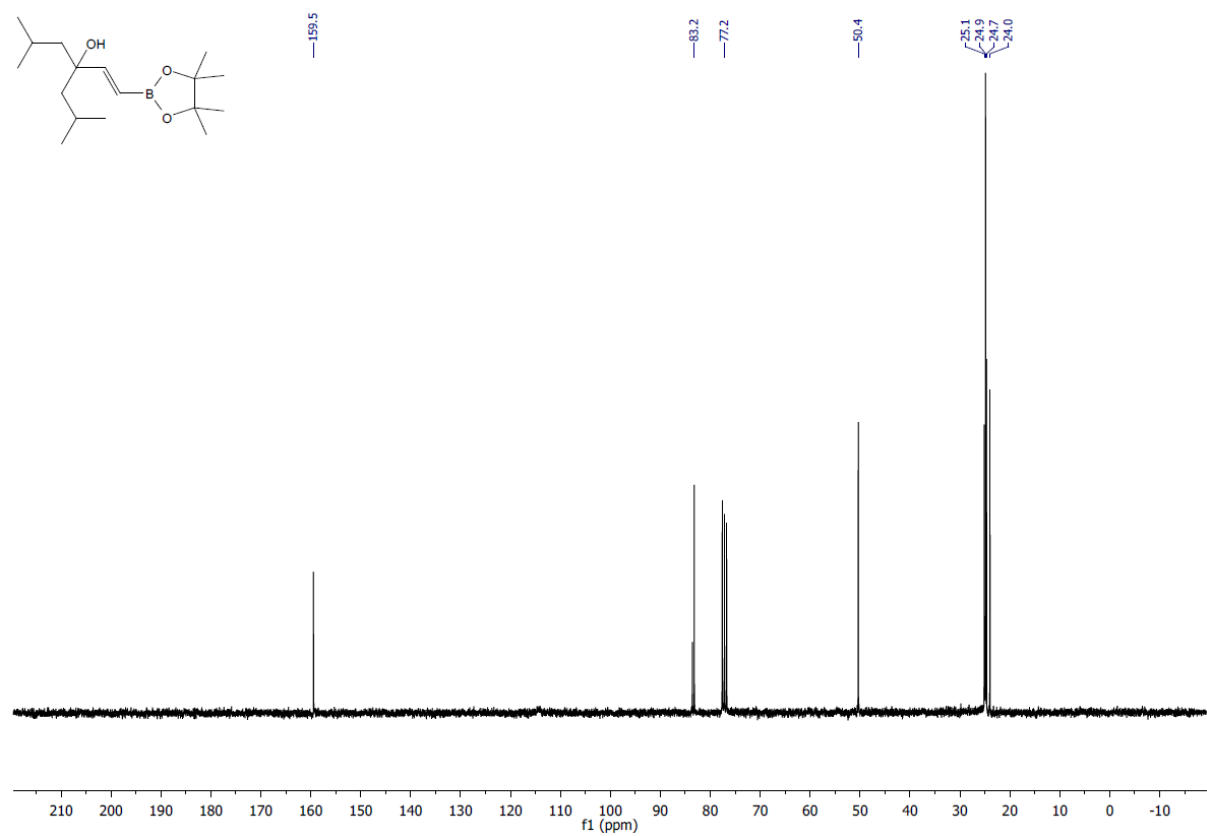

**(E)-2-(3-(4,4,5,5-tetramethyl-1,3,2-dioxaborolan-2-yl)allyl)isoindoline-1,3-dione (31)**

<sup>1</sup>H NMR (300 MHz, CDCl<sub>3</sub>)

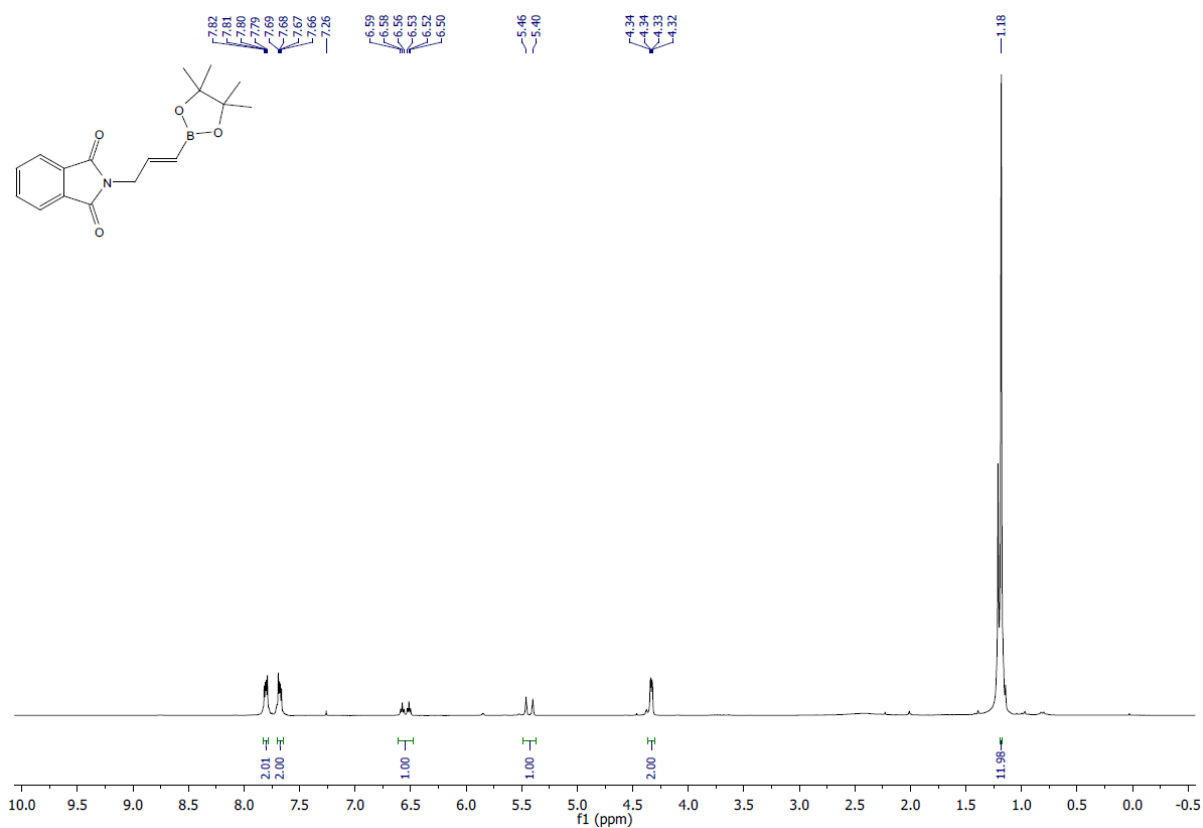

<sup>13</sup>C NMR (75 MHz, CDCl<sub>3</sub>)

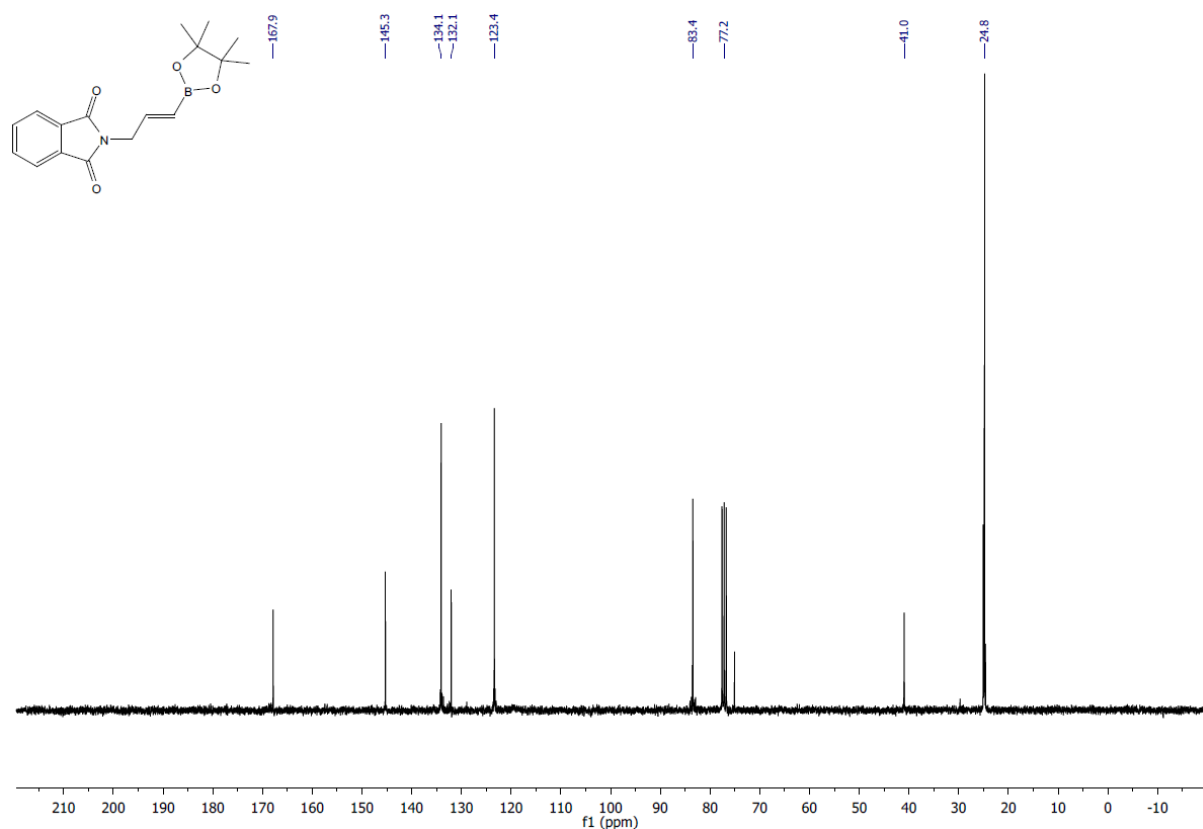

**(E)-2-(2-(cyclohex-1-en-1-yl)vinyl)-4,4,5,5-tetramethyl-1,3,2-dioxaborolane (32)**

<sup>1</sup>H NMR (300 MHz, CDCl<sub>3</sub>)

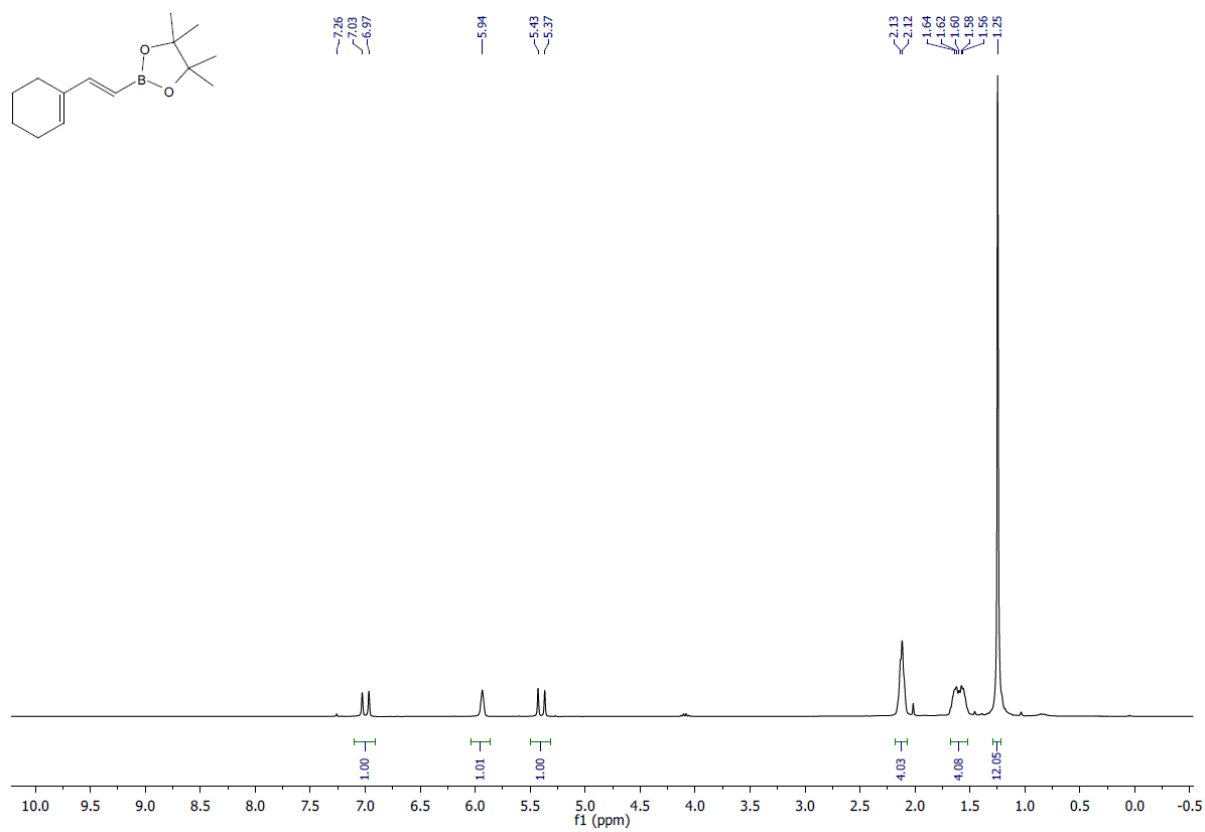

<sup>13</sup>C NMR (75 MHz, CDCl<sub>3</sub>)

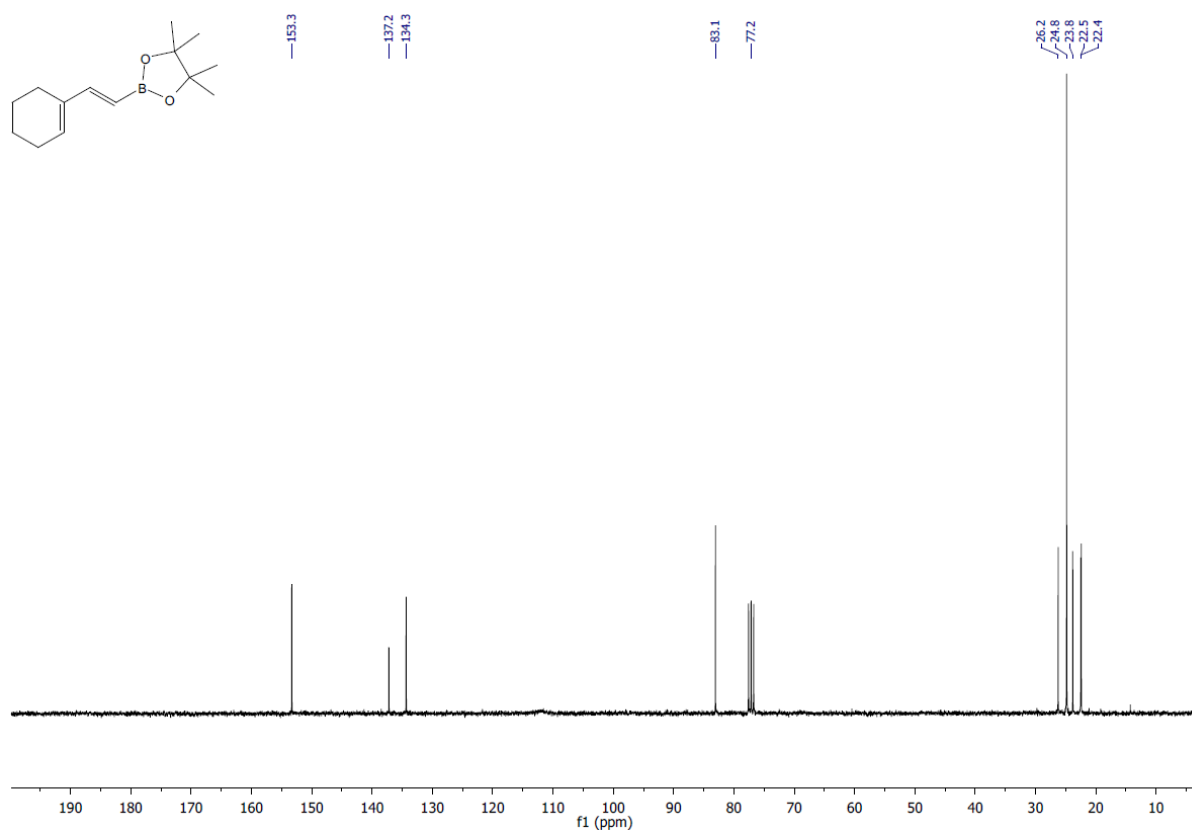

### (E)-2-(2-cyclopropylvinyl)-4,4,5,5-tetramethyl-1,3,2-dioxaborolane (33)

$^1\text{H}$  NMR (300 MHz,  $\text{CDCl}_3$ )

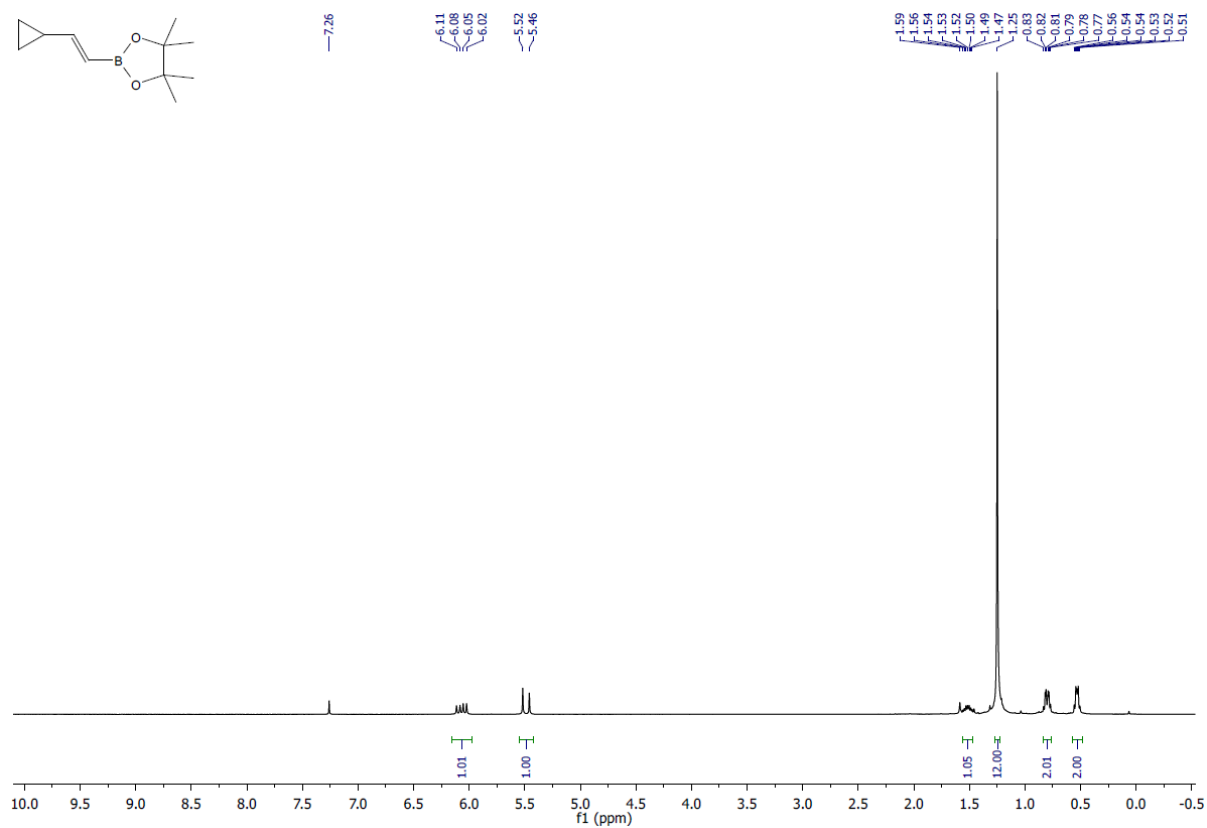

$^{13}\text{C}$  NMR (75 MHz,  $\text{CDCl}_3$ )

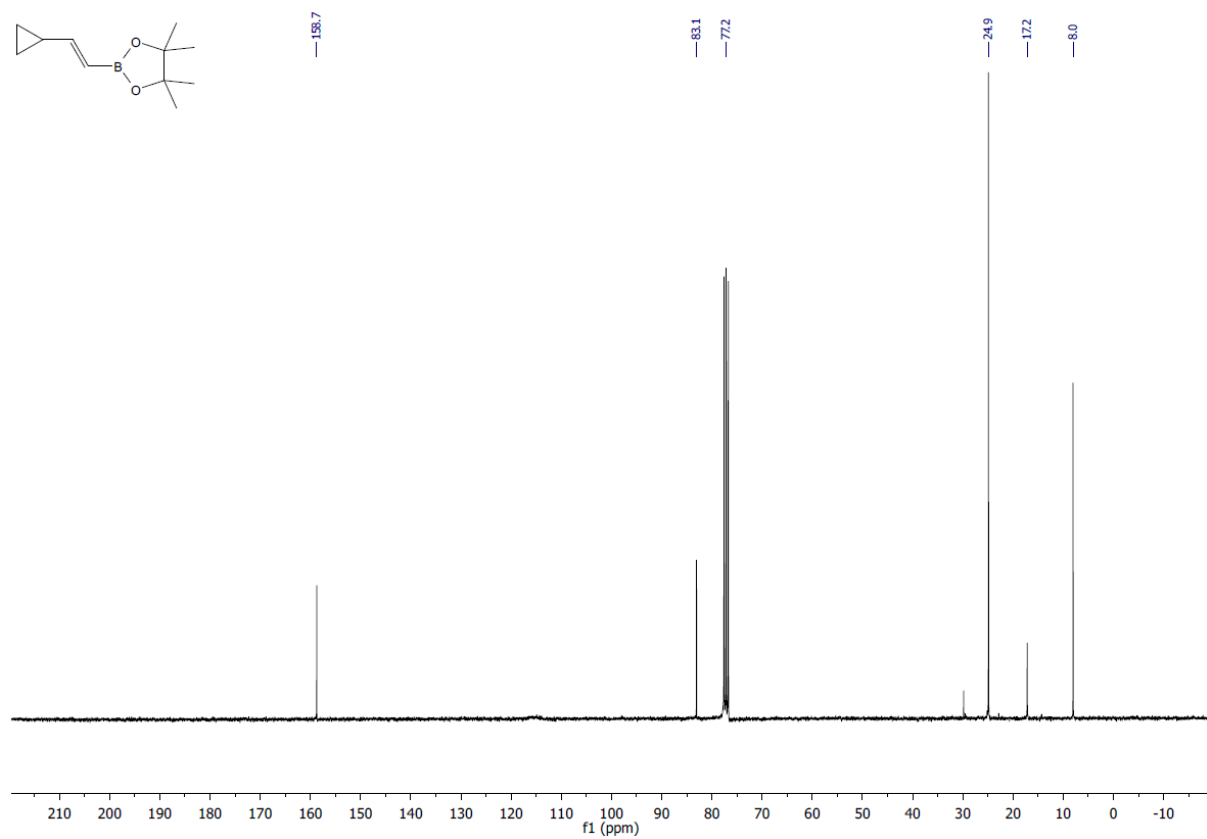

**(E)-4,4,5,5-tetramethyl-2-(3-phenylprop-1-en-1-yl)-1,3,2-dioxaborolane & 4,4,5,5-tetramethyl-2-(3-phenylprop-1-en-2-yl)-1,3,2-dioxaborolane (34)**

<sup>1</sup>H NMR (300 MHz, CDCl<sub>3</sub>)

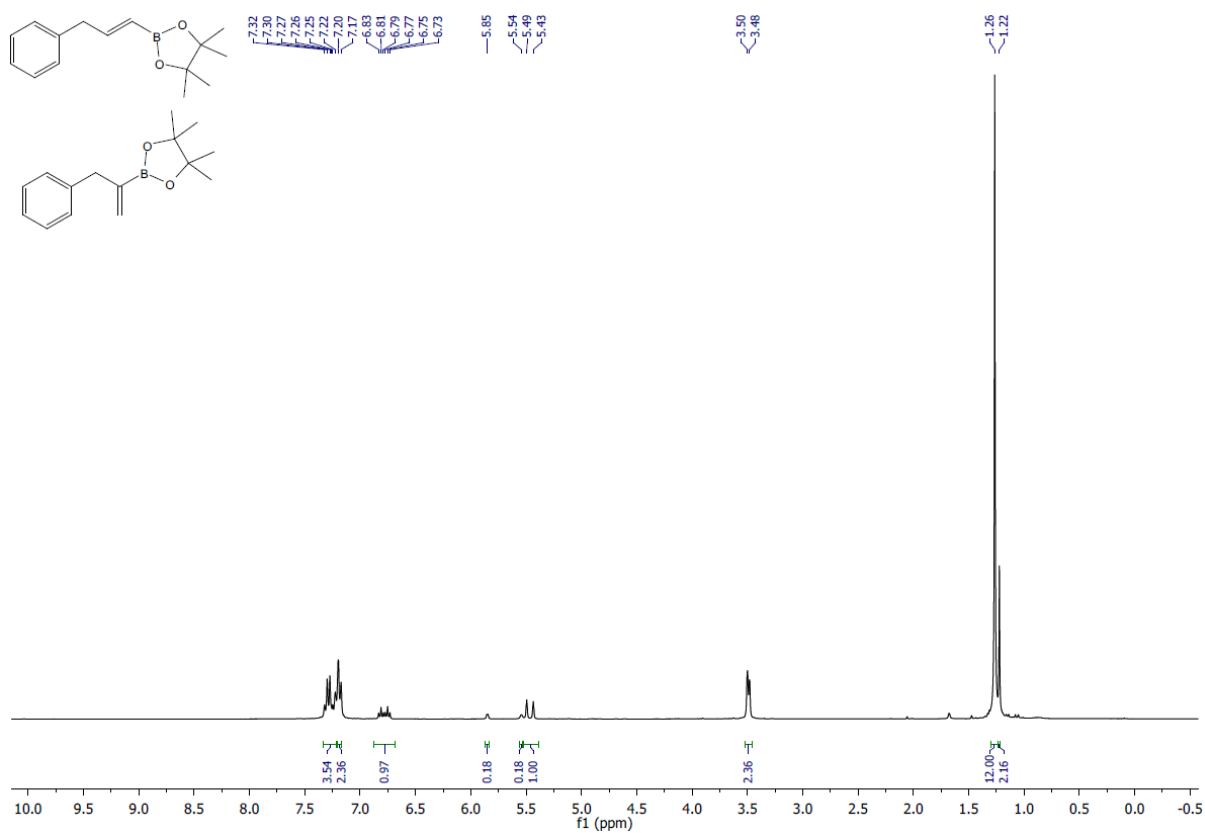

<sup>13</sup>C NMR (75 MHz, CDCl<sub>3</sub>)

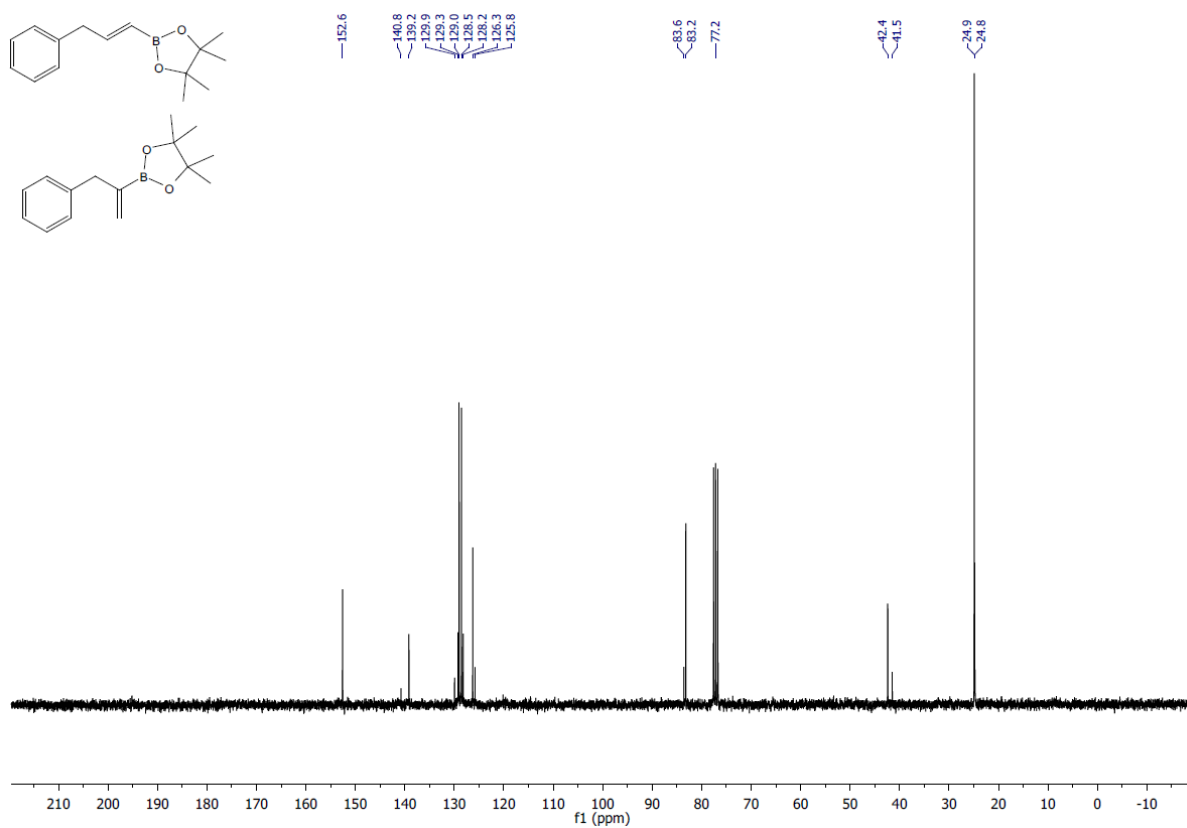

**(E)-2-(2-cyclohexylvinyl)-4,4,5,5-tetramethyl-1,3,2-dioxaborolane & 2-(1-cyclohexyl vinyl)-4,4,5,5-tetramethyl-1,3,2-dioxaborolane (35)**

<sup>1</sup>H NMR (300 MHz, CDCl<sub>3</sub>)

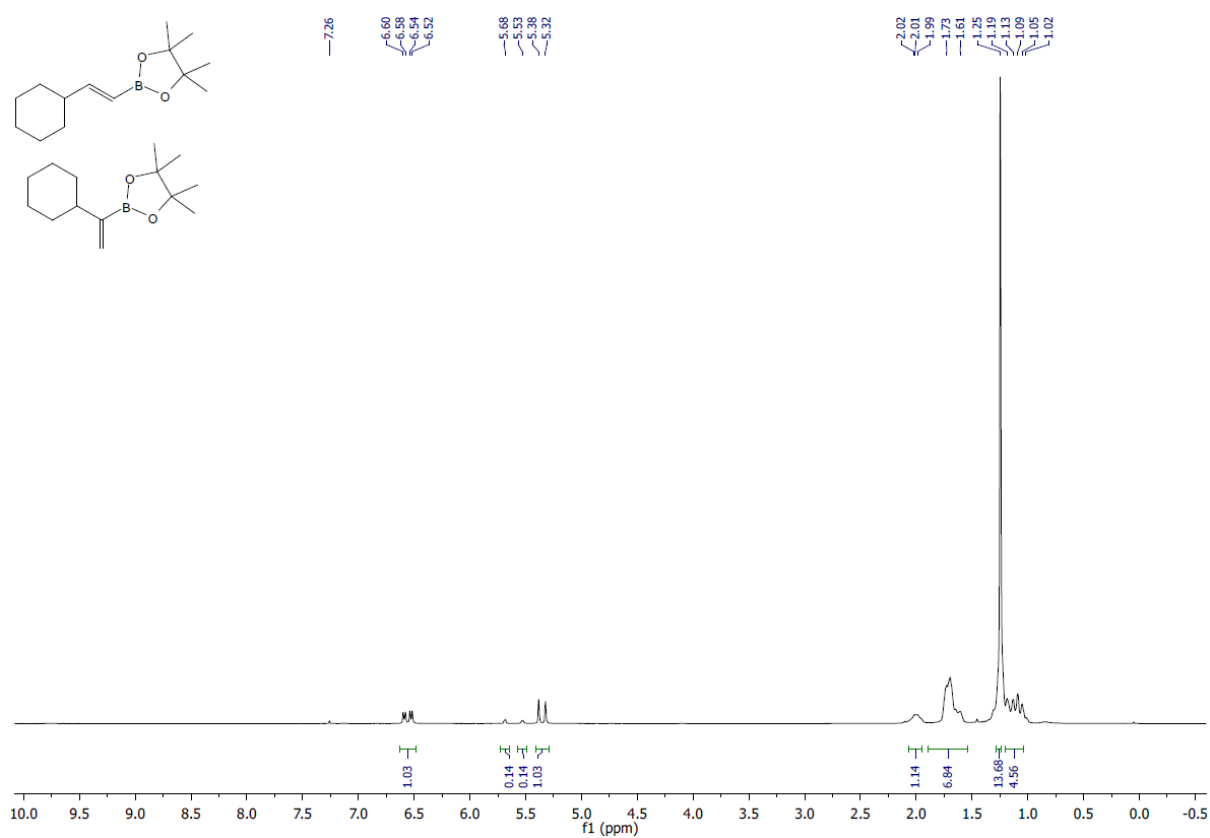

<sup>13</sup>C NMR (75 MHz, CDCl<sub>3</sub>)

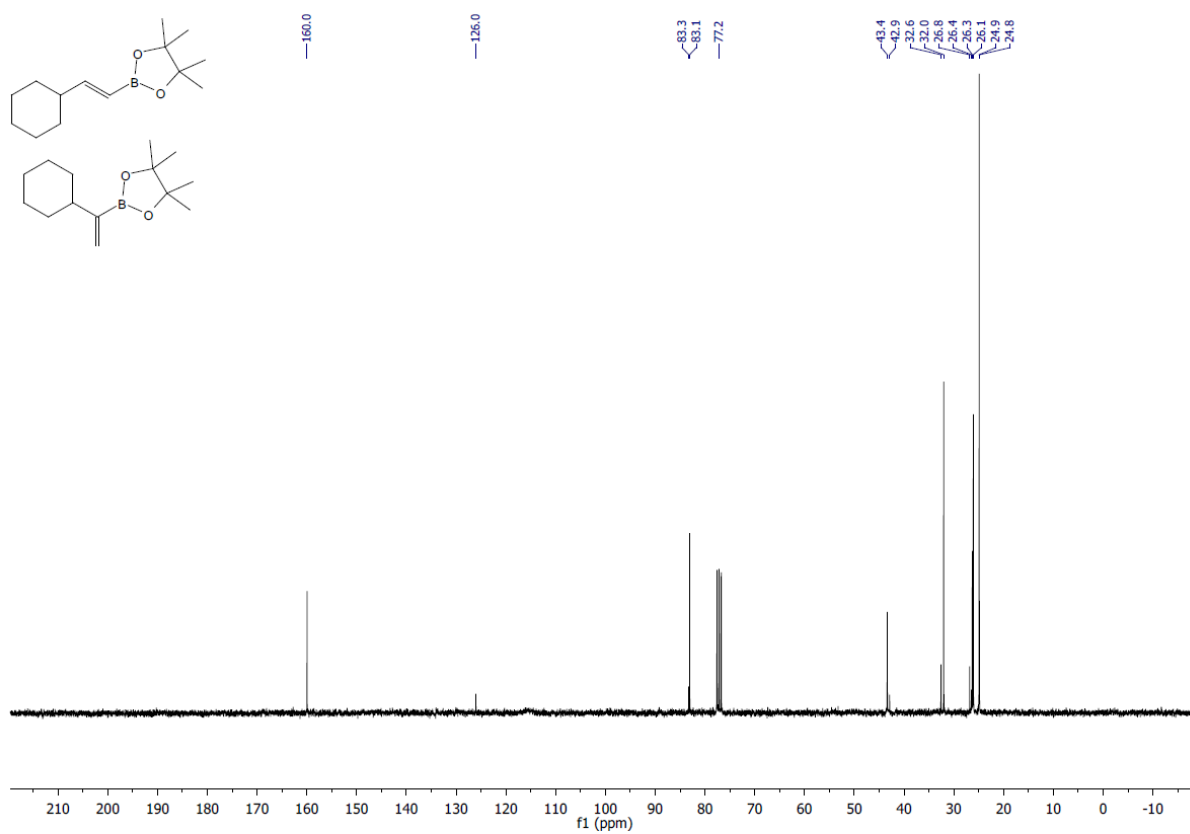

**(E)-2-(2-cyclopentylvinyl)-4,4,5,5-tetramethyl-1,3,2-dioxaborolane & 2-(1-cyclopentyl vinyl)-4,4,5,5-tetramethyl-1,3,2-dioxaborolane (36)**

<sup>1</sup>H NMR (300 MHz, CDCl<sub>3</sub>)

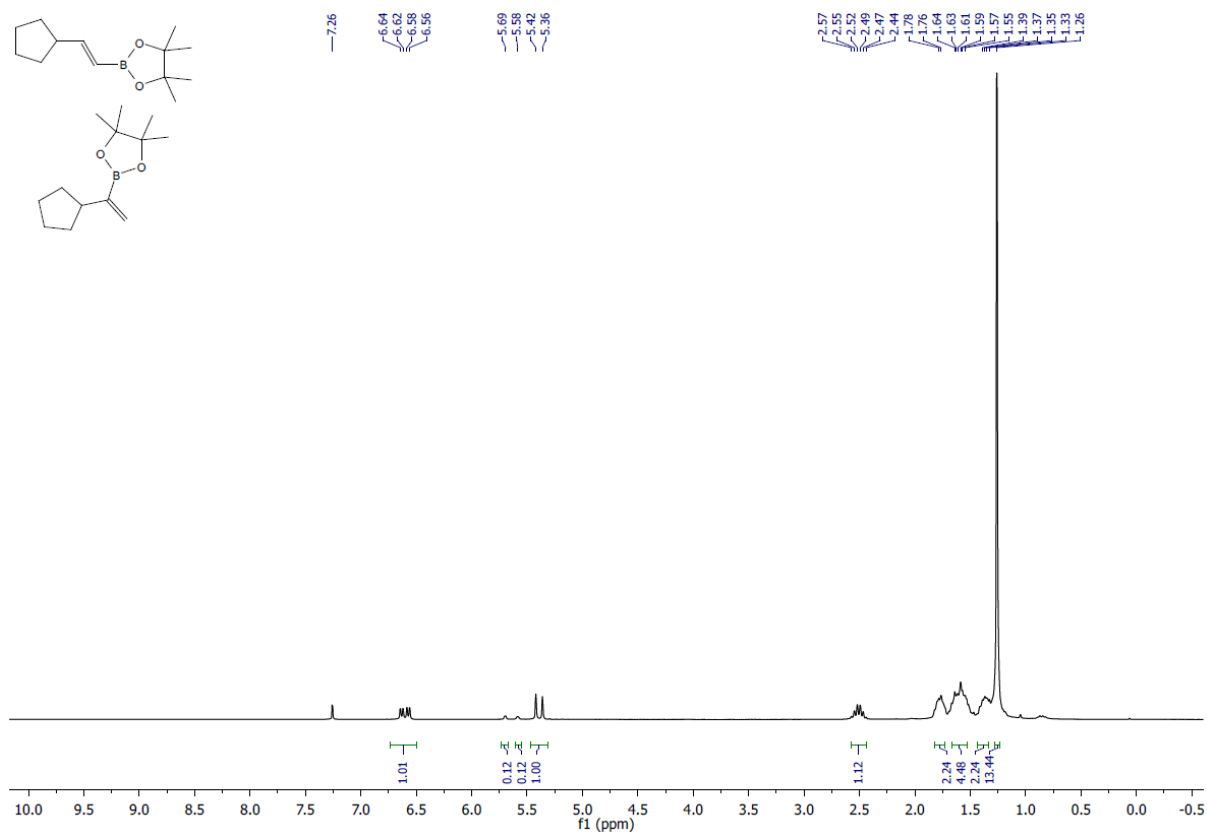

<sup>13</sup>C NMR (75 MHz, CDCl<sub>3</sub>)

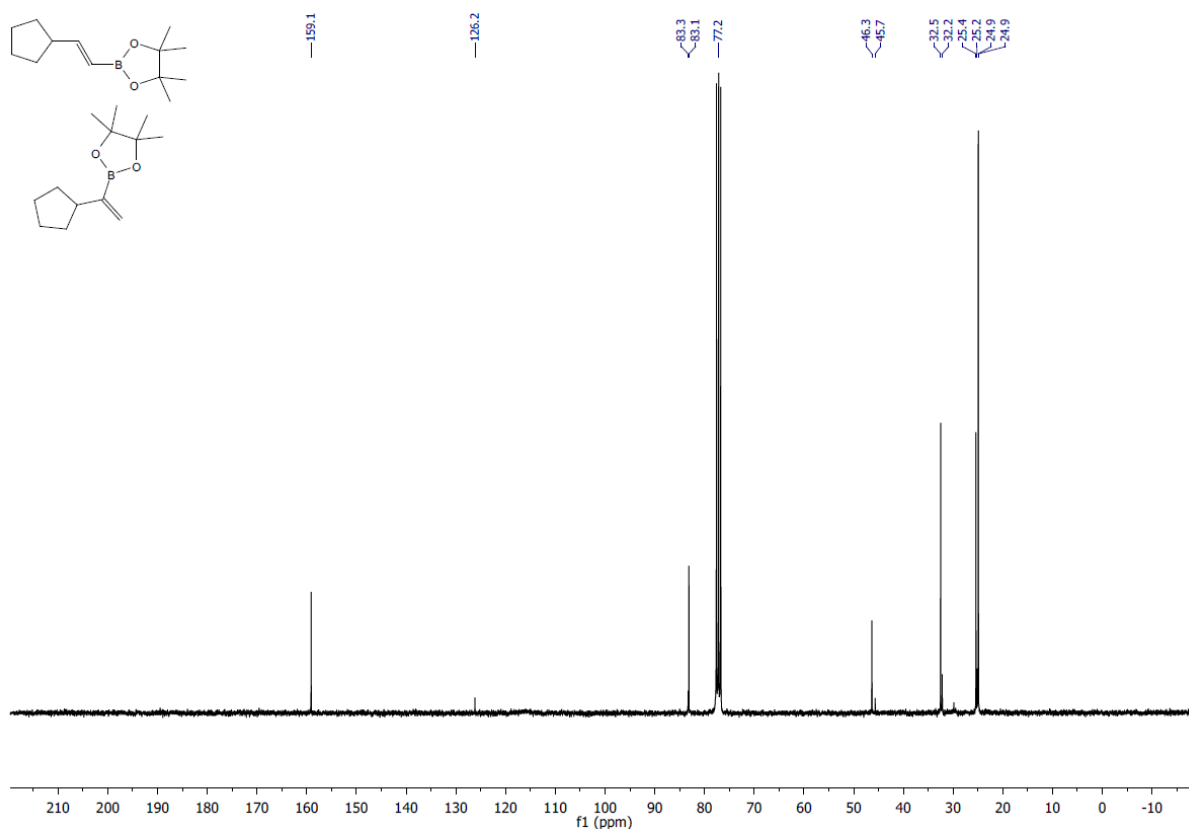

**(E)-2-(3-cyclohexylprop-1-en-1-yl)-4,4,5,5-tetramethyl-1,3,2-dioxaborolane & 2-(3-cyclohexylprop-1-en-2-yl)-4,4,5,5-tetramethyl-1,3,2-dioxaborolane (37)**

<sup>1</sup>H NMR (300 MHz, CDCl<sub>3</sub>)

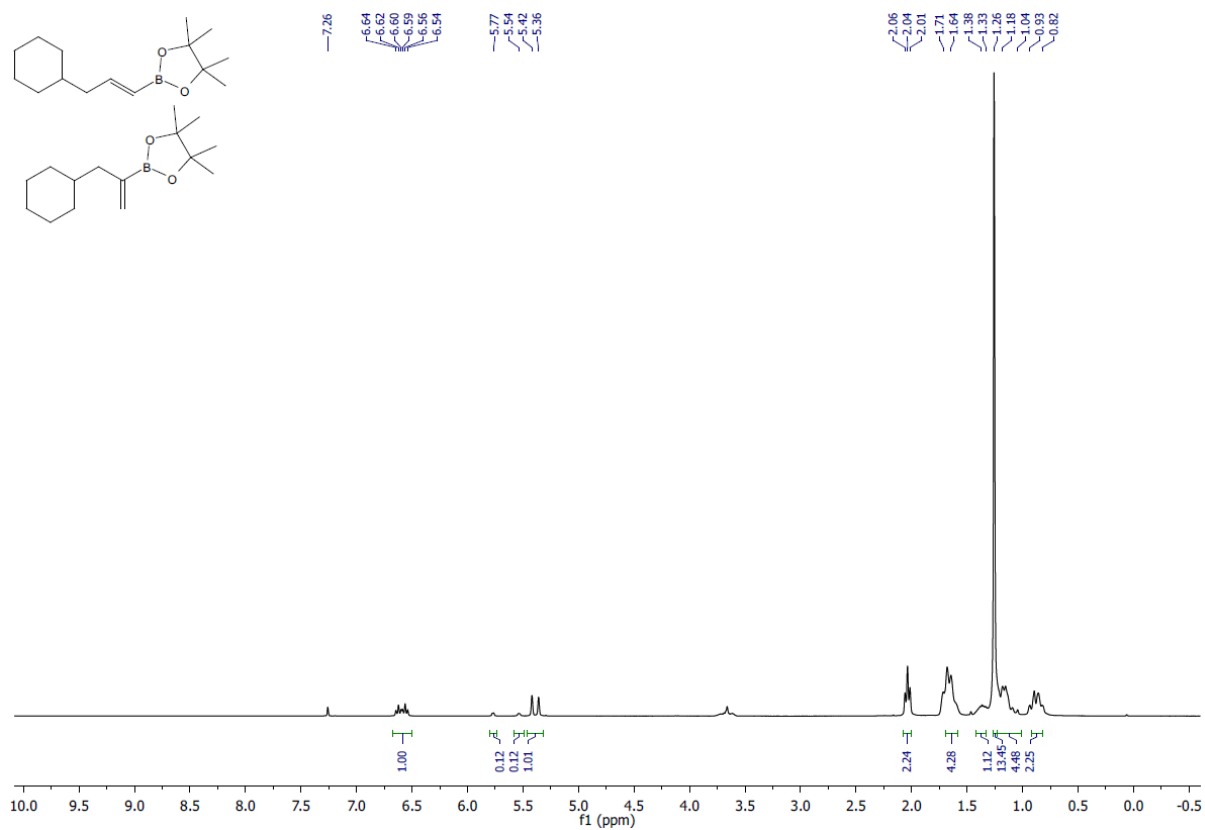

<sup>13</sup>C NMR (75 MHz, CDCl<sub>3</sub>)

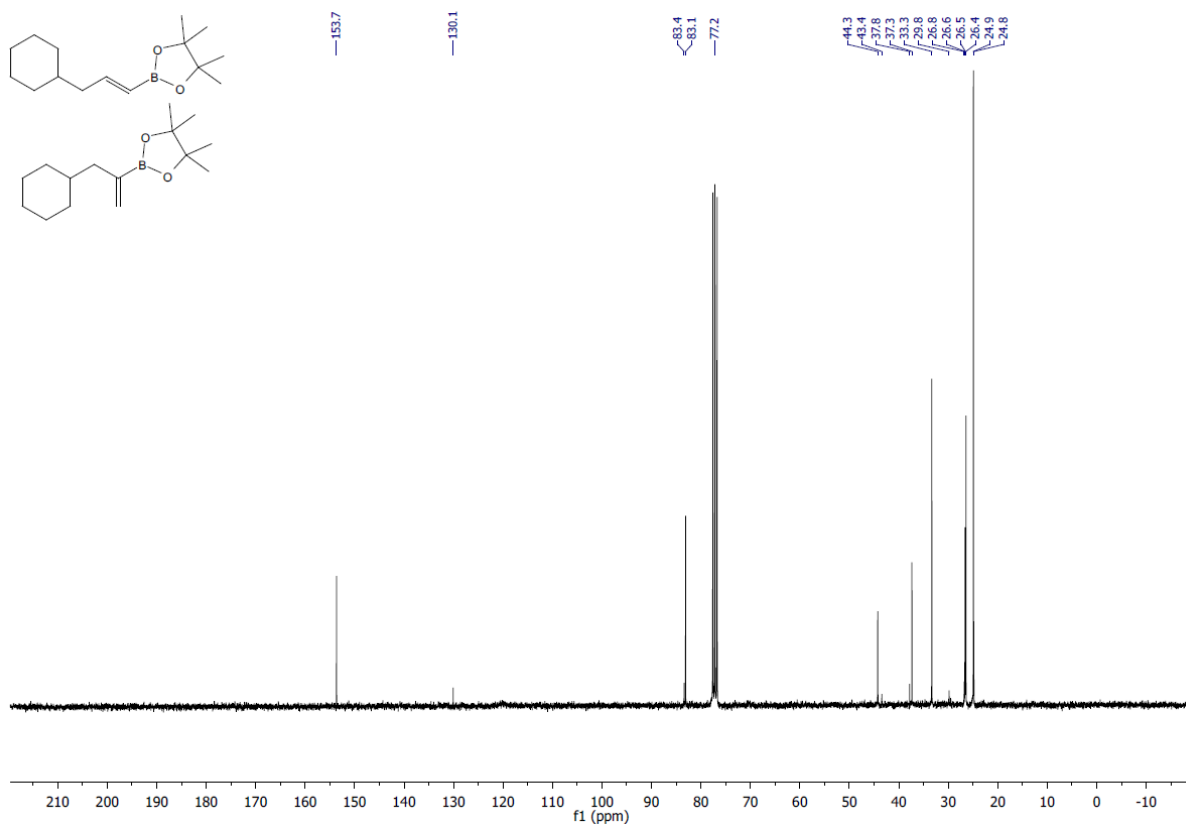



**(E)-2-(hept-1-en-1-yl)-4,4,5,5-tetramethyl-1,3,2-dioxaborolane & 2-(hept-1-en-2-yl)-4,4,5,5-tetramethyl-1,3,2-dioxaborolane (38)**

<sup>1</sup>H NMR (300 MHz, CDCl<sub>3</sub>)

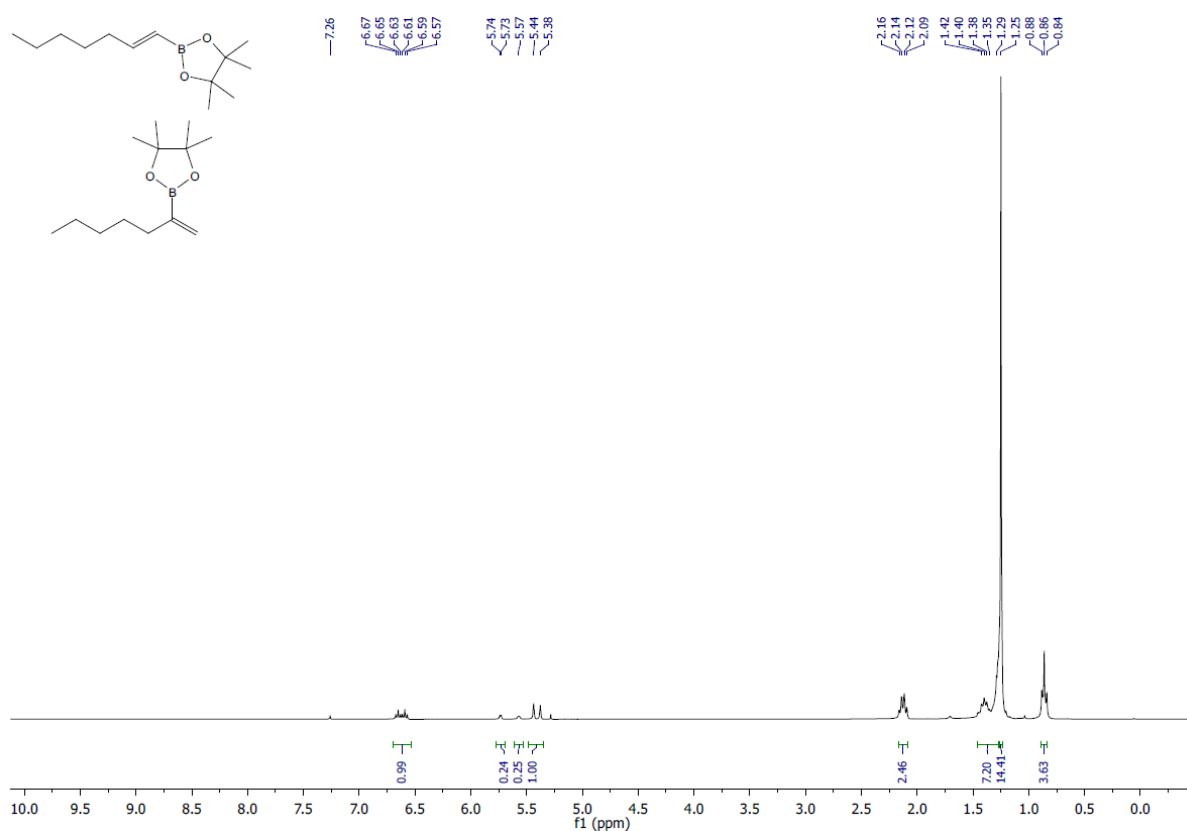

<sup>13</sup>C NMR (75 MHz, CDCl<sub>3</sub>)

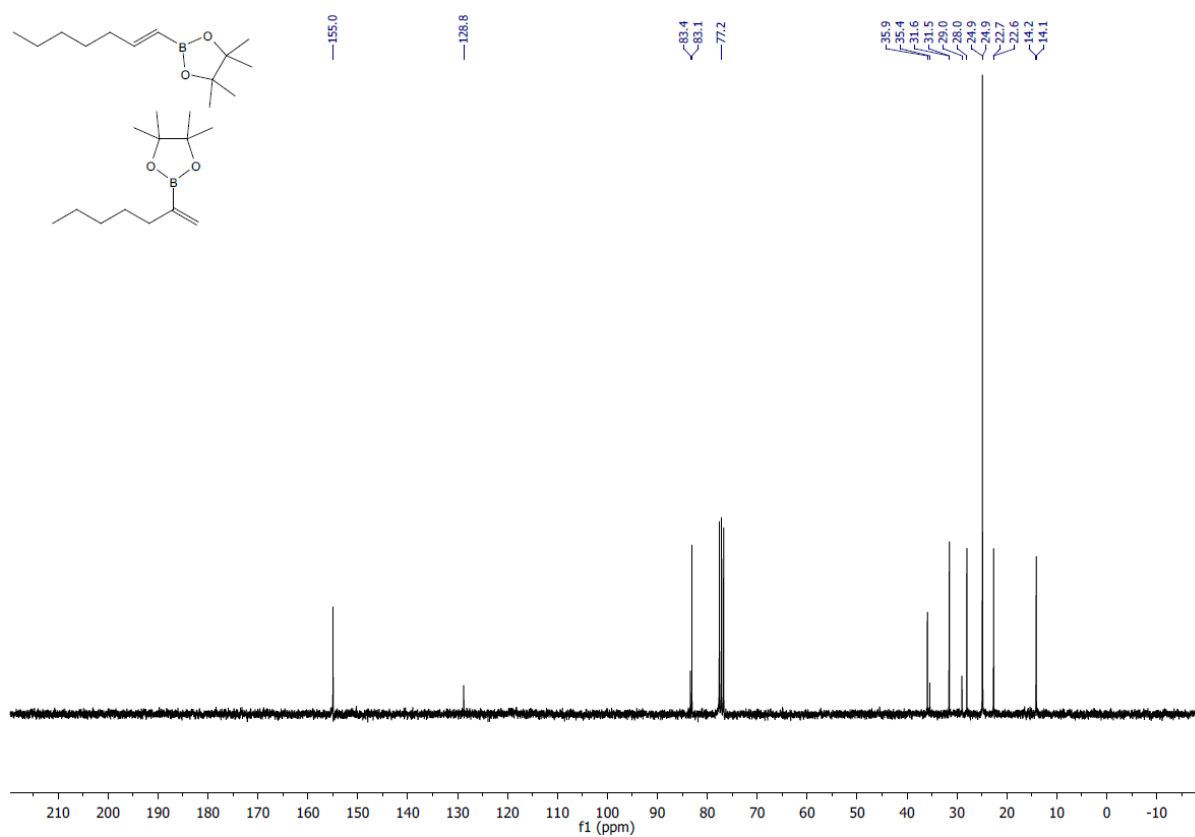

**(E)-2-(4-bromobut-1-en-1-yl)-4,4,5,5-tetramethyl-1,3,2-dioxaborolane (39, Major)**

$^1\text{H NMR}$  (300 MHz,  $\text{CDCl}_3$ )

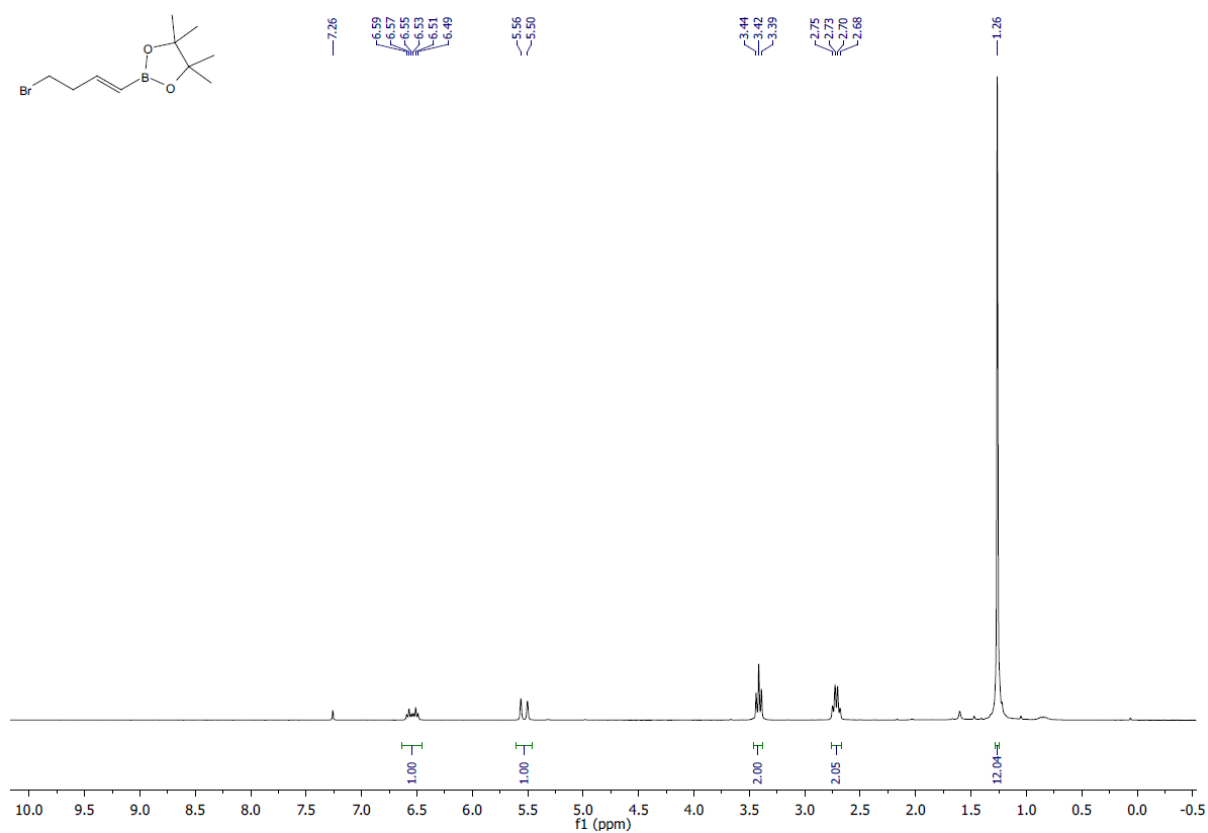

$^{13}\text{C NMR}$  (75 MHz,  $\text{CDCl}_3$ )

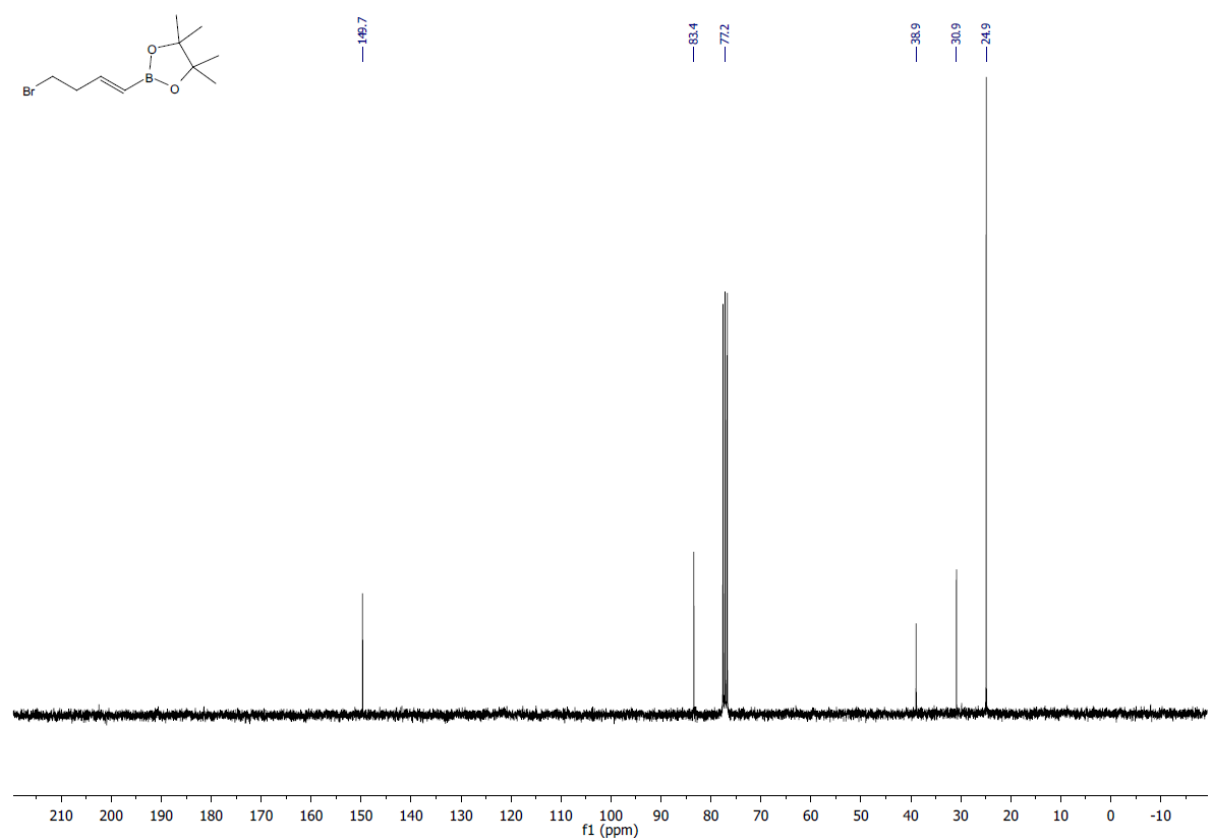

## 2-(4-bromobut-1-en-2-yl)-4,4,5,5-tetramethyl-1,3,2-dioxaborolane (39, Minor)

$^1\text{H}$  NMR (300 MHz,  $\text{CDCl}_3$ )

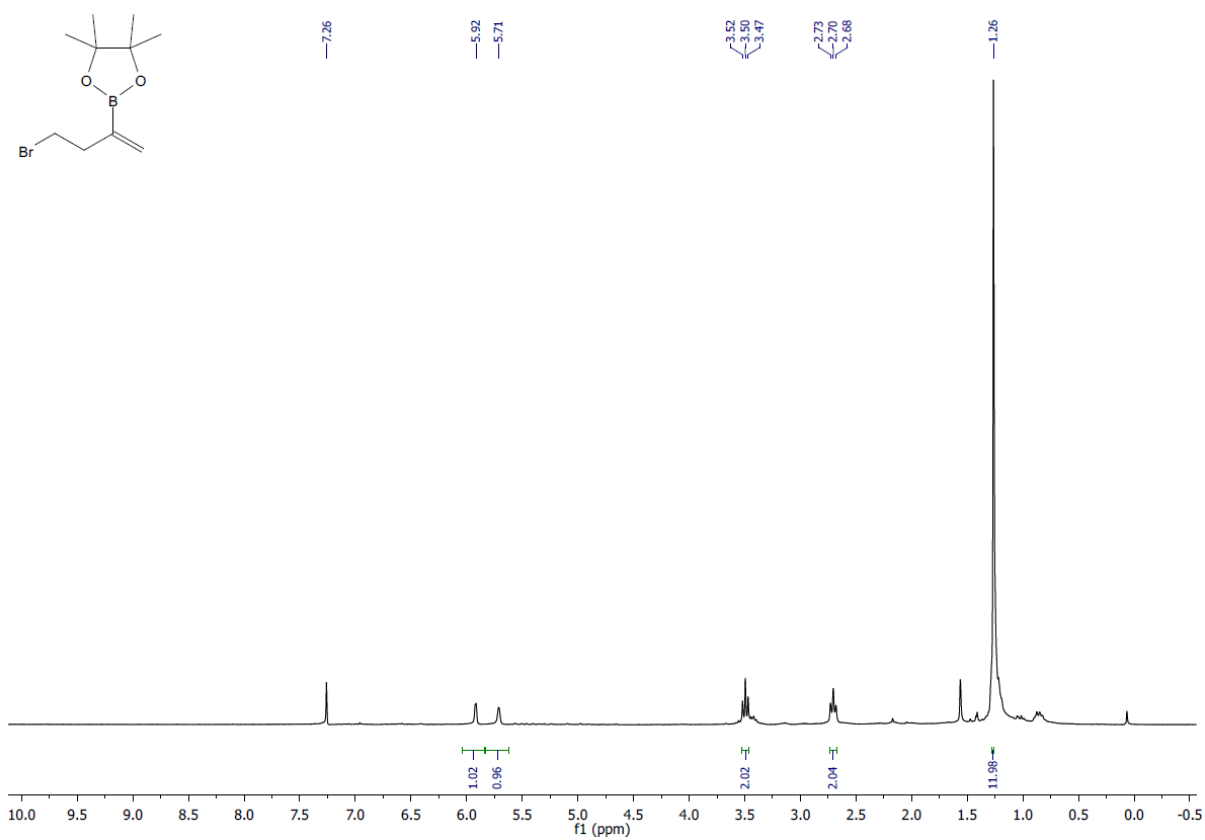

$^{13}\text{C}$  NMR (75 MHz,  $\text{CDCl}_3$ )

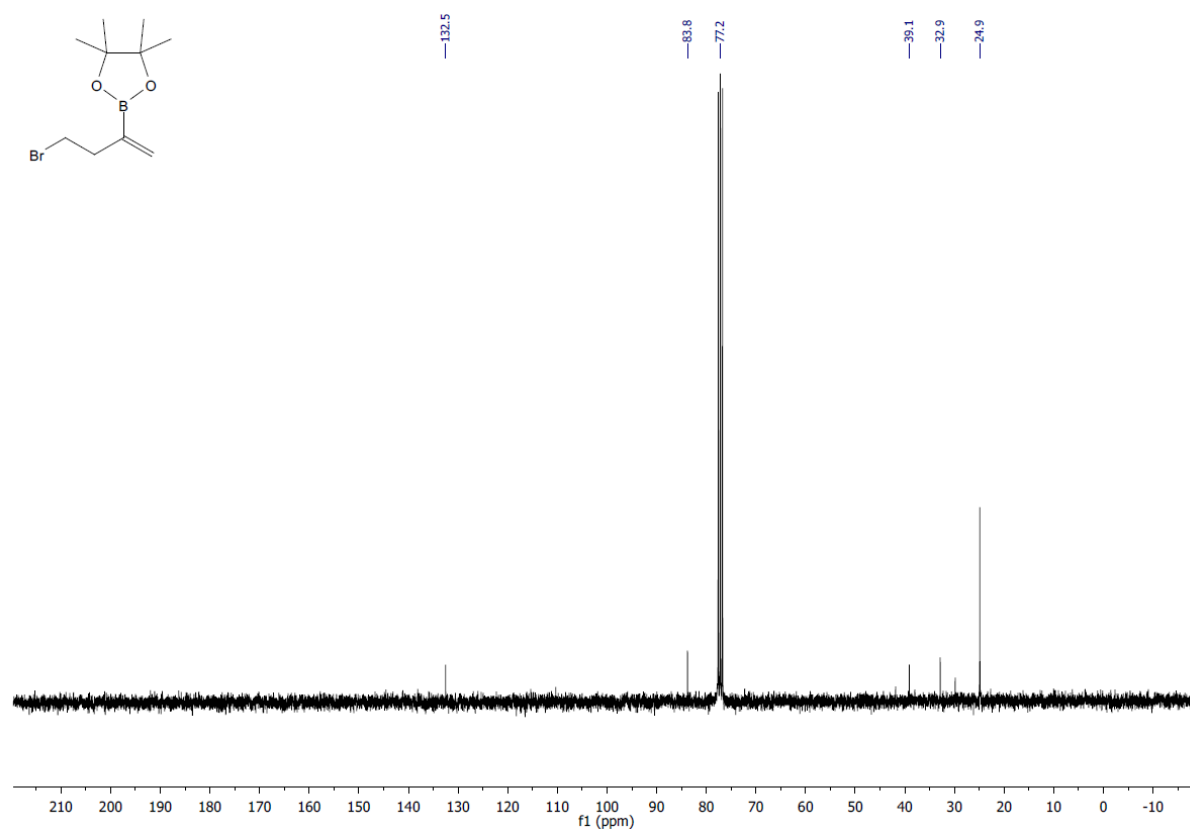

**(Z)-4,4,5,5-tetramethyl-2-(1-phenylprop-1-en-2-yl)-1,3,2-dioxaborolane & (Z)-4,4,5,5-tetramethyl-2-(1-phenylprop-1-en-1-yl)-1,3,2-dioxaborolane (40)**

<sup>1</sup>H NMR (300 MHz, C<sub>6</sub>D<sub>6</sub>)

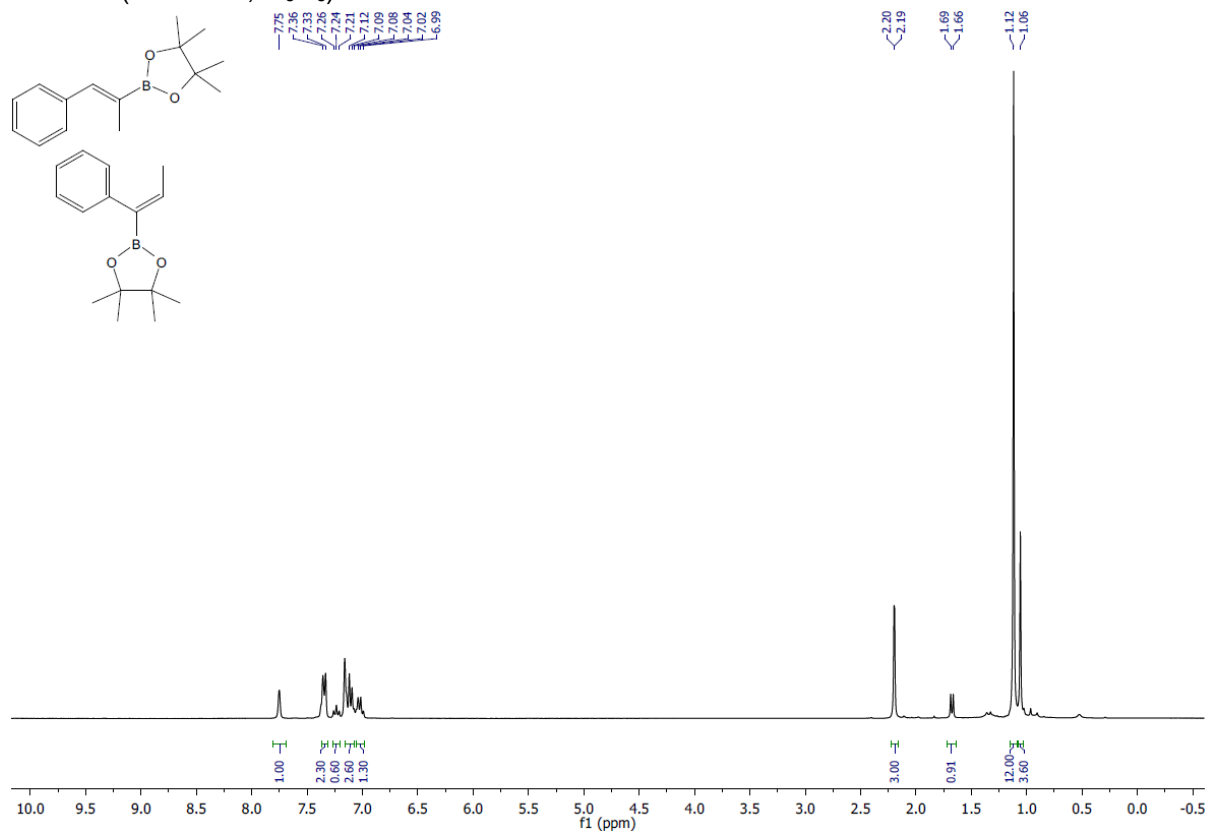

<sup>13</sup>C NMR (75 MHz, CDCl<sub>3</sub>)

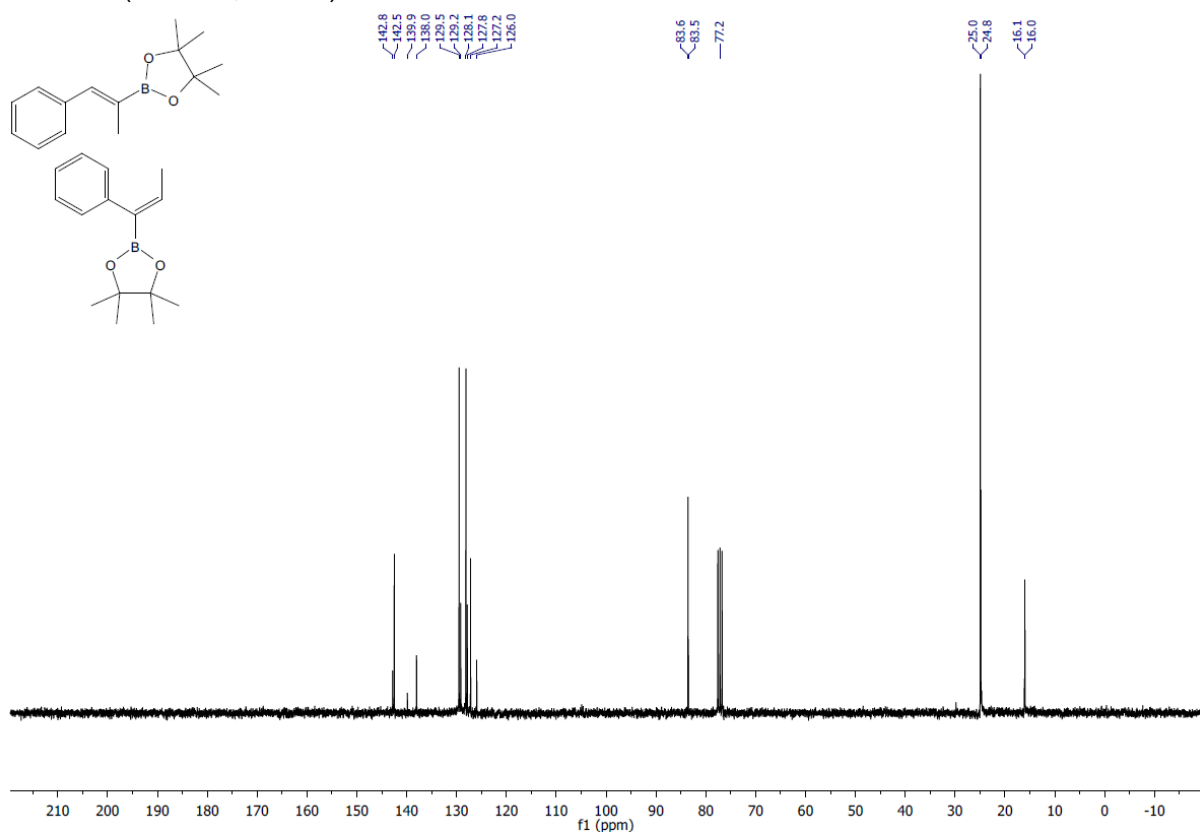

**(Z)-2-(1,2-diphenylvinyl)-4,4,5,5-tetramethyl-1,3,2-dioxaborolane (41)**

$^1\text{H NMR}$  (300 MHz,  $\text{C}_6\text{D}_6$ )

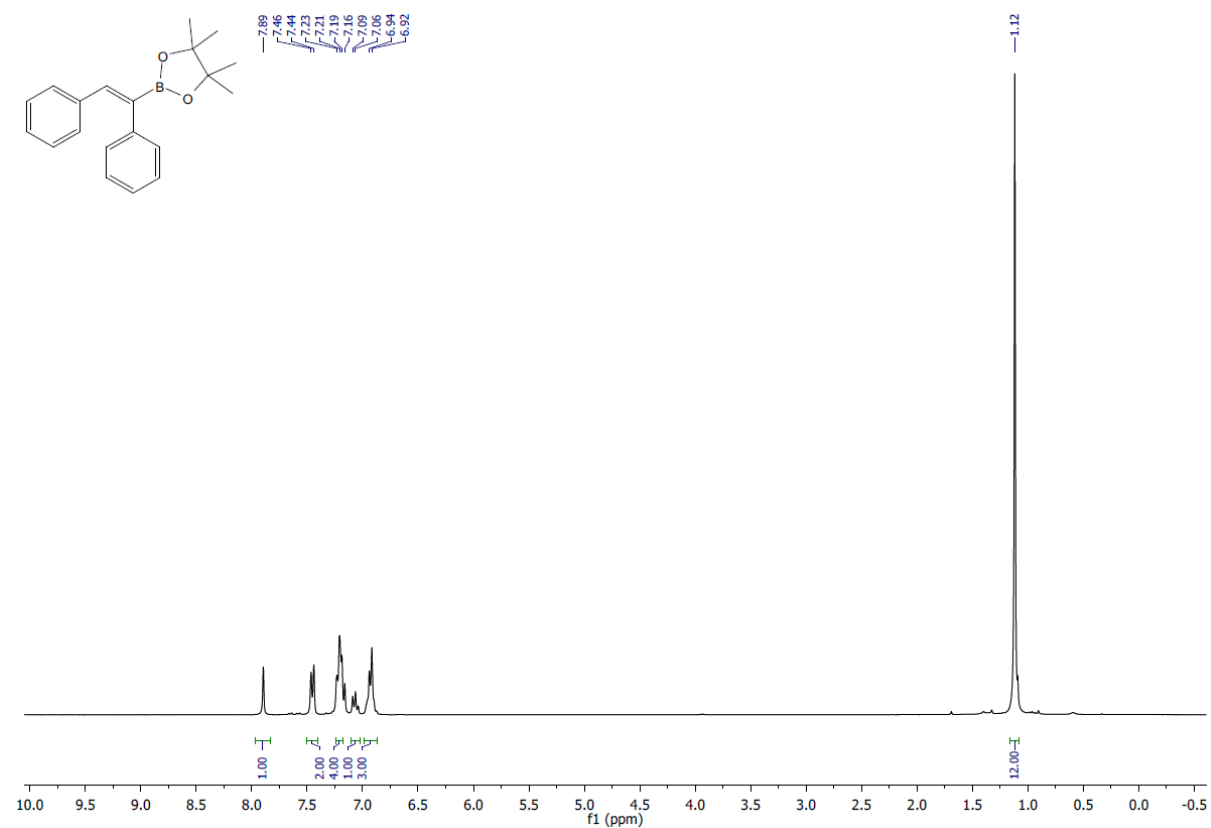

$^{13}\text{C NMR}$  (75 MHz,  $\text{CDCl}_3$ )

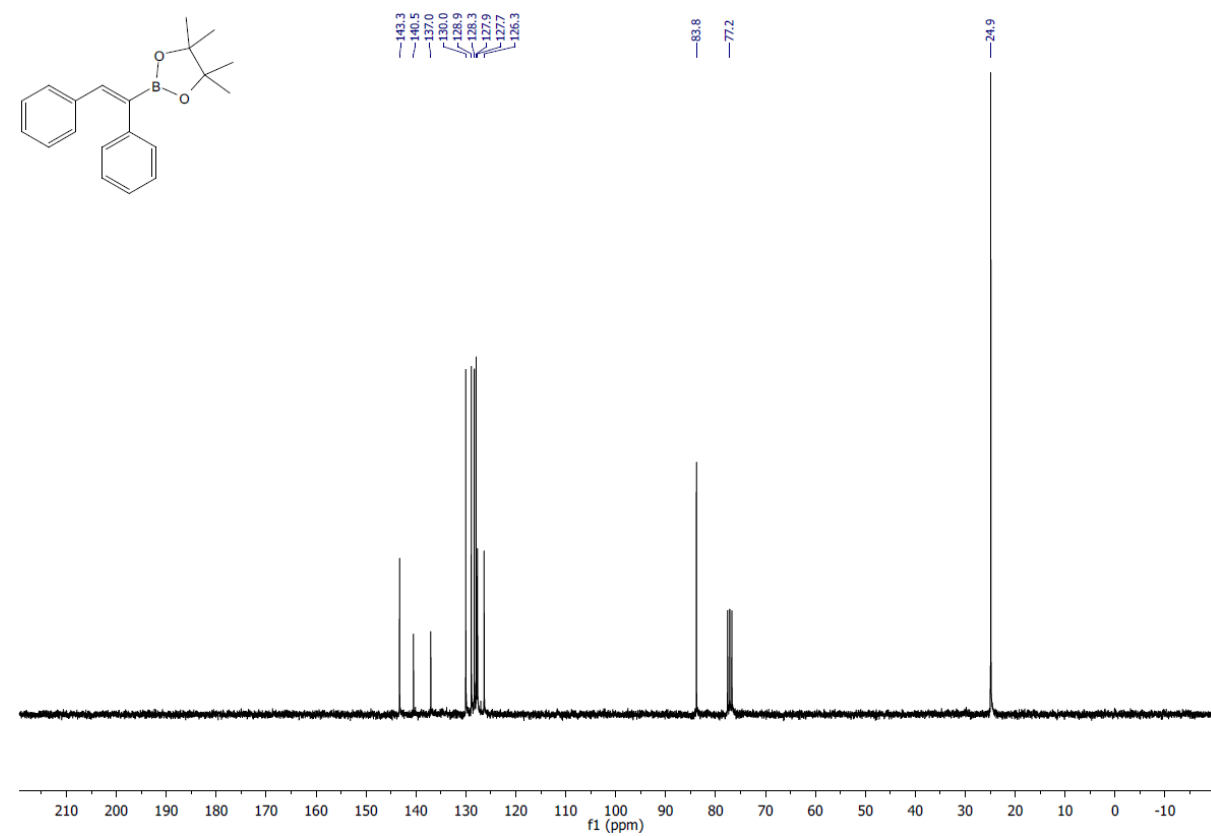

**(8*R*,9*S*,13*S*,14*S*,17*R*)-13-methyl-17-((*E*)-2-(4,4,5,5-tetramethyl-1,3,2-dioxaborolan-2-yl)vinyl)-7,8,9,11,12,13,14,15,16,17-decahydro-6*H*-cyclopenta[*a*]phenanthrene-3,17-diol (42)**

<sup>1</sup>H NMR (300 MHz, CDCl<sub>3</sub>)

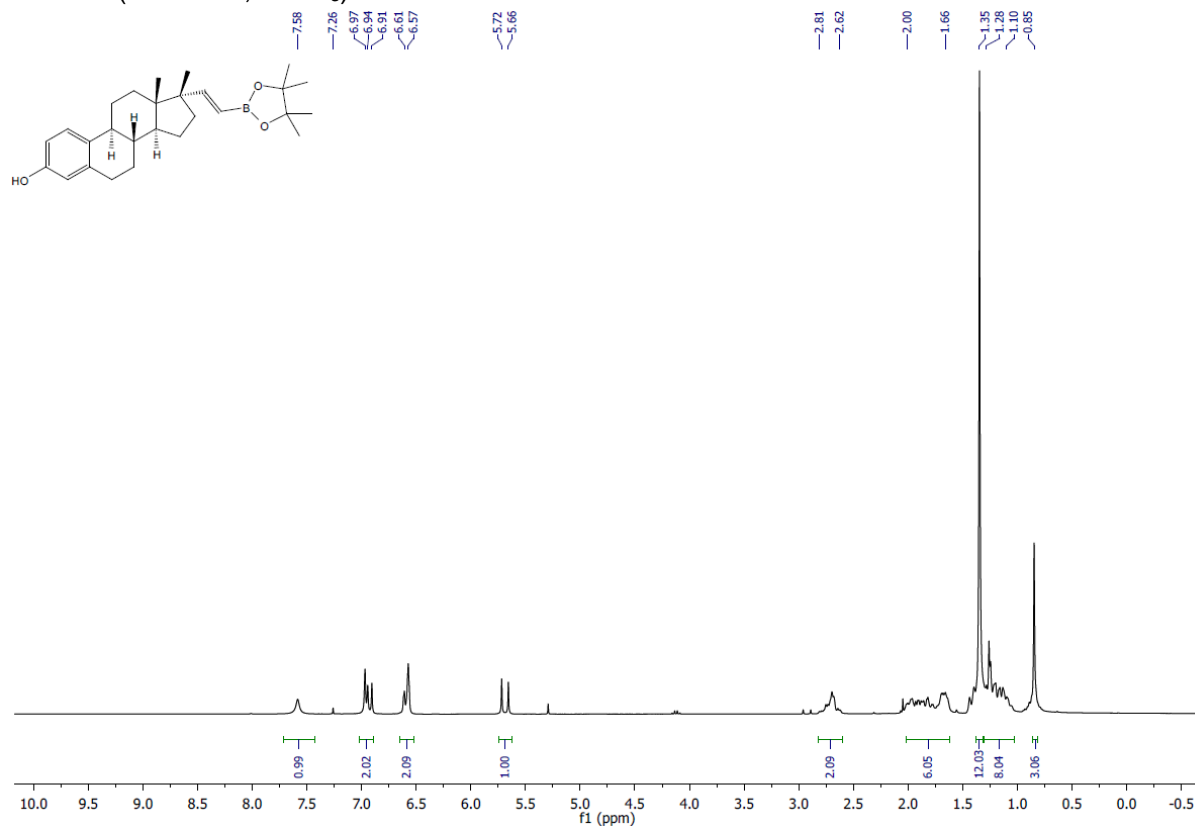

<sup>13</sup>C NMR (75 MHz, CDCl<sub>3</sub>)

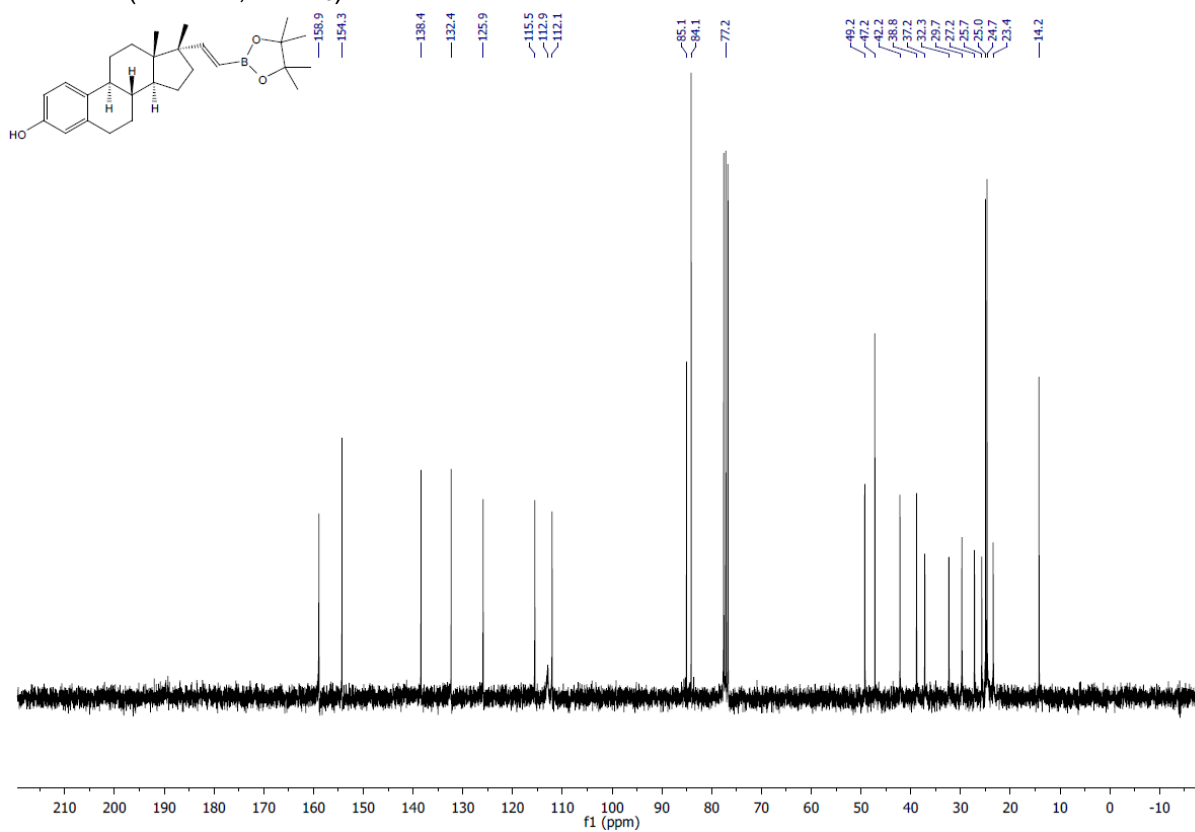

**(8*R*,9*S*,13*S*,14*S*,17*R*)-3-methoxy-13-methyl-17-((*E*)-2-(4,4,5,5-tetramethyl-1,3,2-dioxaborolan-2-yl)vinyl)-7,8,9,11,12,13,14,15,16,17-decahydro-6*H*-cyclopenta[*a*]phenanthren-17-ol (43)**

<sup>1</sup>H NMR (300 MHz, CDCl<sub>3</sub>)

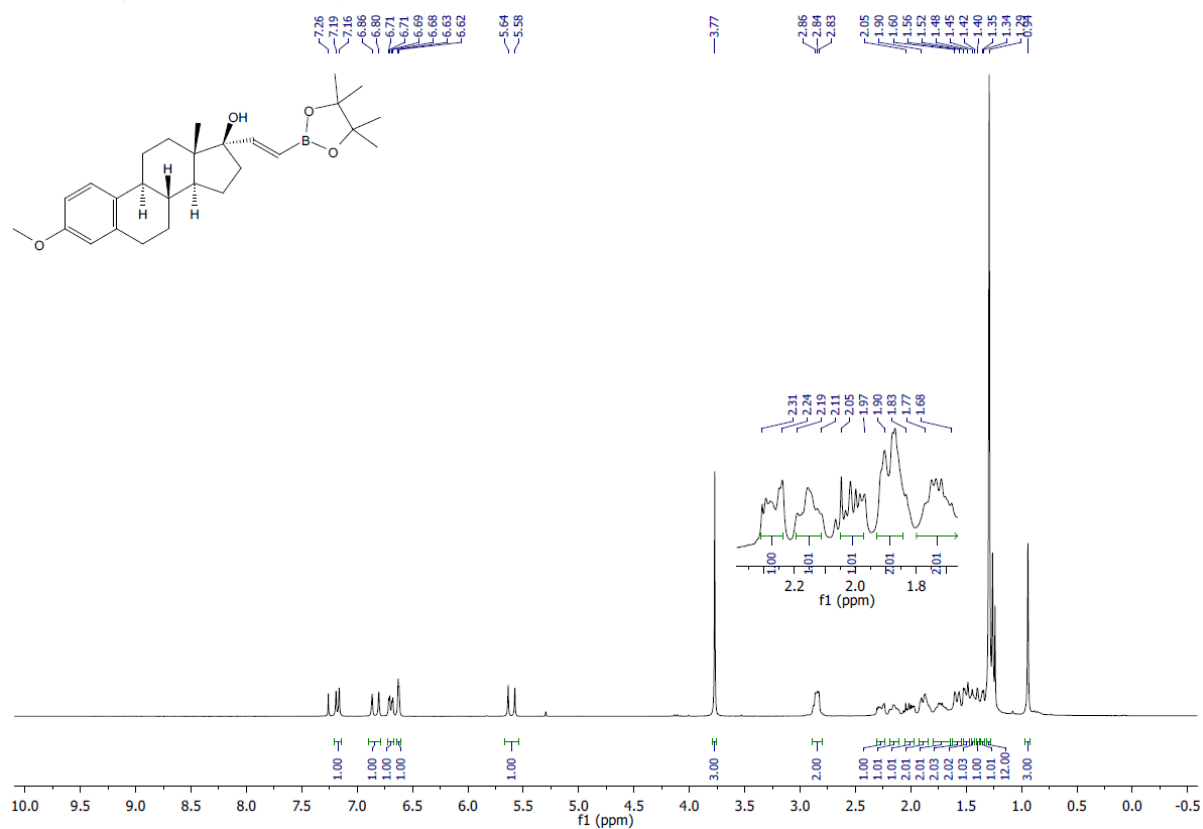

<sup>13</sup>C NMR (75 MHz, CDCl<sub>3</sub>)

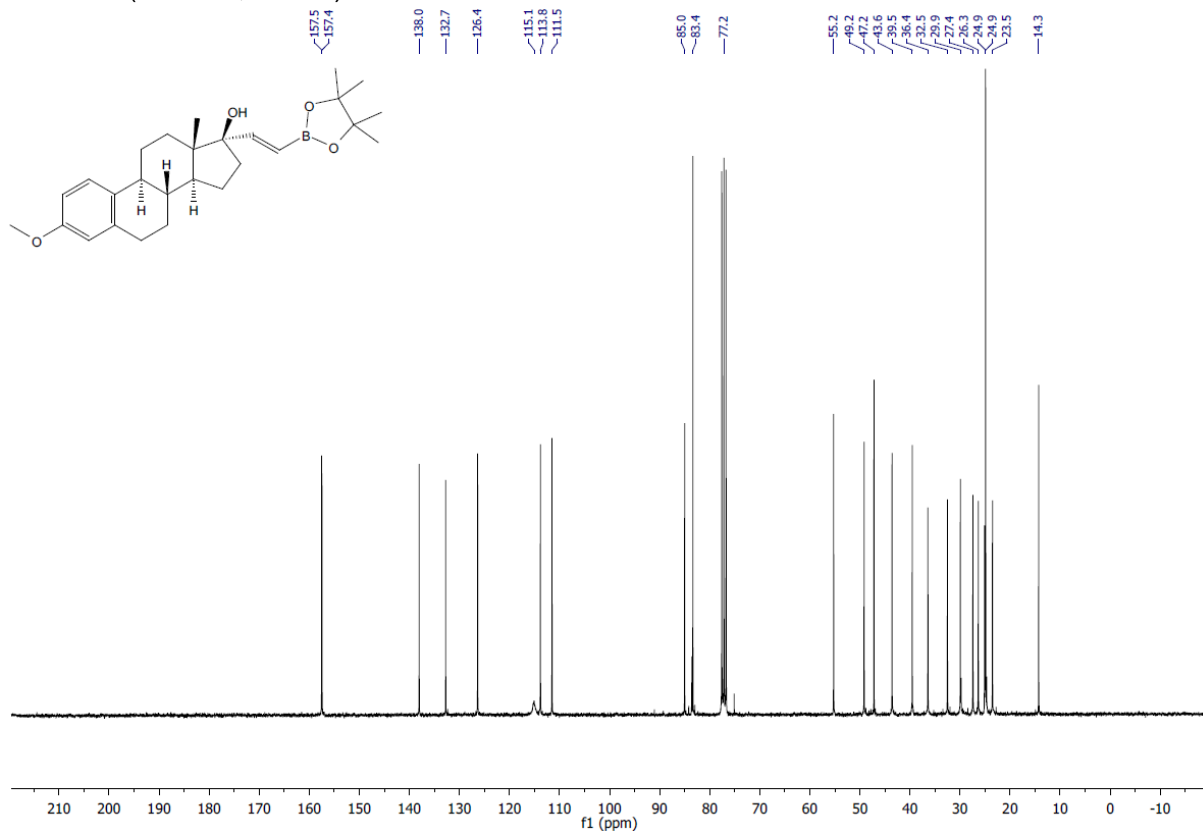

**4,4,5,5-tetramethyl-2-((*E*)-3-(((*R*)-2,5,7,8-tetramethyl-2-((4*R*,8*R*)-4,8,12-trimethyltridecyl)chroman-6-yl)oxy)prop-1-en-1-yl)-1,3,2-dioxaborolane (44)**

<sup>1</sup>H NMR (300 MHz, CDCl<sub>3</sub>)

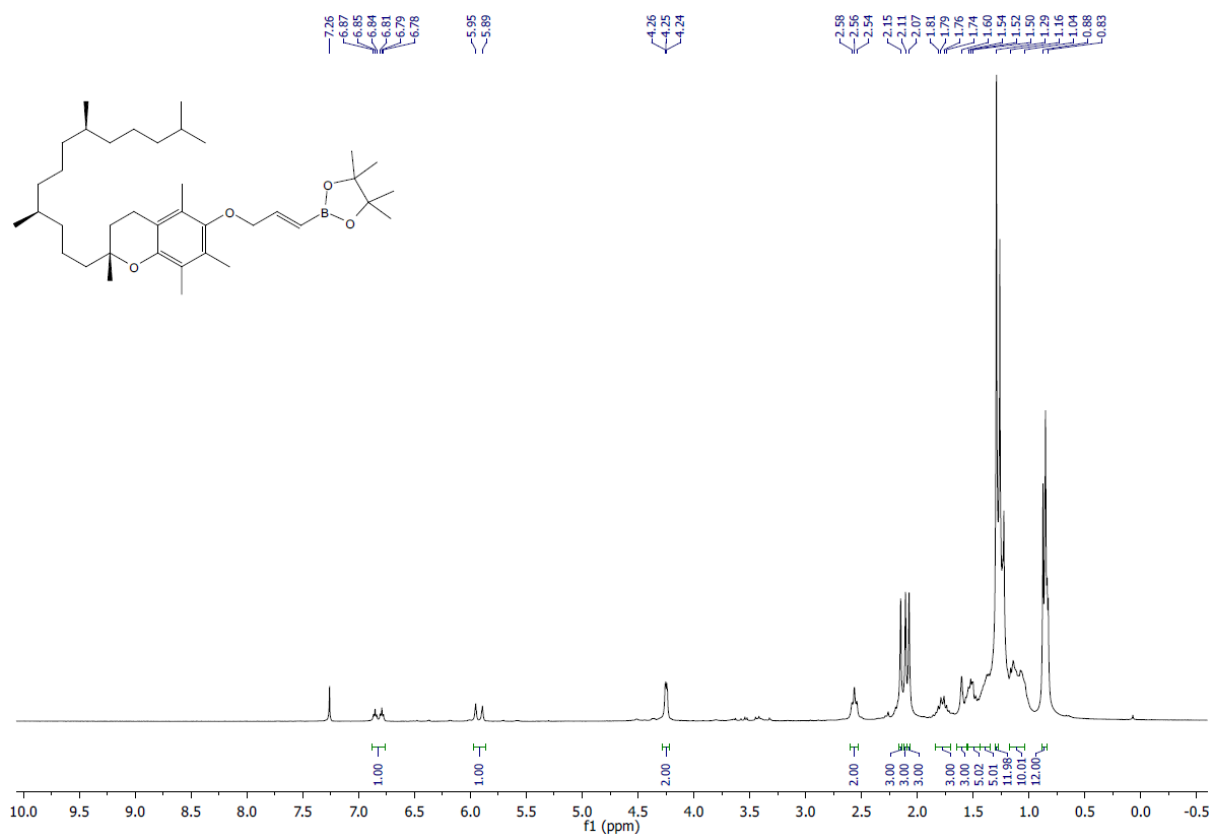

<sup>13</sup>C NMR (75 MHz, CDCl<sub>3</sub>)

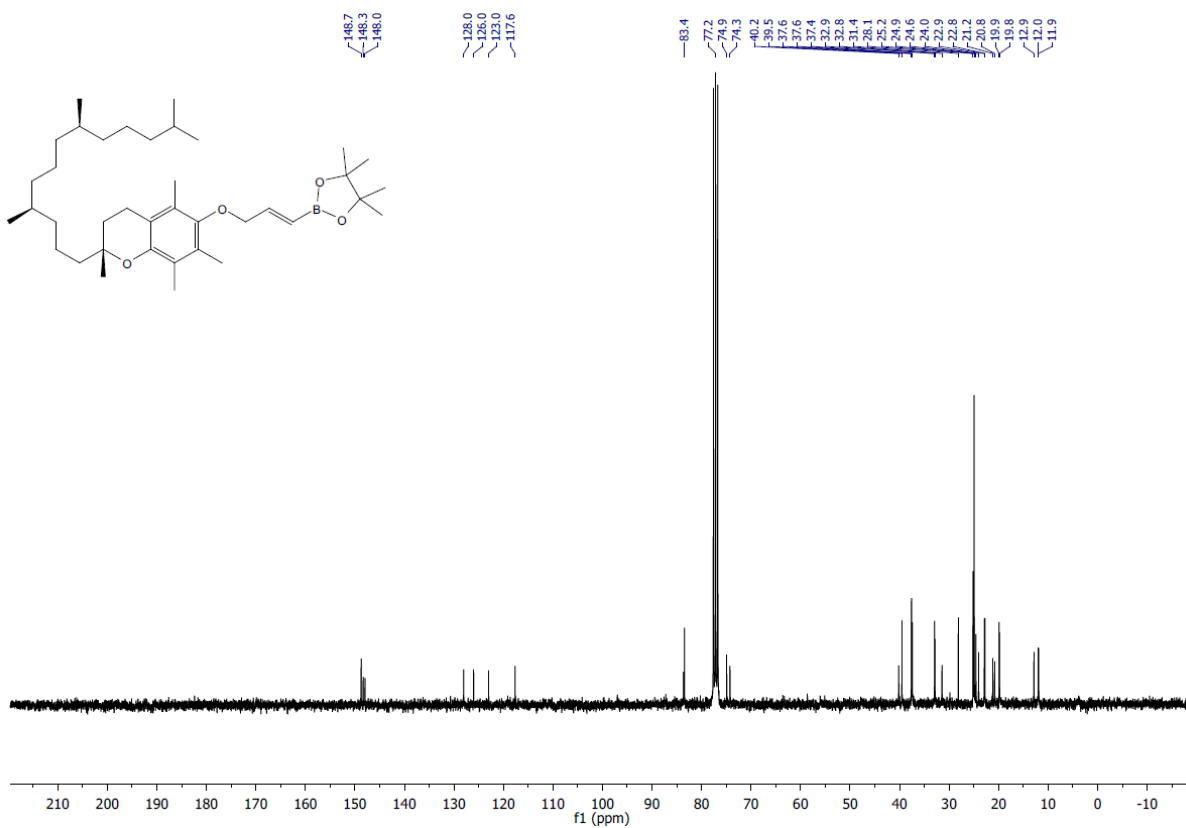



## References

- <sup>1</sup> Zhou, B. W.; Chen, H.; Wang, C. Y. *J. Am. Chem. Soc.* **2013**, *135*, 1264-1267.
- <sup>2</sup> Ferroni, C.; Pepe, A.; Kim, Y. S.; Lee, S.; Guerrini, A.; Parenti, M. D.; Tesei, A.; Zamagni, A.; Cortesi, M.; Zaffaroni, N.; De Cesare, M.; Beretta, G. L.; Trepel, J. B.; Malhotra, S. V.; Varchi, G. *J. Med. Chem.* **2017**, *60*, 3082-3093.
- <sup>3</sup> Lanners, S.; Norouzi-Arasi, H.; Khiri, N.; Hanquet, G. *Eur. J. Org. Chem.* **2007**, *24*, 4065-4075.
- <sup>4</sup> Wang, C.; Wu, C.; Ge, S. *ACS Catal.* **2016**, *6*, 7585-7589.
- <sup>5</sup> Wang, Y.; Guan, R.; Sivaguru, P.; Cong, X.; Bi, X. *Org. Lett.* **2019**, *21*, 4035-4038.
- <sup>6</sup> Niwa, T.; Ochiai, H.; Isoda, M.; Hosoya, T. *Chem. Lett.* **2017**, *46*, 1315-1318.
- <sup>7</sup> Hong, S.; Zhang, W.; Liu, M.; Yao, Z.; Deng, W. *Tetrahedron Lett.* **2016**, *57*, 1-4.
- <sup>8</sup> Zhao, J.; Niu, Z.; Fu, H.; Li, Y. *Chem. Commun.*, **2014**, *50*, 2058-2060.
- <sup>9</sup> Fyfe, J. W. B.; Seath, C. P.; Watson, A. J. B. *Angew. Chem. Int. Ed.* **2014**, *53*, 12077-12080.
- <sup>10</sup> Grirrane, A.; Corma, A.; Garcia, H. *Chem. Eur. J.* **2017**, *17*, 2467-2478.
- <sup>11</sup> Mandal, S.; Kumar, P.; Geetharani, K. *Chem. Commun.* **2018**, *54*, 13690-13693.
- <sup>12</sup> Liu, S.; Zeng, X.; Xu, B. *Tetrahedron Lett.* **2016**, *57*, 3706-3710.
- <sup>13</sup> Yang, Z.; Zhong, M.; Ma, X.; Nijesh, K.; De, S.; Parameswaran, P.; Roesky, H. *J. Am. Chem. Soc.* **2016**, *138*, 2548-2551.
- <sup>14</sup> Coombs, J. R.; Zhang, L.; Morken, J. P. *Org. Lett.* **2015**, *17*, 1708-1711.
- <sup>15</sup> Yoshida, H.; Kageyuki, I.; Takaki, K. *Org. Lett.* **2014**, *16*, 3512-3215.
- <sup>16</sup> Pitzer, L.; Schäfers, F.; Glorius, F. *Angew. Chem. Int. Ed.* **2019**, *58*, 8572-8576.
